# Supplementary material for: Environmental DNA at the population level: advancing conservation through non-invasive genetic and genomic approaches
Source: Research Square preprint supplement (doi:10.21203/rs.3.rs-8659594/v1), 2026-02-02
Supplement: Supplementary file 1 [file 6fda42c9ad5b4e9f9e6f3517.xlsx]

## Sheet: A. List of articles retrieved
Supplementary Table 1: Detailed overview of the study selection process for PRISMA systematic review. This table summarizes all steps from the initial literature search to the final set of included articles. A) List of articles retrieved. A total of the 1072 records were identified through searches in Scopus, Web of Science, and PubMed using terms related to eDNA and population genetics. Informat…
Title	Year	DOI	Abstract	Author Keywords	Index Keywords	Language of Original Document	Document Type	Source
A combined paleolimnological/genetic analysis of diatoms reveals divergent evolutionary lineages of Staurosira and Staurosirella (Bacillariophyta) in Siberian lake sediments along a latitudinal transect	2014	10.1007/s10933-014-9779-1	Diatom diversity in lakes of northwest Yakutia (Siberia) was investigated by microscopic and genetic analysis of surface and cored lake sediments, to evaluate the use of sedimentary DNA for paleolimnological diatom studies and to identify obscure genetic diversity that cannot be detected by microscopic methods. Two short (76 and 73 bp) and one longer (577 bp) fragments of the ribulose 1,5-bisphos…	Arctic Lake Sediments; Diatoms; Environmental Dna; Intraspecific Variation; Rbcl; Diatom; Dominance; Genetic Analysis; Intraspecific Variation; Lacustrine Deposit; Scanning Electron Microscopy; Spatial Distribution; Species Complex; Transect; Russian Federation; Sakha; Siberia; Bacillariophyta; Staurosira; Staurosirella	diatom; dominance; genetic analysis; intraspecific variation; lacustrine deposit; scanning electron microscopy; spatial distribution; species complex; transect; Russian Federation; Sakha; Siberia; Bacillariophyta; Staurosira; Staurosirella	English	Article	Scopus
A combined paleolimnological/genetic analysis of diatoms reveals divergent evolutionary lineages of Staurosira and Staurosirella (Bacillariophyta) in Siberian lake sediments along a latitudinal transect	2014	10.1007/s10933-014-9779-1	Diatom diversity in lakes of northwest Yakutia (Siberia) was investigated by microscopic and genetic analysis of surface and cored lake sediments, to evaluate the use of sedimentary DNA for paleolimnological diatom studies and to identify obscure genetic diversity that cannot be detected by microscopic methods. Two short (76 and 73 bp) and one longer (577 bp) fragments of the ribulose 1,5-bisphos…	Arctic lake sediments; Diatoms; Environmental DNA; Intraspecific variation; RbcL	ANCIENT DNA; DIVERSITY; PHYLOGENY; GENETICS; COMPATIBILITY; PRESERVATION; COMMUNITIES; VARIABILITY; VEGETATION; SEQUENCES	English	Article	Web of Science
A comparative phylogeographic approach to facilitate recovery of an imperiled freshwater mussel (Bivalvia: Unionida: Potamilus inflatus)	2020	10.3390/d12070281	North American freshwaters are among the world's most threatened ecosystems, and freshwater mussels are among the most imperiled inhabiting these systems. A critical aspect of conservation biology is delineating patterns of genetic diversity, which can be difficult when a taxon has been extirpated from a significant portion of its historical range. In such cases, evaluating conservation and recov…	Conservation; Endangered Species; Genetic Management; Phylogenetics; Surrogate Species; Synchronous Diversification; Bivalve; Comparative Study; Dispersal; Divergence; Genetic Structure; Genetic Variation; Life History; Mitochondrion; Phylogeography; Amite River; Louisiana; United States; Bivalvia; Potamilus; Potamilus Inflatus	bivalve; comparative study; dispersal; divergence; genetic structure; genetic variation; life history; mitochondrion; phylogeography; Amite River; Louisiana; United States; Bivalvia; Potamilus; Potamilus inflatus	English	Article	Scopus
A Comparative Phylogeographic Approach to Facilitate Recovery of an Imperiled Freshwater Mussel (Bivalvia: Unionida:Potamilus inflatus)	2020	10.3390/d12070281	North American freshwaters are among the world's most threatened ecosystems, and freshwater mussels are among the most imperiled inhabiting these systems. A critical aspect of conservation biology is delineating patterns of genetic diversity, which can be difficult when a taxon has been extirpated from a significant portion of its historical range. In such cases, evaluating conservation and recov…	surrogate species; phylogenetics; synchronous diversification; endangered species; genetic management; conservation	EFFECTIVE POPULATION-SIZE; GENETIC DIVERSITY; PEARL RIVER; MOLECULAR SYSTEMATICS; CONSERVATION STATUS; POTAMILUS INFLATUS; CHRONIC TOXICITY; MODEL SELECTION; NORTH-AMERICA; UNIONIDAE	English	Article	Web of Science
A field ornithologist's guide to genomics: Practical considerations for ecology and conservation	2016	10.1642/AUK-16-49.1	Vast improvements in sequencing technology have made it practical to simultaneously sequence millions of nucleotides distributed across the genome, opening the door for genomic studies in virtually any species. Ornithological research stands to benefit in three substantial ways. First, genomic methods enhance our ability to parse and simultaneously analyze both neutral and non-neutral genomic reg…	adaptation; birds; conservation units; eDNA; landscape genomics; next-generation sequencing; population history; single-nucleotide polymorphisms	GREATER SAGE-GROUSE; EFFECTIVE POPULATION-SIZE; WHOLE-GENOME; GENETIC-VARIATION; WIDE ASSOCIATION; RNA-SEQ; SPECIES CONSERVATION; LANDSCAPE GENOMICS; ATLANTIC COD; TRANSCRIPTOME RESPONSE	English	Review	Web of Science
A Framework to Unify the Relationship Between Numerical Abundance, Biomass, and Environmental DNA	2025	10.1002/edn3.70073	Does environmental DNA (eDNA) concentration correlate with numerical abundance (N) or biomass in aquatic organisms? We hypothesize that eDNA can be adjusted to simultaneously reflect both. Building on frameworks developed from the Metabolic Theory of Ecology, we derive two equations to adjust eDNA data to simultaneously reflect both N and biomass using population size structure data and allometri…	Abundance; Allometric Scaling; Allometry; Biomass; Edna; Fishes; Metabolic Theory; N; Population Size		English	Article	Scopus
A Framework to Unify the Relationship Between Numerical Abundance, Biomass, and Environmental DNA	2025	10.1002/edn3.70073	Does environmental DNA (eDNA) concentration correlate with numerical abundance (N) or biomass in aquatic organisms? We hypothesize that eDNA can be adjusted to simultaneously reflect both. Building on frameworks developed from the Metabolic Theory of Ecology, we derive two equations to adjust eDNA data to simultaneously reflect both N and biomass using population size structure data and allometri…	abundance; allometric scaling; allometry; biomass; eDNA; fishes; metabolic theory; N; population size	METABOLIC THEORY; FISH; QUANTIFICATION; DEGRADATION; TEMPERATURE; ANIMALS; ECOLOGY; RATES	English	Article	Web of Science
A genotyping by sequencing approach can disclose Apis mellifera population genomic information contained in honey environmental DNA	2022	10.1038/s41598-022-24101-z	Awareness has been raised over the last years on the genetic integrity of autochthonous honey bee subspecies. Genomic tools available in Apis mellifera can make it possible to measure this information by targeting individual honey bee DNA. Honey contains DNA traces from all organisms that contributed or were involved in its production steps, including the honey bees of the colony. In this study, …	Dna; Dna; Dna, Environmental; Dna; Animal; Bee; Genetics; Genotype; Honey; Metagenomics; Animals; Bees; Dna, Environmental; Genotype; Honey; Metagenomics	DNA; animal; bee; genetics; genotype; honey; metagenomics; Animals; Bees; DNA, Environmental; Genotype; Honey; Metagenomics	English	Article	Scopus
A genotyping by sequencing approach can disclose Apis mellifera population genomic information contained in honey environmental DNA	2022	10.1038/s41598-022-24101-z	Awareness has been raised over the last years on the genetic integrity of autochthonous honey bee subspecies. Genomic tools available in Apis mellifera can make it possible to measure this information by targeting individual honey bee DNA. Honey contains DNA traces from all organisms that contributed or were involved in its production steps, including the honey bees of the colony. In this study, …		PROTECTED POPULATIONS; DEFENSE BEHAVIOR; BEE POPULATIONS; CLIMATE-CHANGE; INTROGRESSION; CONSERVATION; BIODIVERSITY; LIGUSTICA; SICILIANA; PATTERNS	English	Article	Web of Science
A genotyping by sequencing approach can disclose Apis mellifera population genomic information contained in honey environmental DNA	2022	10.1038/s41598-022-24101-z		Dna Damage Rate; Dnase; Environmental Dna (edna); Intra-cellular Dna; Statistical Modeling		English	Article	PubMed
A higher DNA damage rate in aqueous eDNA particles suggests intra-cellular eDNA degradation in cellular environments	2023	10.1002/edn3.383	A higher DNA quality in an environmental DNA (eDNA) sample is crucial for the improved and precise assessment of biodiversity via eDNA analysis. However, the frequency of damage of DNA molecules released from macro-organisms in aquatic environments remains unclear. As a proof of concept, the rate of DNA damage (λ; per base pair) in an eDNA sample was estimated by measuring the quantity of target …	Dna Damage Rate; Dnase; Environmental Dna (edna); Intra-cellular Dna; Statistical Modeling		English	Article	Scopus
A higher DNA damage rate in aqueous eDNA particles suggests intra-cellular eDNA degradation in cellular environments	2023	10.1002/edn3.383	A higher DNA quality in an environmental DNA (eDNA) sample is crucial for the improved and precise assessment of biodiversity via eDNA analysis. However, the frequency of damage of DNA molecules released from macro-organisms in aquatic environments remains unclear. As a proof of concept, the rate of DNA damage (lambda; per base pair) in an eDNA sample was estimated by measuring the quantity of ta…	DNA damage rate; DNase; environmental DNA (eDNA); intra-cellular DNA; statistical modeling	EXTRACELLULAR DNA; MITOCHONDRIAL; TEMPERATURE; PERSISTENCE; NUCLEAR	English	Article	Web of Science
A Method for the Separation of Phytophthora Oosporesfrom Soil for DNA-Based Detection	2025	10.1007/978-1-0716-4330-3_10	Here, we present a protocol for the isolation and detection of Phytophthora oospores directly from soil samples. Our method incorporates a novel technique for isolating Phytophthora oospores using filter pouches and an improved DNA extraction procedure specifically designed for oospores. While we have primarily developed this protocol for detecting P. agathidicida oospores using end-point PCR, we…	Detection; Dna; Filtration; Oospores; Pcr; Phytophthora Agathidicida; Soil; Dna; Dna; Environmental Dna; Allele Specific Polymerase Chain Reaction; Commercial Phenomena; Controlled Study; Dna Extraction; Filtration; Microorganism Detection; Nonhuman; Oospore; Phytophthora; Phytophthora Oosporesfrom; Polymerase Chain Reaction; Protocol; Separation Technique; Soil; Genetics; Isolation And Purificat…	DNA; environmental DNA; allele specific polymerase chain reaction; commercial phenomena; controlled study; DNA extraction; filtration; microorganism detection; nonhuman; oospore; Phytophthora; phytophthora oosporesfrom; polymerase chain reaction; protocol; separation technique; soil; genetics; isolation and purification; microbiology; procedures; Polymerase Chain Reaction; Soil Microbiology	English	Book chapter	Scopus
A Model and Simulation of the Influence of Temperature and Amplicon Length on Environmental DNA Degradation Rates: A Meta-Analysis Approach	2021	10.3389/fevo.2021.623831	Environmental DNA (eDNA) analysis can detect aquatic organisms, including rare and endangered species, in a variety of habitats. Degradation can influence eDNA persistence, impacting eDNA-based species distribution and occurrence results. Previous studies have investigated degradation rates and associated contributing factors. It is important to integrate data from across these studies to better …	Degradation Rate; Environmental Dna; Meta-analysis; Polymerase Chain Reaction; Quantile Model		English	Article	Scopus
A Model and Simulation of the Influence of Temperature and Amplicon Length on Environmental DNA Degradation Rates: A Meta-Analysis Approach	2021	10.3389/fevo.2021.623831	Environmental DNA (eDNA) analysis can detect aquatic organisms, including rare and endangered species, in a variety of habitats. Degradation can influence eDNA persistence, impacting eDNA-based species distribution and occurrence results. Previous studies have investigated degradation rates and associated contributing factors. It is important to integrate data from across these studies to better …	environmental DNA; polymerase chain reaction; degradation rate; quantile model; meta-analysis	DECAY-RATES; EDNA	English	Article	Web of Science
A New Dawn for Protist Biogeography	2024	10.1111/geb.13925	AimBiogeographers have believed for a long time that the geographical distributions of protists are only determined by environmental conditions, because dispersal is not limited. During the past two decades, the field has come a long way to show that historical and spatial factors also significantly contribute to shaping protist distributions, calling for a reappraisal of our understanding of pro…	biodiversity; biogeographical patterns; diversification; eDNA; endemism; environmental and historical factors; genomics; microeukaryotes; protists; speciation	POPULATION GENETIC-STRUCTURE; FRESH-WATER DIATOMS; MORPHOLOGICAL EVOLUTION; MOLECULAR CHARACTERIZATION; CRYPTIC DIVERSIFICATION; COMPLEX BACILLARIOPHYTA; REPRODUCTIVE ISOLATION; GLOBAL DISTRIBUTION; SPATIAL-PATTERNS; RECENT RADIATION	English	Review	Web of Science
A new non-invasive in situ underwater DNA sampling method for estimating genetic diversity	2020	10.1007/s10682-020-10053-1	DNA-based methods form the cornerstone of contemporary evolutionary biology and they are highly valued tools in conservation biology. The development of non-invasive sampling methods can be crucial for both gathering sample sizes needed for robust ecological inference and to avoid a negative impact on small and/or endangered populations. Such sampling is particularly challenging in working with a…	Amphibian; Cave; Conservation genetics; Genetic variation; Population genetics; Swabbing	PROTEUS-ANGUINUS; ENVIRONMENTAL DNA; POPULATIONS; FRAGMENT	English	Article	Web of Science
A non-invasive, DNA-based method for beaver species identification in Finland	2021	10.2981/wlb.00808	For the ability to control an invasive species and to protect an ecologically similar native species it is essential to map the exact distributions of both species. This is difficult if the species are so morphologically similar that their identification in the field is almost impossible. In Finland, the invasive North American beaver Castor canadensis is spreading towards the range of the native…	Edna; Eurasian Beaver; Mtdna; Non-invasive; North American Beaver; Species Identification		English	Article	Scopus
A non-invasive, DNA-based method for beaver species identification in Finland	2021	10.2981/wlb.00808	For the ability to control an invasive species and to protect an ecologically similar native species it is essential to map the exact distributions of both species. This is difficult if the species are so morphologically similar that their identification in the field is almost impossible. In Finland, the invasive North American beaver Castor canadensis is spreading towards the range of the native…	eDNA; Eurasian beaver; mtDNA; non-invasive; North American beaver; species identification	ENVIRONMENTAL DNA	English	Article	Web of Science
A novel eDNA approach for rare species monitoring: Application of long-read shotgun sequencing to Lynx rufus soil pawprints	2023	10.1016/j.biocon.2023.110315	Environmental DNA (eDNA) sampling is a relatively new technique that has been employed in biodiversity surveys around the world. Environmental DNA can be an effective, non-invasive method of identifying the presence of target host species. Furthermore, advances in DNA deep sequencing technologies are enabling in-depth information to be recovered from eDNA. Here we report the development of a bobc…	Bobcat; Edna; Environmental Dna; Florida; Lynx Rufus; Shotgun Nanopore Sequencing; Wildlife Conservation; Biodiversity; Dna; Endangered Species; Nature Conservation; Population Genetics; Species Conservation; Florida [united States]; Jacksonville; United States	biodiversity; DNA; endangered species; nature conservation; population genetics; species conservation; Florida [United States]; Jacksonville; United States	English	Article	Scopus
A novel eDNA approach for rare species monitoring: Application of long-read shotgun sequencing to Lynx rufus soil pawprints	2023	10.1016/j.biocon.2023.110315	Environmental DNA (eDNA) sampling is a relatively new technique that has been employed in biodiversity surveys around the world. Environmental DNA can be an effective, non-invasive method of identifying the presence of target host species. Furthermore, advances in DNA deep sequencing technologies are enabling in-depth information to be recovered from eDNA. Here we report the development of a bobc…	Environmental DNA; eDNA; Lynx rufus; Bobcat; Wildlife conservation; Florida; Shotgun nanopore sequencing	ENVIRONMENTAL DNA; GLOBAL BIODIVERSITY; CONSERVATION; LANDSCAPE; NORTHERN	English	Article	Web of Science
A novel environmental DNA approach to quantify the cryptic invasion of non-native genotypes	2016	10.1111/1755-0998.12460	The invasion of non-native species that are closely related to native species can lead to competitive elimination of the native species and/or genomic extinction through hybridization. Such invasions often become serious before they are detected, posing unprecedented threats to biodiversity. A Japanese native strain of common carp (Cyprinus carpio) has become endangered owing to the invasion of n…	Common Carp; Cryptic Invasion; Cycling Probe Technology; Environmental Dna; Invasive Species; Snp; Dna; Water; Dna; Water; Dna; Water; Biota; Chemistry; Dna Sequence; Genetics; Genotype; Human; Introduced Species; Isolation And Purification; Japan; Metagenomics; Procedures; Real Time Polymerase Chain Reaction; Single Nucleotide Polymorphism; Biota; Genotype; Humans; Introduced Species; Metagenomi…	DNA; water; biota; chemistry; DNA sequence; genetics; genotype; human; introduced species; isolation and purification; Japan; metagenomics; procedures; real time polymerase chain reaction; single nucleotide polymorphism; Biota; Genotype; Humans; Introduced Species; Metagenomics; Polymorphism, Single Nucleotide; Real-Time Polymerase Chain Reaction; Sequence Analysis, DNA; Water	English	Article	Scopus
A novel environmental DNA approach to quantify the cryptic invasion of non-native genotypes	2016	10.1111/1755-0998.12460	The invasion of non-native species that are closely related to native species can lead to competitive elimination of the native species and/or genomic extinction through hybridization. Such invasions often become serious before they are detected, posing unprecedented threats to biodiversity. A Japanese native strain of common carp (Cyprinus carpio) has become endangered owing to the invasion of n…	common carp; cryptic invasion; cycling probe technology; environmental DNA; invasive species; SNP	ANCIENT LINEAGE; CYPRINUS-CARPIO; COMMON CARP; LAKE BIWA; INTROGRESSION	English	Article	Web of Science
A novel environmental DNA approach to quantify the cryptic invasion of non-native genotypes	2016	10.1111/1755-0998.12460				English		PubMed
A novel high-throughput qPCR chip for solving co-infections in RAS farmed rainbow trout	2024	10.1038/s41598-024-65697-8	Recirculating aquaculture systems (RAS) have become more attractive due to reduced water consumption and effluent discharge. However, intensification of production increases the risk of introducing pathogens at farming sites. The emergence of uncultivable pathogens and RAS pathobiome diversity shifts the traditional disease paradigm from “one pathogen, one disease” to complex multiple-pathogen di…	Rna, Ribosomal, 16s; Rna 16s; Animal; Aquaculture; Coinfection; Fish Disease; Genetics; Gill; Microbiology; Microflora; Oncorhynchus Mykiss; Procedures; Real Time Polymerase Chain Reaction; Veterinary Medicine; Virology; Animals; Aquaculture; Coinfection; Fish Diseases; Gills; Microbiota; Real-time Polymerase Chain Reaction; Rna, Ribosomal, 16s	RNA 16S; animal; aquaculture; coinfection; fish disease; genetics; gill; microbiology; microflora; Oncorhynchus mykiss; procedures; real time polymerase chain reaction; veterinary medicine; virology; Animals; Aquaculture; Coinfection; Fish Diseases; Gills; Microbiota; Real-Time Polymerase Chain Reaction; RNA, Ribosomal, 16S	English	Article	Scopus
A novel high-throughput qPCR chip for solving co-infections in RAS farmed rainbow trout	2024	10.1038/s41598-024-65697-8	Recirculating aquaculture systems (RAS) have become more attractive due to reduced water consumption and effluent discharge. However, intensification of production increases the risk of introducing pathogens at farming sites. The emergence of uncultivable pathogens and RAS pathobiome diversity shifts the traditional disease paradigm from one pathogen, one disease to complex multiple-pathogen dise…		SALMON SALMO-SALAR; REAL-TIME PCR; PANCREATIC NECROSIS VIRUS; ATLANTIC SALMON; GILL DISEASE; VALIDATION; SEQUENCES; POXVIRUS; ASSAY; FISH	English	Article	Web of Science
A novel high-throughput qPCR chip for solving co-infections in RAS farmed rainbow trout	2024	10.1038/s41598-024-65697-8						PubMed
A primer for use of genetic tools in selecting and testing the suitability of set-aside sites protected from deep-sea seafloor massive sulfide mining activities	2016	10.1016/j.ocecoaman.2016.01.007	Seafloor massive sulfide (SMS) mining will likely occur at hydrothermal systems in the near future. Alongside their mineral wealth, SMS deposits also have considerable biological value. Active SMS deposits host endemic hydrothermal vent communities, whilst inactive deposits support communities of deep water corals and other suspension feeders. Mining activities are expected to remove all large or…	Connectivity; Hydrothermal Vent; Management; Mining Activity; Population Genetics; Biodiversity; Decision Making; Deposits; Dna; Dna Sequences; Ecosystems; Environmental Management; Hot Springs; Management; Nucleic Acids; Vents; Assessment And Monitoring; Connectivity; Environmental Management Strategy; Hydrothermal Vent; Mining Activities; Mitochondrial Dna (mtdna); Population Genetics; Single N…	Biodiversity; Decision making; Deposits; DNA; DNA sequences; Ecosystems; Environmental management; Hot springs; Management; Nucleic acids; Vents; Assessment and monitoring; Connectivity; Environmental management strategy; Hydrothermal vent; Mining activities; Mitochondrial DNA (mtDNA); Population genetics; Single nucleotide polymorphisms; Deep sea mining; biodiversity; connectivity; conservation …	English	Article	Scopus
A primer for use of genetic tools in selecting and testing the suitability of set-aside sites protected from deep-sea seafloor massive sulfide mining activities	2016	10.1016/j.ocecoaman.2016.01.007	Seafloor massive sulfide (SMS) mining will likely occur at hydrothermal systems in the near future. Alongside their mineral wealth, SMS deposits also have considerable biological value. Active SMS deposits host endemic hydrothermal vent communities, whilst inactive deposits support communities of deep water corals and other suspension feeders. Mining activities are expected to remove all large or…	Hydrothermal vent; Population genetics; Connectivity; Management; Mining activity	ENVIRONMENTAL-IMPACT ASSESSMENT; OXIDASE SUBUNIT-I; HYDROTHERMAL VENTS; RIFTIA-PACHYPTILA; POPULATION; DISPERSAL; PATTERNS; LIFE; DNA; DIFFERENTIATION	English	Article	Web of Science
A refinement to eRNA and eDNA-based detection methods for reliable and cost-efficient screening of pathogens in Atlantic salmon aquaculture	2024	10.1371/journal.pone.0312337	Finfish aquaculture is one of the fastest-growing food production sectors in the world, and numerous infectious diseases are a constant challenge to the fish farming industry, causing decreased fish health and, consequently, economic losses. Specific and sensitive tools for pathogen detection are crucial for the surveillance of environmental samples to prevent the spread of fish pathogens in farm…	Cellulose; Nuclisens; Shimadzu Uv-1800; Tissuelyser Ii; Cellulose; Sea Water; Aquaculture; Article; Disease Control; Dna Extraction; Electroporation; Flow Rate; Food Industry; Genotype; Immunofluorescence; Microorganism Detection; Nonhuman; Rna Binding; Rna Isolation; Rna Sequence; Salmo Salar; Salmonine; Survival Rate; Suspended Particulate Matter; Animal; Diagnosis; Filtration; Fish Disease; Ge…	cellulose; sea water; aquaculture; Article; disease control; DNA extraction; electroporation; flow rate; food industry; genotype; immunofluorescence; microorganism detection; nonhuman; RNA binding; RNA isolation; RNA sequence; Salmo salar; salmonine; survival rate; suspended particulate matter; animal; diagnosis; filtration; fish disease; genetics; microbiology; procedures; Animals; Aquaculture; …	English	Article	Scopus
A review of the use of physical barriers to stop the spread of non-indigenous crayfish species	2020	10.1007/s11160-020-09606-y	Invasive non-indigenous crayfish species (NICS) are a global threat to local flora and fauna. Total eradication of an entire population of invasive NICS is a difficult task; several methods have been tested and are still being used, with varying success. Most methods reduce population size and control the species within the targeted area but do not majorly prevent further spread of NICS. However,…	Management; Migration; Invasive; Fish-passable; Dam; Dispersal	PACIFASTACUS-LENIUSCULUS DANA; INVASIVE SIGNAL CRAYFISH; RED SWAMP CRAYFISH; ENVIRONMENTAL DNA EDNA; PROCAMBARUS-CLARKII CRUSTACEA; BULLHEAD COTTUS-GOBIO; DONANA-NATIONAL-PARK; ASTACUS-ASTACUS; ORCONECTES-LIMOSUS; LONG-TERM	English	Review	Web of Science
A roadmap for metagenomic enzyme discovery	2021	10.1039/d1np00006c	Covering: up to 2021 Metagenomics has yielded massive amounts of sequencing data offering a glimpse into the biosynthetic potential of the uncultivated microbial majority. While genome-resolved information about microbial communities from nearly every environment on earth is now available, the ability to accurately predict biocatalytic functions directly from sequencing data remains challenging. …	Cytochrome P450; Biological Products; Cytochrome P-450 Enzyme System; Enzymes; Biological Product; Cytochrome P450; Enzyme; Amino Acid Sequence; Chemistry; Enzyme Active Site; Isolation And Purification; Machine Learning; Metabolism; Metagenomics; Microflora; Phylogeny; Physiology; Procedures; Amino Acid Sequence; Biological Products; Catalytic Domain; Cytochrome P-450 Enzyme System; Enzymes; Mac…	biological product; cytochrome P450; enzyme; amino acid sequence; chemistry; enzyme active site; isolation and purification; machine learning; metabolism; metagenomics; microflora; phylogeny; physiology; procedures; Amino Acid Sequence; Biological Products; Catalytic Domain; Cytochrome P-450 Enzyme System; Enzymes; Machine Learning; Metagenomics; Microbiota; Phylogeny	English	Review	Scopus
A roadmap for metagenomic enzyme discovery	2021	10.1039/d1np00006c	Covering: up to 2021 Metagenomics has yielded massive amounts of sequencing data offering a glimpse into the biosynthetic potential of the uncultivated microbial majority. While genome-resolved information about microbial communities from nearly every environment on earth is now available, the ability to accurately predict biocatalytic functions directly from sequencing data remains challenging. …		MULTIPLE SEQUENCE ALIGNMENT; BIOSYNTHETIC GENE CLUSTERS; SPONGE THEONELLA-SWINHOEI; MASS-SPECTROMETRY; NATURAL-PRODUCTS; HETEROLOGOUS EXPRESSION; SUBSTRATE-SPECIFICITY; POLYKETIDE SYNTHASE; DIRECTED EVOLUTION; ESCHERICHIA-COLI	English	Review	Web of Science
A roadmap for metagenomic enzyme discovery	2021	10.1039/d1np00006c						PubMed
A spatial matrix factorization method to characterize ecological assemblages as a mixture of unobserved sources: An application to fish eDNA surveys	2024	10.1111/2041-210X.14430	Understanding how ecological assemblages vary in space and time is essential for advancing our knowledge of biodiversity dynamics and ecosystem functioning. Metabarcoding of environmental DNA (eDNA) is an efficient method for documenting biodiversity changes in both marine and terrestrial ecosystems. However, current methods fail to detect and display the biodiversity structure within and between…	Biogeography; Environmental Dna (edna); Fish Communities; Matrix Factorization; Metabarcoding		English	Article	Scopus
A spatial matrix factorization method to characterize ecological assemblages as a mixture of unobserved sources: An application to fish eDNA surveys	2024	10.1111/2041-210X.14430	1. Understanding how ecological assemblages vary in space and time is essential for advancing our knowledge of biodiversity dynamics and ecosystem functioning. Metabarcoding of environmental DNA (eDNA) is an efficient method for documenting biodiversity changes in both marine and terrestrial ecosystems. However, current methods fail to detect and display the biodiversity structure within and betw…	biogeography; environmental DNA (eDNA); fish communities; matrix factorization; metabarcoding	FAST INFERENCE; GENOME SCANS; MARINE; BIODIVERSITY; BIOGEOGRAPHY; DIVERSITY; PATTERNS; REVEAL	English	Article	Web of Science
A Technical Review on Estimating Biomass of Fishes and Mammals: Non-Acoustic and Acoustic Approaches	2020	10.30880/ijie.2020.12.02.032	In marine ecosystem management, estimating biomass of marine species is the most significant challenge to control the ecology and biodiversity of a specified marine area and commercial fishery management. Many topnotch researches have been conducted for estimating the biomass of fishes and mammals. Most of the researches followed mainly two methods namely non-acoustics and acoustics techniques to…	Acoustics Signal; Signal Processing; Fisheries; Aquatics Science; Marine Technology	SOUND PRODUCTION; VISUAL CENSUS; ENVIRONMENTAL DNA; MULTIBEAM SONAR; POPULATION-SIZE; MINNOW TRAPS; INDIVIDUAL RECOGNITION; PASSIVE ACOUSTICS; ECHO-INTEGRATION; TARGET STRENGTH	English	Review	Web of Science
A TECHNICAL REVIEW ON FISH POPULATION ESTIMATION TECHNIQUES: NON-ACOUSTIC AND ACOUSTIC APPROACHES	2019		In marine biodiversity conservation, population size estimation of marine species is the most significant challenge. Many top-notch researches have been conducted for estimating the population size of fish and mammals. Most of the researches followed mainly two methods namely non-acoustics and acoustics techniques to estimate fish population. The non-acoustic technique is an old terminology and a…	Fisheries acoustics; Fish Population Estimation; Cross-correlation; Acoustics	SOUND PRODUCTION; VISUAL CENSUS; ENVIRONMENTAL DNA; MULTIBEAM SONAR; MINNOW TRAPS; INDIVIDUAL RECOGNITION; PASSIVE ACOUSTICS; ECHO-INTEGRATION; TARGET STRENGTH; SIZE	English	Review	Web of Science
A theoretical analysis of taxonomic binning accuracy	2022	10.1111/1755-0998.13608	Many metagenomic and environmental DNA studies require the taxonomic assignment of individual reads or sequences by aligning reads to a reference database, known as taxonomic binning. When a read aligns to more than one reference sequence, it is often classified based on sequence similarity. This step can assign reads to incorrect taxa, at a rate which depends both on the assignment algorithm and…	Coalescent Theory; Environmental Dna; Metagenomics; Taxonomic Binning; Dna, Environmental; Algorithm; Dna Sequence; Metagenome; Metagenomics; Procedures; Software; Algorithms; Dna, Environmental; Metagenome; Metagenomics; Sequence Analysis, Dna; Software	algorithm; DNA sequence; metagenome; metagenomics; procedures; software; Algorithms; DNA, Environmental; Metagenome; Metagenomics; Sequence Analysis, DNA; Software	English	Article	Scopus
A theoretical analysis of taxonomic binning accuracy	2022	10.1111/1755-0998.13608	Many metagenomic and environmental DNA studies require the taxonomic assignment of individual reads or sequences by aligning reads to a reference database, known as taxonomic binning. When a read aligns to more than one reference sequence, it is often classified based on sequence similarity. This step can assign reads to incorrect taxa, at a rate which depends both on the assignment algorithm and…	coalescent theory; environmental DNA; metagenomics; taxonomic binning	READ ALIGNMENT; DNA; FRAMEWORK	English	Article	Web of Science
A theoretical analysis of taxonomic binning accuracy	2022	10.1111/1755-0998.13608						PubMed
A unified model of species abundance, genetic diversity, and functional diversity reveals the mechanisms structuring ecological communities	2021	10.1111/1755-0998.13514	Biodiversity accumulates hierarchically by means of ecological and evolutionary processes and feedbacks. Within ecological communities drift, dispersal, speciation, and selection operate simultaneously to shape patterns of biodiversity. Reconciling the relative importance of these is hindered by current models and inference methods, which tend to focus on a subset of processes and their resulting…	Community Ecology; Community Genetic Diversity; Community Phylogenetics; Comparative Phylogeography; Population Genetics; Biodiversity; Biological Model; Biota; Genetic Variation; Phylogeny; Biodiversity; Biota; Genetic Variation; Models, Biological; Phylogeny	biodiversity; biological model; biota; genetic variation; phylogeny; Biodiversity; Biota; Genetic Variation; Models, Biological; Phylogeny	English	Conference paper	Scopus
A unified model of species abundance, genetic diversity, and functional diversity reveals the mechanisms structuring ecological communities	2021	10.1111/1755-0998.13514	Biodiversity accumulates hierarchically by means of ecological and evolutionary processes and feedbacks. Within ecological communities drift, dispersal, speciation, and selection operate simultaneously to shape patterns of biodiversity. Reconciling the relative importance of these is hindered by current models and inference methods, which tend to focus on a subset of processes and their resulting…	community ecology; community genetic diversity; community phylogenetics; comparative phylogeography; population genetics	NEUTRAL THEORY; POPULATION-GENETICS; BIODIVERSITY; PATTERNS; DIVERSIFICATION; PHYLOGENIES; EVOLUTION; SELECTION; SCALE; RATES	English	Article	Web of Science
A unified model of species abundance, genetic diversity, and functional diversity reveals the mechanisms structuring ecological communities	2021	10.1111/1755-0998.13514						PubMed
A validated protocol for eDNA-based monitoring of within-species genetic diversity in a pond-breeding amphibian	2023	10.1038/s41598-023-31410-4	In light of the dramatic decline in amphibian biodiversity, new cost-efficient tools to rapidly monitor species abundance and population genetic diversity in space and time are urgently needed. It has been amply demonstrated that the use of environmental DNA (eDNA) for single-species detection and characterization of community composition can increase the precision of amphibian monitoring compare…	Dna, Environmental; Dna, Mitochondrial; Mitochondrial Dna; Animal; Anura; Biodiversity; Dna Barcoding; Environmental Monitoring; Genetic Variation; Genetics; Pond; Procedures; Animals; Biodiversity; Dna Barcoding, Taxonomic; Dna, Environmental; Dna, Mitochondrial; Environmental Monitoring; Genetic Variation; Ponds	mitochondrial DNA; animal; Anura; biodiversity; DNA barcoding; environmental monitoring; genetic variation; genetics; pond; procedures; Animals; Biodiversity; DNA Barcoding, Taxonomic; DNA, Environmental; DNA, Mitochondrial; Environmental Monitoring; Genetic Variation; Ponds	English	Article	Scopus
A validated protocol for eDNA-based monitoring of within-species genetic diversity in a pond-breeding amphibian	2023	10.1038/s41598-023-31410-4	In light of the dramatic decline in amphibian biodiversity, new cost-efficient tools to rapidly monitor species abundance and population genetic diversity in space and time are urgently needed. It has been amply demonstrated that the use of environmental DNA (eDNA) for single-species detection and characterization of community composition can increase the precision of amphibian monitoring compare…		ENVIRONMENTAL DNA; CONSERVATION; REPTILES; FROGS; ANURA	English	Article	Web of Science
A validated protocol for eDNA-based monitoring of within-species genetic diversity in a pond-breeding amphibian	2023	10.1038/s41598-023-31410-4						PubMed
Abundance, density, and social structure of African forest elephants (Loxodonta cyclotis) in a human-modified landscape in southwestern Gabon	2020	10.1371/journal.pone.0231832	Population monitoring is critical to effective conservation, but forest living taxa can be difficult to directly observe. This has been true of African forest elephants (Loxodonta cyclotis), for which we have limited information regarding population size and social behavior despite their threatened conservation status. In this study, we estimated demographic parameters using genetic capture-recap…	Dna, Mitochondrial; Environmental Dna; Adult; Article; Demography; Elephant; Female; Forest; Gabon; Haplotype; Human; Human Experiment; Keystone Species; Major Clinical Study; Mitochondrion; Nonhuman; Population Dynamics; Population Size; Savanna; Social Network; Social Structure; Taxon; Animal; Chemistry; Ecosystem Monitoring; Endangered Species; Environmental Protection; Feces; Isolation And Pu…	adult; article; demography; elephant; female; forest; Gabon; haplotype; human; human experiment; keystone species; major clinical study; mitochondrion; nonhuman; population dynamics; population size; savanna; social network; social structure; taxon; animal; chemistry; ecosystem monitoring; endangered species; environmental protection; feces; isolation and purification; male; physiology; procedure…	English	Article	Scopus
Accessing the genomes of uncultivated microbes for novel natural products	2005	10.1007/978-1-59259-976-9_13	Recent findings suggest that only 1% or less of the total number of soil microbial species can be easily cultivated. The fact that uncultured species represent spectacular microbial diversity has sparked great interest in these microorganisms as a potentially prolific source of untapped genetic diversity encoding novel natural products. Multiple approaches are being developed to access this diver…	Biodiversity; Diversity; Environmental Dna Libraries; Heterologous Expression; Highthroughput Screening; Natural Products; Prescreens; Reporter Assays; Soil Microbes; Uncultivated Microorganisms		English	Book chapter	Scopus
Advances in the application of environmental DNA technology in fish ecology; 环境 DNA 技术在鱼类生态学中的应用研究进展	2023	10.20103/j.stxb.202208172362	The decline of global fisheries is one of the major challenges in the 21st century. In recent years, global fish diversity has declined dramatically under the influence of human activities. In order to effectively curb the decline of fish resources, the accurate fish ecological surveys are the top priority. Traditional fish monitoring is based on catch collection and morphological identification,…	Biodiversity; Biomonitoring; Environmental Dna; Fish; Biodiversity; Biomonitoring; Dna; Fish; Spawning; Theoretical Study; China	biodiversity; biomonitoring; DNA; fish; spawning; theoretical study; China	Chinese	Review	Scopus
Advances in ultrahigh-throughput screening for directed enzyme evolution	2020	10.1039/c8cs00981c	Enzymes are versatile catalysts and their synthetic potential has been recognized for a long time. In order to exploit their full potential, enzymes often need to be re-engineered or optimized for a given application. (Semi-) rational design has emerged as a powerful means to engineer proteins, but requires detailed knowledge about structure function relationships. In turn, directed evolution met…		INDUCED GENE-EXPRESSION; IN-VITRO EVOLUTION; STAPHYLOCOCCUS-AUREUS SORTASE; IONIZATION-MASS-SPECTROMETRY; ENVIRONMENTAL DNA LIBRARIES; CELL-SURFACE DISPLAY; BOND-FORMING ENZYMES; ELECTROPHORETIC ANALYSIS; ESCHERICHIA-COLI; SEGMENTED FLOW	English	Review	Web of Science
Age Is Just a Number: No Impacts of Scat Ageing on Single Nucleotide Polymorphism Genotyping Using a Target Capture Approach	2025	10.1002/ece3.71755	Recent advances in DNA sequencing and genotyping technologies are rapidly building our capacity to address ecological, evolutionary, and conservation questions for wildlife. However, wildlife genetic research increasingly relies on samples containing low quantities and quality of DNA, such as non-invasive, archival, and environmental DNA. These samples present unique methodological challenges; fo…	Conservation Genetics; Dna Degradation; Faecal Samples; Koala; Low Quality Genetic Data; Non-invasive Genetic Sampling; Phascolarctos Cinereus; Sample Age; Scat Degradation; Targeted Genotyping		English	Article	Scopus
Age Is Just a Number: No Impacts of Scat Ageing on Single Nucleotide Polymorphism Genotyping Using a Target Capture Approach	2025	10.1002/ece3.71755	Recent advances in DNA sequencing and genotyping technologies are rapidly building our capacity to address ecological, evolutionary, and conservation questions for wildlife. However, wildlife genetic research increasingly relies on samples containing low quantities and quality of DNA, such as non-invasive, archival, and environmental DNA. These samples present unique methodological challenges; fo…	conservation genetics; DNA degradation; faecal samples; koala; low quality genetic data; non-invasive genetic sampling; Phascolarctos cinereus; sample age; scat degradation; targeted genotyping	PCR SUCCESS; SAMPLE AGE; DNA; MICROSATELLITE; COLLECTION; TIME; AMPLIFICATION; DEER; DIET	English	Article	Web of Science
Age Is Just a Number: No Impacts of Scat Ageing on Single Nucleotide Polymorphism Genotyping Using a Target Capture Approach	2025	10.1002/ece3.71755						PubMed
Aligning molecular studies of mycorrhizal fungal diversity with ecologically important levels of diversity in ecosystems	2016	10.1038/ismej.2016.73	Arbuscular mycorrhizal fungi (AMF) occur in the roots of most plants and are an ecologically important component of the soil microbiome. Richness of AMF taxa is a strong driver of plant diversity and productivity, thus providing a rationale for characterizing AMF diversity in natural ecosystems. Consequently, a large number of molecular studies on AMF community composition are currently underway.…	Arbuscular Mycorrhiza; Ecosystem Dynamics; Ecosystem Function; Experimental Study; Fungus; Genetic Variation; Molecular Analysis; Net Ecosystem Production; Plant Community; Soil Microorganism; Species Diversity; Species Richness; Fungi; Biodiversity; Classification; Ecosystem; Genetics; Isolation And Purification; Microbiology; Mycorrhiza; Plant; Biodiversity; Ecosystem; Mycorrhizae; Plants; Soil…	arbuscular mycorrhiza; ecosystem dynamics; ecosystem function; experimental study; fungus; genetic variation; molecular analysis; net ecosystem production; plant community; soil microorganism; species diversity; species richness; Fungi; biodiversity; classification; ecosystem; genetics; isolation and purification; microbiology; mycorrhiza; plant; Biodiversity; Ecosystem; Mycorrhizae; Plants; Soil…	English	Review	Scopus
Aligning molecular studies of mycorrhizal fungal diversity with ecologically important levels of diversity in ecosystems	2016	10.1038/ismej.2016.73	Arbuscular mycorrhizal fungi (AMF) occur in the roots of most plants and are an ecologically important component of the soil microbiome. Richness of AMF taxa is a strong driver of plant diversity and productivity, thus providing a rationale for characterizing AMF diversity in natural ecosystems. Consequently, a large number of molecular studies on AMF community composition are currently underway.…		HIGH FUNCTIONAL DIVERSITY; GENETIC-VARIABILITY; PLANT-ROOTS; COMMUNITIES; POPULATION; ECOLOGY; SCALE	English	Article	Web of Science
Aligning molecular studies of mycorrhizal fungal diversity with ecologically important levels of diversity in ecosystems	2016	10.1038/ismej.2016.73						PubMed
Allometric scaling of eDNA production in stream-dwelling brook trout (Salvelinus fontinalis) inferred from population size structure	2021	10.1002/edn3.150	Environmental DNA (eDNA) concentration exhibits a positive correlation with organism abundance in nature, but modeling this relationship could be substantially improved by incorporating the biology of eDNA production. A recent model (Molecular Ecology, 10.1111/mec.15543) extended models of physiological allometric scaling to eDNA production, hypothesizing that brook trout eDNA production scales n…	Abundance; Allometric Scaling; Allometry; Biomass; Brook Trout; Edna; Fishes		English	Article	Scopus
An annotated reference library for supporting DNA metabarcoding analysis of aquatic macroinvertebrates in French freshwater environments	2025	10.3897/mbmg.9.137772	Freshwater ecosystems are increasingly threatened by human activities, leading to biodiversity loss and ecosystem degradation. Effective biodiversity monitoring, particularly through the use of aquatic macroinvertebrates as bioindicators, is crucial for assessing ecological health. While traditional morphological methods face limitations, DNA metabarcoding offers higher accuracy and efficiency in…	Coi; Cryptic Diversity; Freshwater; Fwhf2 Primers; Gap Analysis; Haplotype Diversity; Macroinvertebrates; Metabarcoding		English	Article	Scopus
An annotated reference library for supporting DNA metabarcoding analysis of aquatic macroinvertebrates in French freshwater environments	2025	10.3897/mbmg.9.137772	Freshwater ecosystems are increasingly threatened by human activities, leading to biodiversity loss and ecosystem degradation. Effective biodiversity monitoring, particularly through the use of aquatic macroinvertebrates as bioindicators, is crucial for assessing ecological health. While traditional morphological methods face limitations, DNA metabarcoding offers higher accuracy and efficiency in…	COI; cryptic diversity; freshwater; fwhF2 primers; gap analysis; haplotype; diversity; macroinvertebrates; metabarcoding	BIODIVERSITY ASSESSMENT; ECOLOGICAL QUALITY; MOLECULAR TOOLS; TAXONOMY; STREAMS; IDENTIFICATION; COMMUNITIES; PHYLOGENY; BEETLES; BARCODE	English	Article	Web of Science
An apparent Acanthamoeba genotype is the product of a chimeric 18S rDNA artifact	2018	10.1007/s00436-017-5690-9	Free-living amoebae of the genus Acanthamoeba are potentially pathogenic protozoa widespread in the environment. The detection/diagnosis as well as environmental survey strategies is mainly based on the identification of the 18S rDNA sequences of the strains that allow the recovery of various distinct genotypes/subgenotypes. The accurate recording of such data is important to better know the envi…	Acanthamoeba; Acanthamoeba Genotype; Chimeric Sequences; Environmental Dna; Dna, Protozoan; Dna, Ribosomal; Rna, Ribosomal, 18s; Dna 18s; Protozoal Dna; Ribosome Dna; Rna 18s; Acanthamoeba; Article; Cercozoa; Chimera; Genotype; Molecular Phylogeny; Nematode; Nonhuman; Phylogeny; Priority Journal; Classification; Genetics; Isolation And Purification; Chimera; Dna, Protozoan; Dna, Ribosomal; Genoty…	DNA 18S; protozoal DNA; ribosome DNA; RNA 18S; Acanthamoeba; Article; Cercozoa; chimera; genotype; molecular phylogeny; nematode; nonhuman; phylogeny; priority journal; classification; genetics; isolation and purification; Chimera; DNA, Protozoan; DNA, Ribosomal; Genotype; Phylogeny; RNA, Ribosomal, 18S	English	Article	Scopus
An apparent Acanthamoeba genotype is the product of a chimeric 18S rDNA artifact	2018	10.1007/s00436-017-5690-9	Free-living amoebae of the genus Acanthamoeba are potentially pathogenic protozoa widespread in the environment. The detection/diagnosis as well as environmental survey strategies is mainly based on the identification of the 18S rDNA sequences of the strains that allow the recovery of various distinct genotypes/subgenotypes. The accurate recording of such data is important to better know the envi…	Acanthamoeba; Acanthamoeba genotype; Environmental DNA; Chimeric sequences	SP-NOV; IDENTIFICATION; PHYLOGENY; DIVERSITY; CERCOZOA; GENUS; PCR; AMOEBOZOA; EVOLUTION; FREQUENCY	English	Article	Web of Science
An apparent Acanthamoeba genotype is the product of a chimeric 18S rDNA artifact	2018	10.1007/s00436-017-5690-9						PubMed
An easy phylogenetically informative method to trace the globally invasive potamopyrgus mud snail from river's eDNA	2016	10.1371/journal.pone.0162899	Potamopyrgus antipodarum (New Zealand mud snail) is a prosobranch mollusk native to New Zealand with a wide invasive distribution range. Its non-indigenous populations are reported from Australia, Asia, Europe and North America. Being an extremely tolerant species, Potamopyrgus is capable to survive in a great range of salinity and temperature conditions, which explains its high invasiveness and …	Dna; Cytochrome C Oxidase; Dna; Dna Primers; Electron Transport Complex Iv; Rna, Ribosomal, 16s; Dna; Dna 16s; Dna Fragment; Environmental Dna; Unclassified Drug; Cytochrome C Oxidase; Primer Dna; Rna 16s; Animal Tissue; Article; Clonal Reproduction; Controlled Study; Dna Sequence; Gene Amplification; Haplotype; High Throughput Sequencing; Invasive Species; Nonhuman; Phylogeny; Polymerase Chain R…	DNA; DNA 16S; DNA fragment; environmental DNA; unclassified drug; cytochrome c oxidase; primer DNA; RNA 16S; animal tissue; Article; clonal reproduction; controlled study; DNA sequence; gene amplification; haplotype; high throughput sequencing; invasive species; nonhuman; phylogeny; polymerase chain reaction; Potamopyrgus antipodarum; reproduction; river; river basin; snail; Spain; species distri…	English	Article	Scopus
An Easy Phylogenetically Informative Method to Trace the Globally Invasive Potamopyrgus Mud Snail from River's eDNA	2016	10.1371/journal.pone.0162899	Potamopyrgus antipodarum (New Zealand mud snail) is a prosobranch mollusk native to New Zealand with a wide invasive distribution range. Its non-indigenous populations are reported from Australia, Asia, Europe and North America. Being an extremely tolerant species, Potamopyrgus is capable to survive in a great range of salinity and temperature conditions, which explains its high invasiveness and …		NEW-ZEALAND MUDSNAILS; ANTIPODARUM HYDROBIIDAE; ENVIRONMENTAL DNA; MITOCHONDRIAL-DNA; MOLLUSCA; SALINITY; INVERTEBRATES; BIODIVERSITY; GASTROPOD; ABUNDANCE	English	Article	Web of Science
An Easy Phylogenetically Informative Method to Trace the Globally Invasive Potamopyrgus Mud Snail from River's eDNA	2016	10.1371/journal.pone.0162899						PubMed
An efficient and robust laboratory workflow and tetrapod database for larger scale environmental DNA studies	2019	10.1093/gigascience/giz029	The use of environmental DNA for species detection via metabarcoding is growing rapidly. We present a co-designed lab workflow and bioinformatic pipeline to mitigate the 2 most important risks of environmental DNA use: sample contamination and taxonomic misassignment. These risks arise from the need for polymerase chain reaction (PCR) amplification to detect the trace amounts of DNA combined with…	Environmental Dna; Invertebrate-derived -dna; Leeches; Metabarcoding; Environmental Dna; Amplicon; Article; Biodiversity; Bioinformatics; Controlled Study; Dna Barcoding; Dna Extraction; Dna Fragmentation; Dna Replication; Haplotype; Laboratory Technique; Laboratory Workflow; Nonhuman; Polymerase Chain Reaction; Priority Journal; Reference Database; Sequence Alignment; Biology; Laboratory; Metage…	environmental DNA; amplicon; Article; biodiversity; bioinformatics; controlled study; DNA barcoding; DNA extraction; DNA fragmentation; DNA replication; haplotype; laboratory technique; laboratory workflow; nonhuman; polymerase chain reaction; priority journal; reference database; sequence alignment; biology; laboratory; metagenome; metagenomics; nucleic acid database; procedures; quality control…	English	Article	Scopus
An enrichment-based capture method from nuclear environmental DNA presents new opportunities for population genomics: A case study on the common frog	2025	10.1111/2041-210X.70039	Population genetics is a powerful tool for studying evolutionary processes and informing conservation biology. Traditional approaches typically rely on tissue sampling, which poses challenges in aquatic environments where specimen collection is often difficult. Recent efforts to conduct non-invasive studies using environmental DNA (eDNA) have shown promise but face limitations. For instance, the …	Edna; Hyrad; Intraspecific Population Structure; Nuclear Snps		English	Article	Scopus
An enrichment-based capture method from nuclear environmental DNA presents new opportunities for population genomics: A case study on the common frog	2025	10.1111/2041-210X.70039	Population genetics is a powerful tool for studying evolutionary processes and informing conservation biology. Traditional approaches typically rely on tissue sampling, which poses challenges in aquatic environments where specimen collection is often difficult. Recent efforts to conduct non-invasive studies using environmental DNA (eDNA) have shown promise but face limitations. For instance, the …	eDNA; hyRAD; intraspecific population structure; nuclear SNPs	R-PACKAGE; FORMAT	English	Article	Web of Science
An environmental DNA sampling method for aye-ayes from their feeding traces	2018	10.1002/ece3.4341	Noninvasive sampling is an important development in population genetic monitoring of wild animals. Particularly, the collection of environmental DNA (eDNA) which can be collected without needing to encounter the target animal facilitates the genetic analysis of endangered species. One method that has been applied to these sample types is target capture and enrichment which overcomes the issue of …	Endangered; Environmental Dna; Lemur; Mitogenome; Noninvasive Sampling; Target Capture		English	Article	Scopus
An environmental DNA sampling method for aye-ayes from their feeding traces	2018	10.1002/ece3.4341	Noninvasive sampling is an important development in population genetic monitoring of wild animals. Particularly, the collection of environmental DNA (eDNA) which can be collected without needing to encounter the target animal facilitates the genetic analysis of endangered species. One method that has been applied to these sample types is target capture and enrichment which overcomes the issue of …	endangered; environmental DNA; lemur; mitogenome; noninvasive sampling; target capture	GENOMICS; WILD; LEMUR; IDENTIFICATION; DAUBENTONIA; CAPTURE; TOOL; PCR; ASSOCIATION; FRAMEWORK	English	Article	Web of Science
An environmental DNA sampling method for aye-ayes from their feeding traces	2018	10.1002/ece3.4341						PubMed
An Evolutionary Link between Natural Transformation and CRISPR Adaptive Immunity	2012	10.1128/mBio.00309-12	Natural transformation by competent bacteria is a primary means of horizontal gene transfer; however, evidence that competence drives bacterial diversity and evolution has remained elusive. To test this theory, we used a retrospective comparative genomic approach to analyze the evolutionary history of Aggregatibacter actinomycetemcomitans, a bacterial species with both competent and noncompetent …		HORIZONTAL GENE-TRANSFER; GENOME SEQUENCE; DNA-BINDING; COMPETENCE; PROTEIN; INTERFERENCE; MECHANISMS; RESISTANCE; SEROTYPE; STRAIN	English	Article	Web of Science
An evolutionary link between natural transformation and CRISPR adaptive immunity	2012	10.1128/mBio.00309-12						PubMed
An expanded mammal mitogenome dataset from Southeast Asia	2017	10.1093/gigascience/gix053	Southeast (SE) Asia is 1 of the most biodiverse regions in the world, and it holds approximately 20% of all mammal species. Despite this, the majority of SE Asia's genetic diversity is still poorly characterized. The growing interest in using environmental DNA to assess and monitor SE Asian species, in particular threatened mammals-has created the urgent need to expand the available reference dat…	Genbanktaxonomic Assignment; Invertebrate-derived (idna); Metabarcoding; Genomic Dna; Article; Biodiversity; Dna Barcoding; Dna Isolation; Gene Sequence; Genetic Variability; Geographic Distribution; Information Center; Information Processing; Mammalian Genetics; Mitochondrial Genome; Nonhuman; Phylogeny; Priority Journal; Southeast Asia; Taxonomy; Animal; Biology; Genetic Variation; Genetics; Ge…	genomic DNA; Article; biodiversity; DNA barcoding; DNA isolation; gene sequence; genetic variability; geographic distribution; information center; information processing; mammalian genetics; mitochondrial genome; nonhuman; phylogeny; priority journal; Southeast Asia; taxonomy; animal; biology; genetic variation; genetics; genomics; mammal; molecular genetics; nucleic acid database; phylogeography…	English	Article	Scopus
An expanded mammal mitogenome dataset from Southeast Asia	2017	10.1093/gigascience/gix053	Background: Southeast (SE) Asia is one of the most biodiverse regions in the world and it holds approximately 20% of all mammal species. Despite this, the majority of SE Asia's genetic diversity is still poorly characterised. The growing interest in using environmental DNA (eDNA) to assess and monitor SE Asian species, in particular threatened mammals - has created the urgent need to expand the a…	invertebrate-derived (iDNA); metabarcoding; GenBank; Taxonomic assignment	SEQUENCE ALIGNMENT; DNA; GENOMES; TOOL	English	Article	Web of Science
An expanded mammal mitogenome dataset from Southeast Asia	2017	10.1093/gigascience/gix053						PubMed
An INDEL genomic approach to explore population diversity of phytoplankton	2024	10.1186/s12864-024-10896-w	Background: Although metabarcoding and metagenomic approaches have generated large datasets on worldwide phytoplankton species diversity, the intraspecific genetic diversity underlying the genetic adaptation of marine phytoplankton to specific environmental niches remains largely unexplored. This is mainly due to the lack of biological resources and tools for monitoring the dynamics of this diver…	Bathycoccus; Bloom; Genotyping; Intraspecific Diversity; Phytoplankton; Bd Accuri C6; Pcr Clean Up Kit; Plant Dnaeasy; Environmental Dna; Allele; Article; Dna Extraction; Evolutionary Adaptation; Flow Cytometry; Gene Sequence; Genetic Variability; Genome Analysis; Genomics; Genotype; Genotyping; Intestine Flora; Microbial Community; Nonhuman; Phytoplankton; Polymerase Chain Reaction; Population D…	environmental DNA; allele; Article; DNA extraction; evolutionary adaptation; flow cytometry; gene sequence; genetic variability; genome analysis; genomics; genotype; genotyping; intestine flora; microbial community; nonhuman; phytoplankton; polymerase chain reaction; population dynamics; prevalence; ribotyping; Sanger sequencing; sea surface temperature; sequence analysis; single nucleotide polym…	English	Article	Scopus
An INDEL genomic approach to explore population diversity of phytoplankton	2024	10.1186/s12864-024-10896-w	BackgroundAlthough metabarcoding and metagenomic approaches have generated large datasets on worldwide phytoplankton species diversity, the intraspecific genetic diversity underlying the genetic adaptation of marine phytoplankton to specific environmental niches remains largely unexplored. This is mainly due to the lack of biological resources and tools for monitoring the dynamics of this diversi…	Phytoplankton; Bathycoccus; Intraspecific diversity; Genotyping; Bloom	GENETIC DIVERSITY; BIOGEOGRAPHY; BLOOMS	English	Article	Web of Science
An INDEL genomic approach to explore population diversity of phytoplankton	2024	10.1186/s12864-024-10896-w						PubMed
Analysis of gut microbiota and environmental safety of gene-edited half-smooth tongue sole (Cynoglossus semilaevis); 基因编辑半滑舌鳎的肠道菌群与环境安全性分析	2025	10.12264/JFSC2024-0371	Half-smooth tongue sole (Cynoglossus semilaevis) is a unique marine aquaculture fish species known for its high nutritional value and commercial potential. However, half-smooth tongue sole exhibits typical sexual dimorphism, characterized by substantially faster growth rates in females than in males, resulting in female adults being two to four times heavier than male adults. Previous studies hav…	Cynoglossus Semilaevis; Edna; Environmental Safety Assessment; Gene Editing; Gut Microbiota		English	Article	Scopus
Analysis of human mitochondrial DNA sequences from fecally polluted environmental waters as a tool to study population diversity	2017	10.3934/environsci.2017.3.443	Mitochondrial signature sequences have frequently been used to study human population diversity around the world. Traditionally, this requires obtaining samples directly from individuals which is cumbersome, time consuming and limited to the number of individuals that participated in these types of surveys. Here, we used environmental DNA extracts to determine the presence and sequence variabilit…	Environmental Waters; Fecal Pollution; High-throughput Sequencing; Human Mitochondrial Dna; Population Diversity		English	Article	Scopus
Analysis of human mitochondrial DNA sequences from fecally polluted environmental waters as a tool to study population diversity	2017	10.3934/environsci.2017.3.443	Mitochondrial signature sequences have frequently been used to study human population diversity around the world. Traditionally, this requires obtaining samples directly from individuals which is cumbersome, time consuming and limited to the number of individuals that participated in these types of surveys. Here, we used environmental DNA extracts to determine the presence and sequence variabilit…	Human mitochondrial DNA; fecal pollution; environmental waters; high-throughput sequencing; population diversity	HYPERVARIABLE REGION II; HUMAN-EVOLUTION; GENOME DATABASE; NEAR-EASTERN; PUERTO-RICO; INDICATORS; TRACKING; DISEASE; PCR	English	Article	Web of Science
Analysis of human mitochondrial DNA sequences from fecally polluted environmental waters as a tool to study population diversity	2017	10.3934/environsci.2017.3.443						PubMed
Ancient DNA as a Tool for Navigating the Anthropocene	2017	10.1111/cuag.12098	Ancient DNA (aDNA) analysis has led to significant breakthroughs in our understanding of the origin of our own species as well as that of many commensal and wild species. New approaches in aDNA research promise to make it a major tool for adaptation to and mitigation of the impacts of the rapidly changing climates of the Anthropocene. This article reviews a number of these new lines of research a…	ancient DNA (aDNA); archeology; zooarcheology; anthropocene; climate changeadaptation and mitigation	BASE-LINE SYNDROME; LAND-USE CHANGE; DE-EXTINCTION; ENVIRONMENTAL DNA; CONSERVATION; CATTLE; BIODIVERSITY; DOMESTICATION; PERSPECTIVE; SEDIMENTS	English	Review	Web of Science
Ancient DNA from bulk bone reveals past genetic diversity of vertebrate fauna on Kangaroo Island, Australia	2021	10.1016/j.quascirev.2021.106962	It is indisputable that much of Australia's modern biodiversity decline was triggered by European settlement. However, the driver(s) of pre-European extinctions and extirpations are more challenging to identify, particularly on islands where animals are faced with the additional pressures imposed by isolation. Kangaroo Island, South Australia, has been identified as a potential haven for the rein…	Ancient Dna; Bulk Bone; Environmental Dna; Kangaroo Island; Metabarcoding; Palaeontology; Paleoenvironmental Reconstruction; Biodiversity; Bone; Mammals; Ancient Dna; Australia; Bulk Bone; Environmental Dna; Genetics Diversities; Kangaroo Islands; Metabarcoding; Palaeontology; Paleoenvironmental Reconstruction; South Australia; Dna; Biodiversity; Bird; Bone; Endangered Species; Extinction; Fish; …	Biodiversity; Bone; Mammals; Ancient DNA; Australia; Bulk bone; Environmental DNA; Genetics diversities; Kangaroo islands; Metabarcoding; Palaeontology; Paleoenvironmental reconstruction; South Australia; DNA; biodiversity; bird; bone; endangered species; extinction; fish; genetic variation; Holocene; mammal; Pleistocene; population decline; reintroduction; reptile; Kangaroo Island; Dasyurus macu…	English	Article	Scopus
Ancient DNA from bulk bone reveals past genetic diversity of vertebrate fauna on Kangaroo Island, Australia	2021	10.1016/j.quascirev.2021.106962	It is indisputable that much of Australias modern biodiversity decline was triggered by European settlement. However, the driver(s) of pre-European extinctions and extirpations are more challenging to identify, particularly on islands where animals are faced with the additional pressures imposed by isolation. Kangaroo Island, South Australia, has been identified as a potential haven for the reint…	Ancient DNA; Metabarcoding; Bulk bone; Paleoenvironmental reconstruction; Environmental DNA; Palaeontology; Kangaroo island	MEGAFAUNA; DECLINE; CLIMATE; PRESERVATION; MARSUPIALIA; EXTINCTION; SETTLEMENT; MAMMALS	English	Article	Web of Science
Ancient Human Genomes and Environmental DNA from the Cement Attaching 2,000-Year-Old Head Lice Nits	2022	10.1093/molbev/msab351	Over the past few decades, there has been a growing demand for genome analysis of ancient human remains. Destructive sampling is increasingly difficult to obtain for ethical reasons, and standard methods of breaking the skull to access the petrous bone or sampling remaining teeth are often forbidden for curatorial reasons. However, most ancient humans carried head lice and their eggs abound in hi…	Adna; Ancient Head Lice; Ancient Host Genomes; Merkel Cell Polyomavirus; Dna, Environmental; Ancient Dna; Cement; Environmental Dna; Genomic Dna; Mitochondrial Dna; Amplified Fragment Length Polymorphism; Article; Bacterium Contamination; Bioinformatics; Confocal Microscopy; Cytogenetic Analysis; Dna Damage; Dna Extraction; Dna Sequencing; Ectoparasite; Female; Fluorescence Microscopy; Genetic An…	ancient DNA; cement; environmental DNA; genomic DNA; mitochondrial DNA; amplified fragment length polymorphism; Article; bacterium contamination; bioinformatics; confocal microscopy; cytogenetic analysis; DNA damage; DNA extraction; DNA sequencing; ectoparasite; female; fluorescence microscopy; genetic analysis; genetic variability; genome analysis; genotype; hair; haplotype; human genome; louse;…	English	Article	Scopus
Antibioflm effects of extracellular matrix degradative agents on the biofilm of different strains of multi-drug resistant Corynebacterium striatum	2022	10.1186/s12941-022-00546-y	Background: Corynebacterium striatum is a microorganism with an excellent capacity for biofilm production and thus has been correlated with nosocomial transmission and invasive infections. However, little is known about the mechanism of biofilm formation of this commensal pathogen. In this study, we aimed to investigate the biofilm formation abilities of multidrug-resistant Corynebacterium striat…	Biofilm Formation; Corynebacterium Striatum; Edna; Exopolysaccharides; Extracellular Proteins; Multi-drug Resistance; Cefepime; Ceftriaxone; Ciprofloxacin; Clindamycin; Cotrimoxazole; Daptomycin; Deoxyribonuclease I; Erythromycin; Gentamicin; Levofloxacin; Linezolid; Meropenem; Proteinase K; Tetracycline; Vancomycin; Anti-bacterial Agents; Deoxyribonuclease I; Endopeptidase K; Rna, Ribosomal, 16s…	antiinfective agent; cefepime; ceftriaxone; ciprofloxacin; clindamycin; cotrimoxazole; daptomycin; deoxyribonuclease I; erythromycin; genomic DNA; gentamicin; levofloxacin; linezolid; meropenem; proteinase K; RNA 16S; tetracycline; vancomycin; Acinetobacter baumannii; adult; antibiofilm activity; antibiotic resistance; antibiotic sensitivity; Article; bacteremia; bacterial genome; bacterial strai…	English	Article	Scopus
Antibioflm effects of extracellular matrix degradative agents on the biofilm of different strains of multi-drug resistant Corynebacterium striatum	2022	10.1186/s12941-022-00546-y	Background Corynebacterium striatum is a microorganism with an excellent capacity for biofilm production and thus has been correlated with nosocomial transmission and invasive infections. However, little is known about the mechanism of biofilm formation of this commensal pathogen. In this study, we aimed to investigate the biofilm formation abilities of multidrug-resistant Corynebacterium striatu…	Corynebacterium striatum; Biofilm formation; Multi-drug resistance; Extracellular proteins; Exopolysaccharides; eDNA	POLY-N-ACETYLGLUCOSAMINE; STAPHYLOCOCCUS-EPIDERMIDIS; COMPONENT; DNA	English	Article	Web of Science
Antibioflm effects of extracellular matrix degradative agents on the biofilm of different strains of multi-drug resistant Corynebacterium striatum	2022	10.1186/s12941-022-00546-y						PubMed
Application of eDNA Metabarcoding for Detecting Anura on a Tropical Island	2021	10.3390/d13090440	As anuran biodiversity quickly declines, it is important to understand local patterns of anuran occurrence. However, the limitations of traditional sampling methods make anuran biodiversity surveys inadequate. Tropical environments are rich in anuran species, which makes biodiversity measurements more difficult. Therefore, it is important to develop a rapid, inexpensive and nondestructive method …	eDNA; Anura; metabarcoding; tropical; biodiversity	ENVIRONMENTAL DNA; ZHOUSHAN ARCHIPELAGO; SPECIES RICHNESS; POPULATION-SIZE; CONSERVATION; COMMUNITIES; EXTINCTION; AMPHIBIANS; TIME	English	Article	Web of Science
Application of eDNA technology for monitoring megalopa resources of Eriocheir sinensis in the Yangtze River estuary; eDNA 技术在长江口中华绒螯蟹蟹苗资源监测上的应用	2024	10.12264/JFSC2024-0170	Eriocheir sinensis is an important economic species in China. It is widely distributed in the Yellow River, Yangtze River, and other river basins in China. It exhibits distinct feeding migrations and reproductive migrations. However, since the implementation of a 10-year fishing ban in the Yangtze River, it has been difficult to obtain fishery data. Therefore, a new method for monitoring E. sinen…	Edna; Eriocheir Sinensis; Megalopa; Qpcr; Yangtze River Estuary		English	Article	Scopus
Application of environmental DNA technology in natural reproduction of the four major Chinese carps in Yichang section of Yangtzi River, China	2021	10.13287/j.1001-9332.202106.037				Chinese		PubMed
Application of environmental DNA technology in natural reproduction of the four major Chinese carps in Yichang section of Yangtzi River, China; 环境DNA技术在宜昌江段四大家鱼自然繁殖中的应用	2021	10.13287/j.1001-9332.202106.037	We explored the sample collection and DNA extraction method of environmental DNA (eDNA) technique. Droplet digital PCR (ddPCR) was used to detect the eDNA concentration of the four major Chinese carps in different water layers and different cross-sections of Yichang section of Yangtze River trunk stream. We analyzed the relationship between eDNA concentration and density of egg and fry, and explo…	Ddpcr; Environmental Dna; Spawning Behavior; Spawning Ground; Environmental Dna; Concentration (composition); Cyprinid; Detection Method; Dna Fingerprinting; Extraction Method; Spawning Ground; China; Hubei; Yangtze River; Yichang; Varanidae; Animal; Carp; Environmental Monitoring; Reproduction; Technology; Animals; Carps; Environmental Dna; Environmental Monitoring; Reproduction; Technology	concentration (composition); cyprinid; detection method; DNA fingerprinting; extraction method; spawning ground; China; Hubei; Yangtze River; Yichang; Varanidae; animal; carp; environmental monitoring; reproduction; technology; Animals; Carps; Environmental DNA; Environmental Monitoring; Reproduction; Technology	Chinese	Article	Scopus
Application of genomics technology in biodiversity conservation research	2022	10.17520/biods.2022441	Background: Research techniques in molecular biology, cell biology, microbiology and genetics have been accelerated by rapid development of modern genomic technologies. These advances have rapidly evolved the field of biodiversity research, once a branch of natural history focusing on morphology, into an integrated life science. Modern biodiversity studies can now investigate and link element of …	Dna Barcoding; Dna Sequencing; Genomics; Species Diversity		Chinese	Article	Scopus
Application of next generation semiconductor-based sequencing for the identification of apis mellifera complementary sex determiner (Csd) alleles from honey dna	2021	10.3390/insects12100868	The complementary sex determiner (csd) gene plays an essential role in the sex determination of Apis mellifera L. Females develop only if fertilized eggs have functional heterozygous genotypes at this gene whereas males, being haploids, are hemizygous. Two identical csd alleles produce non vital males. In light of the recent decline in honey bee populations, it is therefore important to monitor t…	Environmental Dna; Genetic Diversity; Honey Bee; Inbreeding; Polymorphism; Population Genomics; Variability		English	Article	Scopus
Application of Next Generation Semiconductor-Based Sequencing for the Identification of Apis mellifera Complementary Sex Determiner (csd) Alleles from Honey DNA	2021	10.3390/insects12100868	Simple Summary: Honey contains traces of the DNA of the honey bees that produced it. This environmental DNA can therefore be used to investigate the genome of the honey bees. In this study, we used a next generation sequencing technology to analyze the variability of a key gene of Apis mellifera L., the complementary sex determiner (csd) gene, using honey environmental DNA as a source of honey be…	environmental DNA; genetic diversity; honey bee; inbreeding; polymorphism; population genomics; variability	SPECIES IDENTIFICATION; HOMO-HETEROZYGOSITY; COLONY POPULATIONS; BEES; GENE; NUMBER; AUTHENTICATION; EVOLUTIONARY; SELECTION; ALIGNMENT	English	Article	Web of Science
Application of Next Generation Semiconductor-Based Sequencing for the Identification of Apis mellifera Complementary Sex Determiner (csd) Alleles from Honey DNA	2021	10.3390/insects12100868						PubMed
Application of Omics Tools in Designing and Monitoring Marine Protected Areas For a Sustainable Blue Economy	2022	10.3389/fgene.2022.886494	A key component of the global blue economy strategy is the sustainable extraction of marine resources and conservation of marine environments through networks of marine protected areas (MPAs). Connectivity and representativity are essential factors that underlie successful implementation of MPA networks, which can safeguard biological diversity and ecosystem function, and ultimately support the b…	Connectivity; Conservation Planning; Environmental Dna (edna); Marine Conservation; Metabarcoding; Population Genomics; Environmental Dna; Article; Biodiversity; Biogeography; Bioinformatics; Climate Change Vulnerability; Copy Number Variation; Dna Barcoding; Dna Methylation; Economic Aspect; Edna Metabarcoding; Epigenetics; Gene Mapping; Gene Structure; Genetic Variability; Genotyping; Geographi…	environmental DNA; Article; biodiversity; biogeography; bioinformatics; climate change vulnerability; copy number variation; DNA barcoding; DNA methylation; economic aspect; eDNA metabarcoding; epigenetics; gene mapping; gene structure; genetic variability; genotyping; geographic distribution; haplotype; human impact (environment); marine environment; metabolomics; metagenomics; microbial communi…	English	Review	Scopus
APPLICATIONS OF ENVIRONMENTAL DNA IN LAKE BIODIVERSITY	2022	10.7541/2021.2020.237	Lake is indispensable part of inland water ecosystem, and China harbors numerous lakes with rich biodiversity. In recent years, the degradation of lakes severely lead to the decreasing of level of biodiversity. Therefore, lake biodiversity has always been a research hot-spot in limnology. All efforts to research on lake biodiversity essentially depend on monitoring species composition, population…	Challenges And Prospects; Environmental Dna; Experimental Design; Lake Biodiversity; Biodiversity; Dna; Experimental Study; Morphology; Size Distribution; China	biodiversity; DNA; experimental study; morphology; size distribution; China	Chinese	Article	Scopus
Applications of Next-Generation Sequencing Technologies and Computational Tools in Molecular Evolution and Aquatic Animals Conservation Studies: A Short Review	2019	10.1177/1176934319892284	Aquatic ecosystems that form major biodiversity hotspots are critically threatened due to environmental and anthropogenic stressors. We believe that, in this genomic era, computational methods can be applied to promote aquatic biodiversity conservation by addressing questions related to the evolutionary history of aquatic organisms at the molecular level. However, huge amounts of genomics data ge…	Bioinformatics; molecular evolution; aquatic animals; conservation; genomics	POPULATION-GENETICS ANALYSES; ENVIRONMENTAL DNA; GENOMICS; MANAGEMENT; FISHES; EDNA	English	Review	Web of Science
Applications of phylogenetics to solve practical problems in insect conservation	2016	10.1016/j.cois.2016.09.005	Phylogenetic approaches have much promise for the setting of conservation priorities and resource allocation. There has been significant development of analytical methods for the measurement of phylogenetic diversity within and among ecological communities as a way of setting conservation priorities. Application of these tools to insects has been low as has been the uptake by conservation manager…		NEW-ZEALAND; GENETIC DIVERSITY; SPATIAL-ANALYSIS; WETA ORTHOPTERA; BIODIVERSITY; ISLAND; PERSPECTIVE; ARTHROPODS; MANAGEMENT; HISTORY	English	Article	Web of Science
Applied Hedgehog Conservation Research	2024	10.3390/ani14060976	[No abstract available]	Environmental Dna; Conservation Biology; Disease Transmission; Ecological Niche; Editorial; Environmental Factor; Genetic Variability; Hedgehog; Heterozygosity; Hibernation; Hygiene; Livestock; Nonhuman; Public Health; Risk Factor; Wildlife	environmental DNA; conservation biology; disease transmission; ecological niche; Editorial; environmental factor; genetic variability; hedgehog; heterozygosity; hibernation; hygiene; livestock; nonhuman; public health; risk factor; wildlife	English	Editorial	Scopus
Archaeozoology Supports a Holistic View on Fish Assessments in Large Rivers-A Case Study from the Volga River: From Quantitative Data and Ancient DNA to Biodiversity Analysis	2024	10.3390/w16081109	Knowledge of the historical and present dynamics of populations of migratory fish can promote our understanding of factors affecting their recruitment and abundance. Taxonomic identification of 23,802 bone remains and 13,539 scales of fish from 30 archaeological sites along Volga River revealed that they belonged to 41 different fish species. These data allow for retrospective comparisons and hig…	archaeozoology; fish bones; biodiversity; fish size; aDNA; eDNA; conservation	MIDDLE VOLGA; NORTHWEST COAST; PHYLOGEOGRAPHY; BASIN; POPULATIONS; CYPRINIDAE; FLOODPLAIN; FISHERIES; RUTILUS; SIBERIA	English	Article	Web of Science
Archaeozoology Supports a Holistic View on Fish Assessments in Large Rivers—A Case Study from the Volga River: From Quantitative Data and Ancient DNA to Biodiversity Analysis	2024	10.3390/w16081109	Knowledge of the historical and present dynamics of populations of migratory fish can promote our understanding of factors affecting their recruitment and abundance. Taxonomic identification of 23,802 bone remains and 13,539 scales of fish from 30 archaeological sites along Volga River revealed that they belonged to 41 different fish species. These data allow for retrospective comparisons and hig…	Adna; Archaeozoology; Biodiversity; Conservation; Edna; Fish Bones; Fish Size; Conservation; Fish; Fisheries; Rivers; Adna; Archaeozoology; Case-studies; Edna; Fish Bones; Fish Sizes; Holistic View; Large Rivers; Population Numbers; Salmonids; Biodiversity; Archaeology; Biodiversity; Body Size; Bone; Climate Change; Conservation Planning; Dna; Fish; Recruitment (population Dynamics); Russian Fede…	Conservation; Fish; Fisheries; Rivers; ADNA; Archaeozoology; Case-studies; EDNA; Fish bones; Fish sizes; Holistic view; Large rivers; Population numbers; Salmonids; Biodiversity; archaeology; biodiversity; body size; bone; climate change; conservation planning; DNA; fish; recruitment (population dynamics); Russian Federation; Volga River	English	Article	Scopus
Arixanthomycins A-C: Phylogeny-guided discovery of biologically active eDNA-derived pentangular polyphenols	2014	10.1021/cb500141b	Soil microbiomes are a rich source of uncharacterized natural product biosynthetic gene clusters. Here we use short conserved biosynthetic gene sequences (natural product sequence tags) amplified from soil microbiomes as phylogenetic markers to correlate genotype to chemotype and target the discovery of novel bioactive pentangular polyphenols from the environment. The heterologous expression of a…	Dna; Polyketide Synthase; Polyphenol; Antineoplastic Agents; Arixanthomycin A; Arixanthomycin B; Arixanthomycin C; Dna; Polyketides; Polyphenols; Antibiotic Agent; Antifungal Agent; Antineoplastic Agent; Arixanthomycin A; Arixanthomycin B; Arixanthomycin C; Dna; Polyketide Synthase; Polyphenol Derivative; Unclassified Drug; Xanthone Derivative; Arixanthomycin A; Arixanthomycin B; Arixanthomycin C…	antibiotic agent; antifungal agent; antineoplastic agent; arixanthomycin a; arixanthomycin b; arixanthomycin c; DNA; polyketide synthase; polyphenol derivative; unclassified drug; xanthone derivative; arixanthomycin A; arixanthomycin B; arixanthomycin C; polyketide; polyphenol; antibacterial activity; antifungal activity; antiproliferative activity; article; cancer cell line; controlled study; dr…	English	Article	Scopus
Arixanthomycins A-C: Phylogeny-Guided Discovery of Biologically Active eDNA-Derived Pentangular Polyphenols	2014	10.1021/cb500141b	Soil microbiomes are a rich source of uncharacterized natural product biosynthetic gene clusters. Here we use short conserved biosynthetic gene sequences (natural product sequence tags) amplified from soil microbiomes as phylogenetic markers to correlate genotype to chemotype and target the discovery of novel bioactive pentangular polyphenols from the environment. The heterologous expression of a…		BIOSYNTHETIC GENE-CLUSTER; II POLYKETIDE SYNTHASES; NATURAL-PRODUCTS; DNA; CLONING; IDENTIFICATION; CERVINOMYCIN; ANTIBIOTICS; BENASTATIN	English	Article	Web of Science
Arixanthomycins A-C: Phylogeny-guided discovery of biologically active eDNA-derived pentangular polyphenols	2014	10.1021/cb500141b						PubMed
Assembling and auditing a comprehensive DNA barcode reference library for European marine fishes	2016	10.1111/jfb.13169	A large-scale comprehensive reference library of DNA barcodes for European marine fishes was assembled, allowing the evaluation of taxonomic uncertainties and species genetic diversity that were otherwise hidden in geographically restricted studies. A total of 4118 DNA barcodes were assigned to 358 species generating 366 Barcode Index Numbers (BIN). Initial examination revealed as much as 141 BIN…	annotation protocol; Barcode Index Number; COI; hidden diversity; reference library; taxonomic reliability grade	ENVIRONMENTAL DNA; ALOSA-ALOSA; IDENTIFICATION; SEAFOOD; NORTH; ATLANTIC; IMPROVEMENTS; DIVERSITY; SHARKS; SYSTEM	English	Article	Web of Science
Assessing and mitigating privacy risks of sparse, noisy genotypes by local alignment to haplotype databases	2023	10.1101/gr.278322.123	Single nucleotide polymorphisms (SNPs) from omics data create a reidentification risk for individuals and their relatives. Although the ability of thousands of SNPs (especially rare ones) to identify individuals has been repeatedly shown, the availability of small sets of noisy genotypes, from environmental DNA samples or functional genomics data, motivated us to quantify their informativeness. W…	Algorithm; Genetic Database; Genetic Privacy; Genotype; Haplotype; Human; Markov Chain; Population Genetics; Procedures; Sequence Alignment; Single Nucleotide Polymorphism; Software; Algorithms; Databases, Genetic; Genetic Privacy; Genetics, Population; Genotype; Haplotypes; Humans; Markov Chains; Polymorphism, Single Nucleotide; Sequence Alignment; Software	algorithm; genetic database; genetic privacy; genotype; haplotype; human; Markov chain; population genetics; procedures; sequence alignment; single nucleotide polymorphism; software; Algorithms; Databases, Genetic; Genetic Privacy; Genetics, Population; Genotype; Haplotypes; Humans; Markov Chains; Polymorphism, Single Nucleotide; Sequence Alignment; Software	English	Article	Scopus
Assessing and mitigating privacy risks of sparse, noisy genotypes by local alignment to haplotype databases	2023	10.1101/gr.278322.123	Single nucleotide polymorphisms (SNPs) from omics data create a reidentification risk for individuals and their relatives. Although the ability of thousands of SNPs (especially rare ones) to identify individuals has been repeatedly shown, the availability of small sets of noisy genotypes, from environmental DNA samples or functional genomics data, motivated us to quantify their informativeness. W…		INFORMATION LEAKAGE; IMPUTATION; INFERENCE; ANCESTRY	English	Article	Web of Science
Assessing and mitigating privacy risks of sparse, noisy genotypes by local alignment to haplotype databases	2023	10.1101/gr.278322.123						PubMed
Assessing Applicability of eDNA-Based Sampling for Population Monitoring of Leatherback Turtles in the Northeast Indian Ocean	2025	10.1002/edn3.70160	Current population genetics studies of sea turtles primarily rely on invasive tissue sampling or blood draws, which involve the capture and handling of the animals that require specific permits and resources. Moreover, this approach is limited by the sporadic visibility of turtles. In this study, we assessed the applicability of eDNA-based sampling to obtain mitochondrial haplotype data for leath…	Edna; Leatherback Turtles; Noninvasive Sampling; Population Genetics; Population Monitoring		English	Article	Scopus
Assessing Applicability of eDNA-Based Sampling for Population Monitoring of Leatherback Turtles in the Northeast Indian Ocean	2025	10.1002/edn3.70160	Current population genetics studies of sea turtles primarily rely on invasive tissue sampling or blood draws, which involve the capture and handling of the animals that require specific permits and resources. Moreover, this approach is limited by the sporadic visibility of turtles. In this study, we assessed the applicability of eDNA-based sampling to obtain mitochondrial haplotype data for leath…	eDNA; leatherback turtles; noninvasive sampling; population genetics; population monitoring	DERMOCHELYS-CORIACEA; ENVIRONMENTAL DNA; PHYLOGEOGRAPHY; OPPORTUNITIES; MOVEMENT; PATTERNS; IMPACTS	English	Article	Web of Science
Assessing the utility of whole genome amplified DNA for next-generation molecular ecology	2015	10.1111/1755-0998.12376	DNA quantity can be a hindrance in ecological and evolutionary research programmes due to a range of factors including endangered status of target organisms, available tissue type, and the impact of field conditions on preservation methods. A potential solution to low-quantity DNA lies in whole genome amplification (WGA) techniques that can substantially increase DNA yield. To date, few studies h…	Biotechnology; Environmental Dna; Genetics; Genomics; Landscape; Phylogeography; Proteomics; Lemur; Microcebus Murinus; Animal; Cheirogaleidae; Genetics; Genomics; High Throughput Sequencing; Nucleic Acid Amplification; Procedures; Single Nucleotide Polymorphism; Animals; Genomics; High-throughput Nucleotide Sequencing; Nucleic Acid Amplification Techniques; Polymorphism, Single Nucleotide	Lemur; Microcebus murinus; animal; Cheirogaleidae; genetics; genomics; high throughput sequencing; nucleic acid amplification; procedures; single nucleotide polymorphism; Animals; Genomics; High-Throughput Nucleotide Sequencing; Nucleic Acid Amplification Techniques; Polymorphism, Single Nucleotide	English	Article	Scopus
Assessing the utility of whole genome amplified DNA for next-generation molecular ecology	2015	10.1111/1755-0998.12376	DNA quantity can be a hindrance in ecological and evolutionary research programmes due to a range of factors including endangered status of target organisms, available tissue type, and the impact of field conditions on preservation methods. A potential solution to low-quantity DNA lies in whole genome amplification (WGA) techniques that can substantially increase DNA yield. To date, few studies h…	biotechnology; environmental DNA; genetics; genomics; landscape; phylogeography; proteomics	MULTIPLE DISPLACEMENT AMPLIFICATION; WESTSLOPE CUTTHROAT TROUT; ANCIENT DNA; ENVIRONMENTAL DNA; GENOTYPING PERFORMANCE; HIGH-THROUGHPUT; GENE FLOW; SINGLE; SAMPLES; INTROGRESSION	English	Article	Web of Science
Assessing the utility of whole genome amplified DNA for next-generation molecular ecology	2015	10.1111/1755-0998.12376						PubMed
Assessment of biodiversity, global distribution, and putative ecological niches of suessiacean dinoflagellates by DNA metabarcoding	2022	10.3389/fevo.2022.1010854	Dinoflagellates in the family Suessiaceae, so-called suessiacean dinoflagellates, play diverse roles in aquatic ecosystems, being distributed from tropical to polar waters and from marine to freshwater habitats and encompassing free-living forms, symbionts, and parasites. Despite their importance due to the variety of ecological roles and biodiversity, very few studies have characterized small su…	18S rRNA; amplicon sequencing; bloom; dinoflagellate; metagenomics; metaPR(2); Suessiaceae; metabarcoding	SP-NOV DINOPHYCEAE; BIECHELERIOPSIS-ADRIATICA SUESSIACEAE; YIHIELLA-YEOSUENSIS; COASTAL WATERS; WOLOSZYNSKIA-CINCTA; GENETIC DIVERSITY; FEEDING MECHANISM; GEN. NOV.; MARINE; MIXOTROPHY	English	Article	Web of Science
Assessment of fish biodiversity in four Korean rivers using environmental DNA metabarcoding	2020	10.7717/peerj.9508	Environmental DNA (eDNA) metabarcoding is a cost-effective novel approach to estimate biodiversity in an ecosystem. In this study, the MiFish pipeline was employed to test if the system methodology is sufficiently reliable to estimate fish biodiversity in Korean rivers. A total of 125 unique haplotypes and 73 species were identified at the species level from 16 water samples collected from a sing…	Biodiversity; Edna Metabarcoding; Korea; Mifish Pipeline; Next-generation Sequencing; Environmental Dna; Rna 12s; Article; Biodiversity; Bioinformatics; Carassius Cuvieri; Carp; Cobitidae; Cyprinidae; Cyprinus Megalophthalmus; Dna Barcoding; Dna Extraction; Dna Metabarcoding; Dna Sequence; Fish; Haplotype; Hierarchical Clustering; High Throughput Sequencing; Korea; Largemouth Bass; Lepomis Macroc…	environmental DNA; RNA 12S; Article; biodiversity; bioinformatics; Carassius cuvieri; carp; Cobitidae; Cyprinidae; Cyprinus megalophthalmus; DNA barcoding; DNA extraction; DNA metabarcoding; DNA sequence; fish; haplotype; hierarchical clustering; high throughput sequencing; Korea; largemouth bass; Lepomis macrochirus; nonhuman; phylogeny; physical chemistry; polymerase chain reaction; river; shan…	English	Article	Scopus
Assessment of fish biodiversity in four Korean rivers using environmental DNA metabarcoding	2020	10.7717/peerj.9508	Environmental DNA (eDNA) metabarcoding is a cost-effective novel approach to estimate biodiversity in an ecosystem. In this study, the MiFish pipeline was employed to test if the system methodology is sufficiently reliable to estimate fish biodiversity in Korean rivers. A total of 125 unique haplotypes and 73 species were identified at the species level from 16 water samples collected from a sing…	Biodiversity; Korea; Next-generation sequencing; MiFish pipeline; eDNA metabarcoding	EDNA; LENGTH; FAUNA; LAKE	English	Article	Web of Science
Assessment of fish biodiversity in four Korean rivers using environmental DNA metabarcoding	2020	10.7717/peerj.9508						PubMed
Assessment of fungal diversity in deep-sea sediments by multiple primer approach	2012	10.1007/s11274-011-0859-3	Increasing evidence of the fungal diversity in deep-sea sediments has come from amplification of environmental DNA with fungal specific or eukaryote primer sets. In order to assess the fungal diversity in deep-sea sediments of the Central Indian Basin (CIB) at similar to 5,000 m depth, we amplified sediment DNA with four different primer sets. These were fungal-specific primer pair ITS1F/ITS4 (in…	Uncultured fungi; 18S rRNA gene; ITS primers; Deep-sea sediments; Central Indian Basin	CULTURABLE FUNGI; PHYLOGENETIC DIVERSITY; MICROBIAL DIVERSITY; BACTERIAL DIVERSITY; GENETIC DIVERSITY; MARINE-SEDIMENTS; EUKARYOTES; RDNA; BIODIVERSITY; COMMUNITIES	English	Article	Web of Science
Assessment of genetic diversity among wheat selected genotypes and local varieties for salt tolerance by using RAPD and ISSR analysis	2018	10.24996/IJS.2018.59.1B.5	Three genotypes of wheat developede for saltetoleranceethroughe plant breeding program and two local cultivars were screened for genetic variation under salinity conditions through RAPD and ISSR markers. Eight selected primers (OP1-06, OPE-16, OPN-07, OPO-17, OPD-20, OPL-05, OPI-01 and OPJ-13) were used in randomeamplifiede polymorphic eDNA (RAPD-PCR reaction) and three selected primers (UBC 809,…	Pcr; Rapd And Issr Analysis; Wheat Genotypes		English	Article	Scopus
Assigning the unassigned: A signature-based classification of rDNA metabarcodes reveals new deep-sea diversity	2024	10.1371/journal.pone.0298440	Environmental DNA metabarcoding reveals a vast genetic diversity of marine eukaryotes. Yet, most of the metabarcoding data remain unassigned due to the paucity of reference databases. This is particularly true for the deep-sea meiofauna and eukaryotic microbiota, whose hidden diversity is largely unexplored. Here, we tackle this issue by using unique DNA signatures to classify unknown metabarcode…	Water; Dna, Environmental; Dna, Ribosomal; Water; Dneasy; Powermax; Ribosome Dna; Environmental Dna; Water; Article; Biogeography; Bioinformatics; Controlled Study; Deep Sea; Deep-sea Diversity; Dna Extraction; Environmental Monitoring; Eukaryote; Foraminifer; Gene Expression; Genetic Variability; Marine Environment; Metabarcodes; Microflora; Molecular Typing; Nonhuman; Phylogenetic Tree; Phyloge…	ribosome DNA; environmental DNA; water; Article; biogeography; bioinformatics; controlled study; deep sea; deep-sea diversity; DNA extraction; environmental monitoring; eukaryote; foraminifer; gene expression; genetic variability; marine environment; metabarcodes; microflora; molecular typing; nonhuman; phylogenetic tree; phylogeny; polymerase chain reaction; Sanger sequencing; sediment; factual …	English	Article	Scopus
Assigning the unassigned: A signature-based classification of rDNA metabarcodes reveals new deep-sea diversity	2024	10.1371/journal.pone.0298440	Environmental DNA metabarcoding reveals a vast genetic diversity of marine eukaryotes. Yet, most of the metabarcoding data remain unassigned due to the paucity of reference databases. This is particularly true for the deep-sea meiofauna and eukaryotic microbiota, whose hidden diversity is largely unexplored. Here, we tackle this issue by using unique DNA signatures to classify unknown metabarcode…		PLANKTONIC-FORAMINIFERA; BENTHIC FORAMINIFERA; RIBOSOMAL DNA; PHYLOGENY; EVOLUTION; INSIGHTS; LIVE	English	Article	Web of Science
Assigning the unassigned: A signature-based classification of rDNA metabarcodes reveals new deep-sea diversity	2024	10.1371/journal.pone.0298440						PubMed
Barcoded primers used in multiplex amplicon pyrosequencing bias amplification	2011	10.1128/AEM.05220-11	"Barcode-tagged" PCR primers used for multiplex amplicon sequencing generate a thus-far-overlooked amplification bias that produces variable terminal restriction fragment length polymorphism (T-RFLP) and pyrosequencing data from the same environmental DNA template. We propose a simple two-step PCR approach that increases reproducibility and consistently recovers higher genetic diversity in pyrose…	Dna Primers; Amplicons; Dna-template; Genetic Diversity; Pcr Approach; Pcr Primers; Pyrosequencing; Reproducibilities; Terminal Restriction Fragment Length Polymorphisms; Gene Encoding; Polymerase Chain Reaction; Multiplexing; Primer Dna; Data Set; Genetic Analysis; Genetic Differentiation; Polymerase Chain Reaction; Polymorphism; Article; Diagnostic Error; Dna Sequence; Evaluation; Genetics; Met…	Amplicons; DNA-template; Genetic diversity; PCR approach; PCR primers; Pyrosequencing; Reproducibilities; Terminal restriction fragment length polymorphisms; Gene encoding; Polymerase chain reaction; Multiplexing; primer DNA; data set; genetic analysis; genetic differentiation; polymerase chain reaction; polymorphism; article; diagnostic error; DNA sequence; evaluation; genetics; methodology; rep…	English	Article	Scopus
Barcoded Primers Used in Multiplex Amplicon Pyrosequencing Bias Amplification	2011	10.1128/AEM.05220-11	Barcode-tagged PCR primers used for multiplex amplicon sequencing generate a thus-far-overlooked amplification bias that produces variable terminal restriction fragment length polymorphism (T-RFLP) and pyrosequencing data from the same environmental DNA template. We propose a simple two-step PCR approach that increases reproducibility and consistently recovers higher genetic diversity in pyrosequ…		RARE BIOSPHERE; PCR; DIVERSITY; WRINKLES	English	Article	Web of Science
Barcoded primers used in multiplex amplicon pyrosequencing bias amplification	2011	10.1128/AEM.05220-11						PubMed
Barcoding coffee grounds-Exploring pteropod gastropod biodiversity with dregs in collection jars	2023	10.3989/scimar.05275.061	Despite their cosmopolitan occurrence and massive plankton sampling during expeditions, the genetic diversity within Pteropoda Cuvier, 1804 is still largely unexplored. In this study we present a next-generation environmental barcoding approach to zooplankton bulk samples, which were collected during the circumglobal 2010 Malaspina expedition to evaluate pteropod diversity. We introduce a techniq…	Mollusca; Gastropoda; plankton; environmental DNA; circumglobally; pteropod diversity; Malaspina expedition	MOLLUSCA; BIOSTRATIGRAPHY; EUTHECOSOMATA; SYSTEMATICS; HETEROPODS; MORPHOLOGY	English	Article	Web of Science
Barcoding coffee grounds—Exploring pteropod gastropod biodiversity with dregs in collection jars; Barcoding a partir de posos de café - Explorando la biodiversidad de gasterópodos pterópodos a partir de posos de frascos de colección	2023	10.3989/scimar.05275.061	Despite their cosmopolitan occurrence and massive plankton sampling during expeditions, the genetic diversity within Pteropoda Cuvier, 1804 is still largely unexplored. In this study we present a next-generation environmental barcoding approach to zooplankton bulk samples, which were collected during the circumglobal 2010 Malaspina expedition to evaluate pteropod diversity. We introduce a techniq…	Circumglobally; Environmental Dna; Gastropoda; Malaspina Expedition; Mollusca; Plankton; Pteropod Diversity		English	Article	Scopus
Barcoding coffee grounds—Exploring pteropod gastropod biodiversity with dregs in collection jars; Barcoding a partir de posos de café-Explorando la biodiversidad de gasterópodos pterópodos a partir de posos de frascos de colección	2023	10.3989/scimar.05275.061	Despite their cosmopolitan occurrence and massive plankton sampling during expeditions, the genetic diversity within Pteropoda Cuvier, 1804 is still largely unexplored. In this study we present a next-generation environmental bar-coding approach to zooplankton bulk samples, which were collected during the circumglobal 2010 Malaspina expedition to evaluate pteropod diversity. We introduce a techni…	Circumglobally; Environmental Dna; Gastropoda; Malaspina Expedition; Mollusca; Plankton; Pteropod Diversity; Biodiversity; Coffee; Dna; Gastropod; Geographical Distribution; Introduced Species; Taxonomy; Zooplankton; Indian Ocean; Indian Ocean (south)	biodiversity; coffee; DNA; gastropod; geographical distribution; introduced species; taxonomy; zooplankton; Indian Ocean; Indian Ocean (South)	English	Article	Scopus
Benefits of genetic data for spatial conservation planning in coastal habitats	2023	10.1017/cft.2023.16	Coastal marine environments are subject to a variety of anthropogenic pressures that can negatively impact habitats and the biodiversity they harbor. Conservation actions such as marine protected areas, marine reserves, and other effective area-based conservation measures, are pivotal tools for protecting coastal biodiversity. However, to be effective, conservation area networks must be planned t…	Connectivity; Edna; Marine Protected Areas; Spatial Conservation Prioritization; Systematic Conservation Planning		English	Review	Scopus
Benefits of genetic data for spatial conservation planning in coastal habitats	2023	10.1017/cft.2023.16	Coastal marine environments are subject to a variety of anthropogenic pressures that can negatively impact habitats and the biodiversity they harbor. Conservation actions such as marine protected areas, marine reserves, and other effective area-based conservation measures, are pivotal tools for protecting coastal biodiversity. However, to be effective, conservation area networks must be planned t…	Systematic conservation planning; spatial conservation prioritization; marine protected areas; connectivity; eDNA	PHYLOGENETIC DIVERSITY; PROTECTED AREAS; CONNECTIVITY; BIODIVERSITY; DISPERSAL; SELECTION; FISH; EVOLUTIONARY; POPULATIONS; PATTERNS	English	Review	Web of Science
Benthic invertebrate biodiversity enhancement with reef cubes® , evidenced by environmental DNA analysis of sediment samples	2023	10.1016/j.ecoleng.2023.107064	Nature inclusive design (NID) is an eco-friendly approach to the construction of manmade infrastructure. reef cubes (R) are patented construction products designed to be used as NID options for marine developments. Artificial reefs can be made with reef cubes (R) when used either as replacements of or additions to conventional marine manmade structures in marine construction projects. The first l…	Nature Inclusive Design; Environmental DNA; Functional feeding groups; Artificial reef; Reef cubes & REG;; Hybrid nature-based solutions	MAN-MADE STRUCTURES; ARTIFICIAL REEFS; OCEAN SPRAWL; RAREFACTION; ASSEMBLAGES; HABITATS; TRENDS	English	Article	Web of Science
Benthic invertebrate biodiversity enhancement with reef cubes®, evidenced by environmental DNA analysis of sediment samples	2023	10.1016/j.ecoleng.2023.107064	Nature inclusive design (NID) is an “eco-friendly” approach to the construction of manmade infrastructure. reef cubes® are patented construction products designed to be used as NID options for marine developments. Artificial reefs can be made with reef cubes® when used either as replacements of or additions to conventional marine manmade structures in marine construction projects. The first long-…	Artificial Reef; Environmental Dna; Functional Feeding Groups; Hybrid Nature-based Solutions; Nature Inclusive Design; Reef Cubes®; Biodiversity; Feeding; Geometry; Reefs; Sedimentology; Sediments; Artificial Reefs; Dna Analysis; Environmental Dna; Functional Feeding Groups; Hybrid Nature-based Solution; Inclusive Design; Nature Inclusive Design; Reef Cube®; Sediment Samples; Test Site; Dna; Arti…	Biodiversity; Feeding; Geometry; Reefs; Sedimentology; Sediments; Artificial reefs; DNA analysis; Environmental DNA; Functional feeding groups; Hybrid nature-based solution; Inclusive design; Nature inclusive design; Reef cube®; Sediment samples; Test site; DNA; artificial reef; biodiversity; epifauna; functional group; invertebrate; metazoan; species richness; England; Torbay; United Kingdom	English	Article	Scopus
Beyond biodiversity: Can environmental DNA (eDNA) cut it as a population genetics tool?	2019	10.3390/genes10030192	Population genetic data underpin many studies of behavioral, ecological, and evolutionary processes in wild populations and contribute to effective conservation management. However, collecting genetic samples can be challenging when working with endangered, invasive, or cryptic species. Environmental DNA (eDNA) offers a way to sample genetic material non-invasively without requiring visual observ…	Biodiversity; Conservation; Edna; Genetics; Mitochondrial Dna; Mtdna; Populations; Sampling Methodology; Dna; Dna; Environmental Dna; Mitochondrial Dna; Unclassified Drug; Article; Biodiversity; Copy Number Variation; Genetic Variation; Haplotype; Low Copy Number; Nonhuman; Phylogeny; Polymerase Chain Reaction; Population Abundance; Population Genetics; Population Size; Population Structure; Sing…	DNA; environmental DNA; mitochondrial DNA; unclassified drug; Article; biodiversity; copy number variation; genetic variation; haplotype; low copy number; nonhuman; phylogeny; polymerase chain reaction; population abundance; population genetics; population size; population structure; single nucleotide polymorphism; whole genome sequencing	English	Review	Scopus
Beyond Biodiversity: Can Environmental DNA (eDNA) Cut It as a Population Genetics Tool?	2019	10.3390/genes10030192	Population genetic data underpin many studies of behavioral, ecological, and evolutionary processes in wild populations and contribute to effective conservation management. However, collecting genetic samples can be challenging when working with endangered, invasive, or cryptic species. Environmental DNA (eDNA) offers a way to sample genetic material non-invasively without requiring visual observ…	sampling methodology; mtDNA; mitochondrial DNA; conservation; biodiversity; populations; genetics; eDNA	BOTTLE-NOSED DOLPHINS; DROPLET DIGITAL PCR; GREAT CRESTED NEWT; CHAIN-REACTION PCR; REAL-TIME PCR; MITOCHONDRIAL-DNA; NATURAL-POPULATIONS; TURSIOPS-TRUNCATUS; COPY NUMBER; NUCLEAR	English	Article	Web of Science
Beyond Biodiversity: Can Environmental DNA (eDNA) Cut It as a Population Genetics Tool?	2019	10.3390/genes10030192						PubMed
Beyond Presence and Absence: Using eDNA and Microsatellite Genotyping to Estimate Densities of Microscopic Life Forms in Wild Populations	2025	10.1111/1755-0998.14116	Many challenges arise when monitoring organisms with cryptic life-histories. For example, some cryptic life-stages are hard to identify or sample due to their microscopic nature, which creates unknowns surrounding an organism's population dynamics. Environmental DNA (eDNA) is a non-invasive sampling technique used to monitor cryptic species when traditional survey methods are challenging. General…	Environmental Dna; Gametophytes; High-throughput Amplicon Sequencing; Kelp; Life-history; Microsatellites; Mixture Analyses		English	Article	Scopus
Beyond Presence and Absence: Using eDNA and Microsatellite Genotyping to Estimate Densities of Microscopic Life Forms in Wild Populations	2025	10.1111/1755-0998.14116	Many challenges arise when monitoring organisms with cryptic life-histories. For example, some cryptic life-stages are hard to identify or sample due to their microscopic nature, which creates unknowns surrounding an organism's population dynamics. Environmental DNA (eDNA) is a non-invasive sampling technique used to monitor cryptic species when traditional survey methods are challenging. General…	environmental DNA; gametophytes; high-throughput amplicon sequencing; kelp; life-history; microsatellites; mixture analyses	ENVIRONMENTAL DNA; KELP; CONTRIBUTORS; NUMBER; CONSEQUENCES; REPRODUCTION; BIODIVERSITY; MIXTURES; SOFTWARE; SOUTHERN	English	Article; Early Access	Web of Science
Beyond Presence and Absence: Using eDNA and Microsatellite Genotyping to Estimate Densities of Microscopic Life Forms in Wild Populations	2025	10.1111/1755-0998.14116						PubMed
Beyond species detection-leveraging environmental DNA and environmental RNA to push beyond presence/absence applications	2023	10.1002/edn3.459		abundance; ecology; eDNA; eDNA dynamics; eRNA; population genetics		English	Article	Web of Science
Beyond species detection—leveraging environmental DNA and environmental RNA to push beyond presence/absence applications	2023	10.1002/edn3.459	[No abstract available]	Abundance; Ecology; Edna; Edna Dynamics; Erna; Population Genetics		English	Note	Scopus
Biofilm Formation by ica-Negative Ocular Isolates of Staphylococcus haemolyticus	2018	10.3389/fmicb.2018.02687	Staphylococcus haemolyticus is the second most frequently isolated CoNS from ocular infections and human blood cultures. In this study, we examined 18 ocular S. haemolyticus isolates for their capacity to form biofilm and conducted detachment assay to determine the composition of the biofilm matrix and involvement of various elements in cell lysis. PCR identified the presence of biofilm-associate…	biofilm; Staphylococcus haemolyticus; extracellular DNA; proteins; autolysis; sortase A	HORIZONTAL GENE-TRANSFER; GENOTYPIC CHARACTERIZATION; AMINOGLYCOSIDE RESISTANCE; INTERCELLULAR-ADHESION; AUREUS BIOFILMS; EPIDERMIDIS; INFECTIONS; STRAINS; PROTEIN; SURFACE	English	Article	Web of Science
Bioinformatic pipelines combining denoising and clustering tools allow for more comprehensive prokaryotic and eukaryotic metabarcoding	2021	10.1111/1755-0998.13398	Environmental DNA metabarcoding is a powerful tool for studying biodiversity. However, bioinformatic approaches need to adjust to the diversity of taxonomic compartments targeted as well as to each barcode gene specificities. We built and tested a pipeline based on read correction with DADA2 allowing analysing metabarcoding data from prokaryotic (16S) and eukaryotic (18S, COI) life compartments. …	DADA2; deep‐ sea biodiversity; LULU; mock communities; multimarker metabarcoding; swarm	RIBOSOMAL-RNA SEQUENCES; DEEP-SEA; MITOCHONDRIAL PSEUDOGENES; BIODIVERSITY ASSESSMENT; EXTRACTION METHODS; COMMUNITY ANALYSIS; GENETIC DIVERSITY; DNA REVEALS; 16S; PATTERNS	English	Article	Web of Science
Biology and Conservation of Moxostoma spp. Occurring in Canada with Emphasis on the Copper Redhorse (M. hubbsi, Legendre 1952), an Endemic Species on an Extinction Trajectory	2025	10.3390/conservation5020027	Freshwater fishes are one of the most threatened animal taxa in North America. In Canada, roughly 30% of the occurring species are currently listed and under protection, including redhorses. This review covers Moxostoma spp. ecology, biology, conservation efforts, and highlights challenges to galvanize actions and outcomes through research. The threats to their survival are strongly associated to…	Biodiversity; Catostomidae; Conservation Aquaculture; Conservation Physiology; Freshwater Fishes; Moxostoma; Moxostoma Hubbsi		English	Review	Scopus
Biology and Conservation of Moxostoma spp. Occurring in Canada with Emphasis on the Copper Redhorse (M. hubbsi, Legendre 1952), an Endemic Species on an Extinction Trajectory	2025	10.3390/conservation5020027	Freshwater fishes are one of the most threatened animal taxa in North America. In Canada, roughly 30% of the occurring species are currently listed and under protection, including redhorses. This review covers Moxostoma spp. ecology, biology, conservation efforts, and highlights challenges to galvanize actions and outcomes through research. The threats to their survival are strongly associated to…	biodiversity; Catostomidae; Moxostoma; conservation physiology; conservation aquaculture; freshwater fishes; Moxostoma hubbsi	AMERICAN FRESH-WATER; ST-LAWRENCE-RIVER; SUBMERGED AQUATIC VEGETATION; GOBY NEOGOBIUS-MELANOSTOMUS; SHORTHEAD REDHORSE; GREATER REDHORSE; BLACK REDHORSE; GRAND RIVER; HABITAT USE; PHYLOGENETIC-RELATIONSHIPS	English	Review	Web of Science
Biomonitoring 2.0 Refined: observing local change through metaphylogeography using a community-based eDNA metabarcoding monitoring network	2025	10.1186/s12915-025-02284-x	Background: Biological data at different levels of organization is essential to support actions to mitigate the current biodiversity crisis. DNA metabarcoding is an established method to detect species/genus level taxa from bulk samples leading the way for a Biomonitoring 2.0 framework. Biomonitoring 2.0 Refined adds another dimension to Biomonitoring 2.0—high-throughput, scalable DNA metabarcodi…	Citizen Science; Conservation; Haplotypes; Phylogeography; Populations; Dna, Mitochondrial; Mitochondrial Dna; Animal; Arthropod; Biodiversity; Biological Monitoring; Classification; Dna Barcoding; Genetic Variation; Genetics; Procedures; Animals; Arthropods; Biodiversity; Biological Monitoring; Dna Barcoding, Taxonomic; Dna, Mitochondrial; Genetic Variation	mitochondrial DNA; animal; arthropod; biodiversity; biological monitoring; classification; DNA barcoding; genetic variation; genetics; procedures; Animals; Arthropods; Biodiversity; Biological Monitoring; DNA Barcoding, Taxonomic; DNA, Mitochondrial; Genetic Variation	English	Article	Scopus
Biomonitoring 2.0 Refined: observing local change through metaphylogeography using a community-based eDNA metabarcoding monitoring network	2025	10.1186/s12915-025-02284-x	BackgroundBiological data at different levels of organization is essential to support actions to mitigate the current biodiversity crisis. DNA metabarcoding is an established method to detect species/genus level taxa from bulk samples leading the way for a Biomonitoring 2.0 framework. Biomonitoring 2.0 Refined adds another dimension to Biomonitoring 2.0-high-throughput, scalable DNA metabarcoding…	Citizen science; Phylogeography; Populations; Haplotypes; Conservation	ENVIRONMENTAL DNA; GENETIC-STRUCTURE; AQUATIC INSECTS; DISPERSAL; STREAM; PHYLOGEOGRAPHY; POPULATIONS; SCALE; INVERTEBRATES; TRICHOPTERA	English	Article	Web of Science
Biomonitoring 2.0 Refined: observing local change through metaphylogeography using a community-based eDNA metabarcoding monitoring network	2025	10.1186/s12915-025-02284-x						PubMed
Blood, sweat and tears: a review of non-invasive DNA sampling	2022	10.24072/pcjournal.98	The use of DNA data is ubiquitous across animal sciences. DNA may be obtained from an organism for a myriad of reasons including identification and distinction between cryptic species, sex identification, comparisons of different morphocryptic genotypes or assessments of relatedness between organisms prior to a behavioural study. DNA should be obtained while minimizing the impact on the fitness, …		SEASONAL ACTIVITY PATTERNS; GENETIC MARK-RECAPTURE; ENVIRONMENTAL DNA; POPULATION-SIZE; BEHAVIORAL-RESPONSE; INVASIVE TECHNIQUE; CAPTURE STRESS; BIOPSY SYSTEM; BROWN BEARS; SEX-RATIO	English	Review	Web of Science
Blood, sweat and tears: a review of non-invasive DNA sampling	2022	10.24072/pcjournal.98	The use of DNA data is ubiquitous across animal sciences. DNA may be obtained from an organism for a myriad of reasons including identification and distinction between cryptic species, sex identification, comparisons of different morphocryptic genotypes or assessments of relatedness between organisms prior to a behavioural study. DNA should be obtained while minimizing the impact on the fitness, …		SEASONAL ACTIVITY PATTERNS; GENETIC MARK-RECAPTURE; ENVIRONMENTAL DNA; POPULATION-SIZE; BEHAVIORAL-RESPONSE; INVASIVE TECHNIQUE; CAPTURE STRESS; BIOPSY SYSTEM; BROWN BEARS; SEX-RATIO	English	Review	Web of Science
Bone Adhered Sediments as a Source of Target and Environmental DNA and Proteins	2025	10.1093/molbev/msaf202	In recent years, sediments from cave environments have provided invaluable insights into ancient hominids, as well as past fauna and flora. Unfortunately, however, sediments are not always collected during excavation. In this study, we analyzed an overlooked but abundant resource in archaeological collections - sediments adhered to bone. We performed metagenomics and metaproteomics analysis on se…	Ancient Dna; Metagenomics; Paleoproteomics; Population Genetics; Dna; Protein; Dna, Ancient; Nextseq500; Ancient Dna; Bacterial Protein; Dna; Dux010b Protein; Dux012b Protein; Element; Environmental Dna; Fetuin A; Mitochondrial Dna; Protein; Proteome; Unclassified Drug; Animal Experiment; Animal Tissue; Archeology; Article; Bacterium Identification; Body Remains; Bone; Bone Adhered Sediment; Cont…	ancient DNA; bacterial protein; DNA; dux010b protein; dux012b protein; element; environmental DNA; fetuin A; mitochondrial DNA; protein; proteome; unclassified drug; animal experiment; animal tissue; archeology; Article; bacterium identification; body remains; bone; bone adhered sediment; controlled study; DNA sequence; England; fauna; flora; genetic analysis; genetic profile; genome analysis; gu…	English	Article	Scopus
Bone Adhered Sediments as a Source of Target and Environmental DNA and Proteins	2025	10.1093/molbev/msaf202	In recent years, sediments from cave environments have provided invaluable insights into ancient hominids, as well as past fauna and flora. Unfortunately, however, sediments are not always collected during excavation. In this study, we analyzed an overlooked but abundant resource in archaeological collections - sediments adhered to bone. We performed metagenomics and metaproteomics analysis on se…	ancient DNA; metagenomics; paleoproteomics; population genetics	ANCIENT DNA; QUALITY-CONTROL; DENISOVAN DNA; R-PACKAGE; IDENTIFICATION; NEANDERTHAL; ALIGNMENT; SEQUENCE; GENOMICS; PEPTIDE	English	Article	Web of Science
Bone Adhered Sediments as a Source of Target and Environmental DNA and Proteins	2025	10.1093/molbev/msaf202						PubMed
Building a Teleost Fish Traceability Program Based on Genetic Data from Pacific Panama Fish Markets	2023	10.3390/ani13142272	Fish tissue samples from 203 adult individuals were collected in the main ports and markets of the Pacific coast of Panama. Molecular identification based on a cytochrome oxidase I gene segment of all species was verified by GENBANK reference sequences. A total of 34 species from 14 families (Ariidae, Caranjidae, Centropomidae, Gerreidae, Haemulidae, Lobotidae, Lutjanidae, Malacanthidae, Mugilida…	Coi; Demographic History; Environmental Dna; Haplotypic Diversity; Nucleotide Diversity; Qpcr; Teleostei; Cytochrome C Oxidase; Dneasy; Nanodrop; Cytochrome C Oxidase; Article; Demography; Dna Extraction; Estuarine Species; Fish; Fish Market; Fishery; Genetic Distance; Genetic Variability; Haplotype; Migratory Species; Nonhuman; Panama; Polymerase Chain Reaction; Sequence Analysis; Species Divers…	cytochrome c oxidase; Article; demography; DNA extraction; estuarine species; fish; fish market; fishery; genetic distance; genetic variability; haplotype; migratory species; nonhuman; Panama; polymerase chain reaction; sequence analysis; species diversity; species identification; teleost	English	Article	Scopus
Building a Teleost Fish Traceability Program Based on Genetic Data from Pacific Panama Fish Markets	2023	10.3390/ani13142272	Simple Summary Molecular identification of fish tissue samples from 203 individuals was conducted based on cytochrome oxidase I gene segment sequencing. A total of 34 species from 14 families (Ariidae, Caranjidae, Centropomidae, Gerreidae, Haemulidae, Lobotidae, Lutjanidae, Malacanthidae, Mugilidae, Serranidae, Scianidae, Scombridae, Sphyraenidae, Stromateidae) were identified at the species leve…	COI; teleostei; nucleotide diversity; haplotypic diversity; qPCR; demographic history; environmental DNA	SNAPPER LUTJANUS-PERU; RED SNAPPER; FRESH-WATER; FOOD TRACEABILITY; DNA BARCODES; DIVERSITY; MARINE; IDENTIFICATION; TOOLS; GULF	English	Article	Web of Science
Building a Teleost Fish Traceability Program Based on Genetic Data from Pacific Panama Fish Markets	2023	10.3390/ani13142272						PubMed
Can haplotypes be recovered from environmental DNA?	2019					English	Meeting Abstract	Web of Science
Capturing environmental DNA in snow tracks of polar bear, Eurasian lynx and snow leopard towards individual identification	2023	10.3389/fcosc.2023.1250996	Polar bears (Ursus maritimus), Eurasian lynx (Lynx lynx) and snow leopards (Panthera uncia) are elusive large carnivores inhabiting snow-covered and remote areas. Their effective conservation and management are challenged by inadequate population information, necessitating development of novel data collection methods. Environmental DNA (eDNA) from snow tracks (footprints in snow) has identified s…	Eurasian Lynx (lynx Lynx); Individual; Nuclear Edna; Polar Bear (ursus Maritimus); Sampling Protocol; Snow; Snow Leopard (panthera Uncia); Snow Track		English	Article	Scopus
Capturing environmental DNA in snow tracks of polar bear, Eurasian lynx and snow leopard towards individual identification	2023	10.3389/fcosc.2023.1250996	Polar bears (Ursus maritimus), Eurasian lynx (Lynx lynx) and snow leopards (Panthera uncia) are elusive large carnivores inhabiting snow-covered and remote areas. Their effective conservation and management are challenged by inadequate population information, necessitating development of novel data collection methods. Environmental DNA (eDNA) from snow tracks (footprints in snow) has identified s…	nuclear eDNA; snow; snow track; individual; polar bear (Ursus maritimus); Eurasian lynx (Lynx lynx); snow leopard (Panthera uncia); sampling protocol	MICROSATELLITE MARKERS; POPULATION; CONSERVATION; COLLECTION; CARNIVORES; RARE	English	Article	Web of Science
Carp edema virus surveillance in the koi trade: early detection through shipping environment sampling and longitudinal monitoring of CEV outbreaks in a wholesaler facility	2025	10.1186/s13567-025-01476-1	Carp edema virus (CEV), a member of the Poxviridae family, has been a significant pathogen in koi and common carp since its initial identification in Japan during the 1970s. CEV, the causative agent of Koi Sleepy Disease (KSD), can cause high mortality rates and has been reported in many countries and is often linked to the fish trade. The virus is typically detected through DNA analysis of gill …	Cyprinus Carpio; Poxviridae; Carp; Genotyping; Transboundary Animal Disease; Animal; Carp; Epidemic; Epidemiology; Fish Disease; Genetics; Gill; Isolation And Purification; Japan; Physiology; Poxviridae; Poxvirus Infection; Ship; Veterinary Medicine; Virology; Animals; Carps; Disease Outbreaks; Fish Diseases; Gills; Poxviridae Infections; Ships	animal; carp; epidemic; epidemiology; fish disease; genetics; gill; isolation and purification; Japan; physiology; Poxviridae; poxvirus infection; ship; veterinary medicine; virology; Animals; Carps; Disease Outbreaks; Fish Diseases; Gills; Poxviridae Infections; Ships	English	Article	Scopus
Carp edema virus surveillance in the koi trade: early detection through shipping environment sampling and longitudinal monitoring of CEV outbreaks in a wholesaler facility	2025	10.1186/s13567-025-01476-1	Carp edema virus (CEV), a member of the Poxviridae family, has been a significant pathogen in koi and common carp since its initial identification in Japan during the 1970s. CEV, the causative agent of Koi Sleepy Disease (KSD), can cause high mortality rates and has been reported in many countries and is often linked to the fish trade. The virus is typically detected through DNA analysis of gill …	Carp; Cyprinus carpio; transboundary animal disease; Poxviridae; genotyping	WILD COMMON CARP; CYPRINUS-CARPIO; SLEEPY DISEASE; 1ST REPORT; MORTALITY; HERPESVIRUS; INFECTION; EMERGENCE; COLORCARP; TISSUES	English	Article	Web of Science
Carp edema virus surveillance in the koi trade: early detection through shipping environment sampling and longitudinal monitoring of CEV outbreaks in a wholesaler facility	2025	10.1186/s13567-025-01476-1						PubMed
Cascabel: A Scalable and Versatile Amplicon Sequence Data Analysis Pipeline Delivering Reproducible and Documented Results	2020	10.3389/fgene.2020.489357	Marker gene sequencing of the rRNA operon (16S, 18S, ITS) or cytochrome c oxidase I (CO1) is a popular means to assess microbial communities of the environment, microbiomes associated with plants and animals, as well as communities of multicellular organisms via environmental DNA sequencing. Since this technique is based on sequencing a single gene, or even only parts of a single gene rather than…	16s/18s Rrna Gene; Amplicon Sequencing; Community Profiling; Illumina; Microbiome; Pipeline; Snakemake; Cytochrome C; Cytochrome C Oxidase; Transfer Rna; Cytochrome C; Cytochrome C Oxidase; Genomic Dna; Rna 16s; Rna 18s; Transfer Rna; Algorithm; Amplicon; Article; Bioinformatics; Data Analysis; Data Base; Dna Sequence; Documentation; Gene Cluster; Gene Mapping; Gene Sequence; Genotyping Technique…	cytochrome c; cytochrome c oxidase; genomic DNA; RNA 16S; RNA 18S; transfer RNA; algorithm; amplicon; Article; bioinformatics; data analysis; data base; DNA sequence; documentation; gene cluster; gene mapping; gene sequence; genotyping technique; histogram; metagenome; metagenomics; nonhuman; nucleotide sequence; particulate matter; performance; phylogenetic tree; protein fingerprinting; quality …	English	Article	Scopus
Characterization of defective nucleotide excision repair in XPC mutant mice	1997	10.1016/S0027-5107(97)00046-8	Nucleotide excision repair (NER) is a fundamental process required for maintaining the integrity of the genome in cells exposed to environmental DNA damage. Humans defective in NER suffer from the hereditary cancer-prone disease xeroderma pigmentosum. In order to model this disease in mice a mutation in the mouse XPC gene was generated and used to replace a wild-type XPC allele in mouse embryonic…	Nucleotide Excision Repair; Xeroderma Pigmentosum; Xpc Mutant Mouse; Deoxyribonucleases, Type Ii Site-specific; Dna-binding Proteins; Endodeoxyribonuclease Xhoi; Xpc Protein, Mouse; Animal Cell; Animal Model; Article; Excision Repair; Fibroblast; Mouse; Nonhuman; Northern Blotting; Priority Journal; Radiosensitivity; Rna Analysis; Transgenic Mouse; Ultraviolet Irradiation; Xeroderma Pigmentosum; …	animal cell; animal model; article; excision repair; fibroblast; mouse; nonhuman; northern blotting; priority journal; radiosensitivity; rna analysis; transgenic mouse; ultraviolet irradiation; xeroderma pigmentosum; Alleles; Animals; Blotting, Southern; Cell Line; Deoxyribonucleases, Type II Site-Specific; DNA Repair; DNA-Binding Proteins; Fibroblasts; Frameshift Mutation; Genes, p53; Mice; Mice…	English	Article	Scopus
Characterization of defective nucleotide excision repair in XPC mutant mice	1997	10.1016/S0027-5107(97)00046-8	Nucleotide excision repair (NER) is a fundamental process required for maintaining the integrity of the genome in cells exposed to environmental DNA damage. Humans defective in NER suffer from the hereditary cancer-prone disease xeroderma pigmentosum. In order to model this disease in mice a mutation in the mouse XPC gene was generated and used to replace a wild-type XPC allele in mouse embryonic…	xeroderma pigmentosum; nucleotide excision repair; XPC mutant mouse	CYCLOBUTANE PYRIMIDINE DIMERS; XERODERMA-PIGMENTOSUM; ULTRAVIOLET-B; DNA; GENE; LACKING; CELLS; SUSCEPTIBILITY; ABNORMALITIES; FIBROBLASTS	English	Article	Web of Science
Characterization of defective nucleotide excision repair in XPC mutant mice	1997	10.1016/s0027-5107(97)00046-8						PubMed
Characterization of DNA Processing Protein A (DprA) of the Radiation-Resistant Bacterium Deinococcus radiodurans	2022	10.1128/spectrum.03470-22	Environmental DNA uptake by certain bacteria and its integration into their genome create genetic diversity and new phenotypes. DNA processing protein A (DprA) is part of a multiprotein complex and facilitates the natural transformation (NT) phenotype in most bacteria. Deinococcus radiodurans, an extremely radioresistant bacterium, is efficient in NT, and its genome encodes nearly all of the comp…	Dpra; Edna; Natural Transformation Systems; Bevifimod; Dna; Bacterial Proteins; Dna; Dna, Bacterial; Dna, Single-stranded; Staphylococcal Protein A; J815; Dna Processing Protein A; Protein A; Unclassified Drug; Bacterial Dna; Bacterial Protein; Bevifimod; Dna; Single Stranded Dna; Article; Base Pairing; Binding Affinity; Biophysics; Biotransformation; Carboxy Terminal Sequence; Circular Dichroism…	dna processing protein A; protein A; unclassified drug; bacterial DNA; bacterial protein; bevifimod; DNA; single stranded DNA; Article; base pairing; binding affinity; biophysics; biotransformation; carboxy terminal sequence; circular dichroism; coimmunoprecipitation; controlled study; crystallization; Deinococcus radiodurans; DNA binding; DNA binding assay; Drosophila melanogaster; enzyme activi…	English	Article	Scopus
Characterization of DNA Processing Protein A (DprA) of the Radiation-Resistant Bacterium Deinococcus radiodurans	2022	10.1128/spectrum.03470-22	Environmental DNA uptake by certain bacteria and its integration into their genome create genetic diversity and new phenotypes. DNA processing protein A (DprA) is part of a multiprotein complex and facilitates the natural transformation (NT) phenotype in most bacteria. Deinococcus radiodurans, an extremely radioresistant bacterium, is efficient in NT, and its genome encodes nearly all of the comp…	DprA; eDNA; natural transformation systems	SINGLE-STRANDED-DNA; BACILLUS-SUBTILIS DPRA; NATURAL TRANSFORMATION; RECA PROTEIN; RADIORESISTANCE; COMPETENCE; BINDING; GENOME; SEX; PHOSPHORYLATION	English	Article	Web of Science
Characterization of DNA Processing Protein A (DprA) of the Radiation-Resistant Bacterium Deinococcus radiodurans	2022	10.1128/spectrum.03470-22						PubMed
Characterizing the distribution of the critically endangered estuarine pipefish (Syngnathus watermeyeri) across its range using environmental DNA	2023	10.1002/edn3.365	The effective management of rare and threatened species, especially in areas where population sizes have diminished, relies on knowledge of their population size, threats, and distribution. Robust mapping of distribution presents a particular challenge in aquatic environments for cryptic species, especially those with low abundance. Environmental DNA (eDNA) approaches can offer improved detection…	Barcoding; Biomonitoring; Conservation; Cryptobenthic; Endangered Species; Syngnathidae		English	Article	Scopus
Characterizing the distribution of the critically endangered estuarine pipefish (Syngnathus watermeyeri) across its range using environmental DNA	2023	10.1002/edn3.365	The effective management of rare and threatened species, especially in areas where population sizes have diminished, relies on knowledge of their population size, threats, and distribution. Robust mapping of distribution presents a particular challenge in aquatic environments for cryptic species, especially those with low abundance. Environmental DNA (eDNA) approaches can offer improved detection…	barcoding; biomonitoring; conservation; cryptobenthic; endangered species; Syngnathidae	SEAGRASS ZOSTERA-CAPENSIS; PISCES SYNGNATHIDAE; EXTINCTION RISK; KARIEGA ESTUARY; RIVER PIPEFISH; SEAHORSES; FISH; CONSERVATION; ABUNDANCE; ECOLOGY	English	Article	Web of Science
Chelation of membrane-bound cations by extracellular DNA activates the type VI secretion system in pseudomonas aeruginosa	2016	10.1128/IAI.00233-16	Pseudomonas aeruginosa employs its type VI secretion system (T6SS) as a highly effective and tightly regulated weapon to delivertoxic molecules to target cells. T6SS-secreted proteins of P. aeruginosa can be detected in the sputum of cystic fibrosis (CF)patients, who typically present a chronic and polymicrobial lung infection. However, the mechanism of T6SS activation in theCF lung is not fully …	Deoxyribonuclease; Dna; Polymyxin B; Cations; Dna; Type Vi Secretion Systems; Deoxyribonuclease; Dna; Polymyxin B; Cation; Type Vi Secretion System; Allele; Article; Bacterial Cell; Bacterial Growth; Bacterial Strain; Burkholderia Cepacia; Chelation; Controlled Study; Eukaryotic Cell; Fluorescence Microscopy; Human; Microbial Community; Outer Membrane; Prevalence; Priority Journal; Pseudomonas Ae…	deoxyribonuclease; DNA; polymyxin B; cation; type VI secretion system; allele; Article; bacterial cell; bacterial growth; bacterial strain; Burkholderia cepacia; chelation; controlled study; eukaryotic cell; fluorescence microscopy; human; microbial community; outer membrane; prevalence; priority journal; Pseudomonas aeruginosa; signal transduction; Vibrio cholerae; cell membrane; complication; c…	English	Article	Scopus
Clinical and molecular characterization of five Chinese patients with autosomal recessive osteopetrosis	2021	10.1002/mgg3.1815	Background: Osteopetrosis is characterized by increased bone density and bone marrow cavity stenosis due to a decrease in the number of osteoclasts or the dysfunction of their differentiation and absorption properties usually caused by biallelic variants of the TCIRG1 and CLCN7 genes. Methods: In this study, we describe five Chinese children who presented with anemia, thrombocytopenia, hepatosple…	autosomal recessive osteopetrosis; eDNA sequencing; CLCN7; novel variant; TCIRG1	INFANTILE MALIGNANT OSTEOPETROSIS; CLCN7 GENE-MUTATIONS; DOMINANT OSTEOPETROSIS; TCIRG1; IDENTIFICATION; VARIANTS; ASSOCIATION; FAMILIES; DISEASE; LEADS	English	Article	Web of Science
COI barcoding provides reliable species identification and pinpoints cryptic diversity in Western Palearctic amphibians	2023	10.1163/15685381-bja10148	Assembling DNA barcode reference libraries for various taxonomic groups allows researchers to use metabarcoding or environmental DNA approaches to gain a rapid understanding of diversity in given environments. However, our ability to use reference libraries depends on how accurately DNA barcodes are able to recover taxonomic boundaries and identify species, which is rarely considered. We construc…	Barcoding Gap; Dna Barcoding; Mitochondrial Dna; Reference Library; Species Delimitation; Specimen Identification.; Amphibian; Dna Fingerprinting; Identification Method; Introgression; Mitochondrial Dna; Palearctic Ecozone; Phylogenetics	amphibian; DNA fingerprinting; identification method; introgression; mitochondrial DNA; Palearctic Ecozone; phylogenetics	English	Article	Scopus
COI barcoding provides reliable species identification and pinpoints cryptic diversity in Western Palearctic amphibians	2023	10.1163/15685381-bja10148	Assembling DNA barcode reference libraries for various taxonomic groups allows researchers to use metabar-coding or environmental DNA approaches to gain a rapid understanding of diversity in given environments. However, our ability to use reference libraries depends on how accurately DNA barcodes are able to recover taxonomic boundaries and identify species, which is rarely considered. We constru…	barcoding gap; DNA barcoding; mitochondrial DNA; reference library; species delimitation; specimen identification	DNA; DELIMITATION; PHYLOGEOGRAPHY; BIODIVERSITY; BIOGEOGRAPHY; HERPETOFAUNA; TAXONOMY; MODELS; ANURA; EAST	English	Article	Web of Science
Cold-water habitats, climate refugia, and their utility for conserving salmonid fishes	2023	10.1139/cjfas-2022-0302	Anthropogenic climate change is warming global temperatures, with significant implications for salmonid fishes that de-pend on the availability of cold water during one or more life stages. Along the southern range extents of many species, and elsewhere that warm temperatures are increasingly problematic, identification and protection or restoration of habitats that may serve as climate refugia w…	stream; climate change; climate refugia; thermal refuge; salmonid; species distribution model	TROUT SALVELINUS-CONFLUENTUS; SPECIES DISTRIBUTION MODELS; EFFECTIVE POPULATION-SIZE; BULL TROUT; BROWN TROUT; STREAM TEMPERATURES; LIFE-HISTORY; BROOK TROUT; ENVIRONMENTAL DNA; CUTTHROAT TROUT	English	Article	Web of Science
Combining surface and soil environmental DNA with artificial cover objects to improve terrestrial reptile survey detection	2022	10.1111/cobi.13939	Reptiles are increasingly of conservation concern due to their susceptibility to habitat loss, emerging disease, and harvest in the wildlife trade. However, reptile populations are often difficult to monitor given the frequency of crypsis in their life history. This difficulty has left uncertain the conservation status of many species and the efficacy of conservation actions unknown. Environmenta…	Detection Probability; Dnaa Superficial; Environmental Monitoring; Little Brown Skink; Monitoreo Ambiental; Probabilidad De Detección; Scincella Lateralis; Scincella Lateralis; Surface Edna; Dna, Environmental; Soil; Crypsis; Dna; Reptile; Species Conservation; Surveying; Visualization; Animal; Ecosystem; Environmental Monitoring; Environmental Protection; Genetics; Procedures; Soil; Animals; Con…	crypsis; DNA; reptile; species conservation; surveying; visualization; animal; ecosystem; environmental monitoring; environmental protection; genetics; procedures; soil; Animals; Conservation of Natural Resources; DNA, Environmental; Ecosystem; Environmental Monitoring; Reptiles; Soil	English	Article	Scopus
Combining surface and soil environmental DNA with artificial cover objects to improve terrestrial reptile survey detection	2022	10.1111/cobi.13939	Reptiles are increasingly of conservation concern due to their susceptibility to habitat loss, emerging disease, and harvest in the wildlife trade. However, reptile populations are often difficult to monitor given the frequency of crypsis in their life history. This difficulty has left uncertain the conservation status of many species and the efficacy of conservation actions unknown. Environmenta…	detection probability; environmental monitoring; little brown skink; Scincella lateralis; surface eDNA; DNAa superficial; monitoreo ambiental; probabilidad de deteccion; Scincella lateralis	AMPHIBIANS; DECLINES	English	Article	Web of Science
Combining surface and soil environmental DNA with artificial cover objects to improve terrestrial reptile survey detection	2022	10.1111/cobi.13939						PubMed
Coming-of-age characterization of soil viruses: A user’s guide to virus isolation, detection within metagenomes, and viromics	2020	10.3390/soilsystems4020023	The study of soil viruses, though not new, has languished relative to the study of marine viruses. This is particularly due to challenges associated with separating virions from harboring soils. Generally, three approaches to analyzing soil viruses have been employed: (1) Isolation, to characterize virus genotypes and phenotypes, the primary method used prior to the start of the 21st century. (2)…	Bioinformatics; Edna; Gene Transfer Agent; Isolate; Metagenome; Plasmid; Ultrasmall Microbes; Virology; Virome; Virus-like Particles		English	Review	Scopus
Coming-of-Age Characterization of Soil Viruses: A User's Guide to Virus Isolation, Detection within Metagenomes, and Viromics	2020	10.3390/soilsystems4020023	The study of soil viruses, though not new, has languished relative to the study of marine viruses. This is particularly due to challenges associated with separating virions from harboring soils. Generally, three approaches to analyzing soil viruses have been employed: (1) Isolation, to characterize virus genotypes and phenotypes, the primary method used prior to the start of the 21st century. (2)…	bioinformatics; eDNA; gene transfer agent; isolate; metagenome; plasmid; ultrasmall microbes; virology; virome; virus-like particles	ESCHERICHIA-COLI; DNA VIRUSES; HUMIC ACIDS; BACTERIA; PHAGE; BACTERIOPHAGES; COMMUNITY; RESISTANCE; LYSOGENY; ECOLOGY	English	Review	Web of Science
Comparative assessment of the intragenomic variations of dinoflagellate Tripos species through single-cell sequencing	2024	10.1016/j.marpolbul.2024.116690	Tripos is a large dinoflagellate genus widely distributed in the world's oceans. Morphology-based species identification is inconclusive due to high morphological intraspecific variability. Metabarcoding analysis has been demonstrated to be effective for species identification and tracking their spatiotemporal dynamics. However, accumulating evidence suggests high levels of intragenomic variation…	Intra-genomic Variations (igvs); Metabarcoding; Molecular Diversity; Single Cell Analysis; Tripos; Rna, Ribosomal, 18s; Illumina Novaseq Platform; Nikon Ts2; Qiagen Gel Extraction Kit; R Package Dada2; Transtaq Hifi Pcr Supermix Ii; Cytology; Genes; Comparative Assessment; Genomics; Haplotypes; Intra-genomic Variation; Metabarcoding; Molecular Diversity; Single Cells; Single Cells Analysis; Speci…	Cytology; Genes; Comparative assessment; Genomics; Haplotypes; Intra-genomic variation; Metabarcoding; Molecular diversity; Single cells; Single cells analysis; Species identification; Tripos; Genome; DNA 18S; environmental DNA; RNA 18S; assessment method; cell; comparative study; dinoflagellate; molecular analysis; species diversity; species richness; Article; bioinformatics; centrifugation; din…	English	Article	Scopus
Comparing microscopy and DNA metabarcoding techniques for identifying cyanobacteria assemblages across hundreds of lakes	2022	10.1016/j.hal.2022.102187	Accurately identifying the species present in an ecosystem is vital to lake managers and successful bioassessment programs. This is particularly important when monitoring cyanobacteria, as numerous taxa produce toxins and can have major negative impacts on aquatic ecosystems. Increasingly, DNA-based techniques such as metabarcoding are being used for measuring aquatic biodiversity, as they could …	16s Rrna Gene Metabarcoding; Cyanobacteria; Edna; Freshwater Lakes; Microcystis Genotypes; Microscopy; Trophic Status; Dna; Dna; Dna; Cyanobacterium; Dna Barcoding; Ecosystem; Genetics; Lake; Microbiology; Microscopy; Cyanobacteria; Dna Barcoding, Taxonomic; Ecosystem; Lakes; Microscopy	DNA; cyanobacterium; DNA barcoding; ecosystem; genetics; lake; microbiology; microscopy; Cyanobacteria; DNA Barcoding, Taxonomic; Ecosystem; Lakes; Microscopy	English	Article	Scopus
Comparing microscopy and DNA metabarcoding techniques for identifying cyanobacteria assemblages across hundreds of lakes	2022	10.1016/j.hal.2022.102187	Accurately identifying the species present in an ecosystem is vital to lake managers and successful bioassessment programs. This is particularly important when monitoring cyanobacteria, as numerous taxa produce toxins and can have major negative impacts on aquatic ecosystems. Increasingly, DNA-based techniques such as metabarcoding are being used for measuring aquatic biodiversity, as they could …	Cyanobacteria; Microscopy; 16s rRNA gene metabarcoding; eDNA; Freshwater lakes; Trophic status; Microcystis genotypes	TEMPERATE LAKES; DIVERSITY; BLOOMS; IDENTIFICATION; DOMINANCE; DIATOM; COMMUNITIES; PATTERNS; TAXONOMY; ECOLOGY	English	Article	Web of Science
Comparing microscopy and DNA metabarcoding techniques for identifying cyanobacteria assemblages across hundreds of lakes	2022	10.1016/j.hal.2022.102187						PubMed
Comparison of DNA metabarcoding and morphological diet analysis of lumpfish ( Cyclopterus lumpus ) as methods of estimating sea lice cleaning efficacy inside commercial Atlantic salmon ( Salmo salar ) sea cages	2024	10.1016/j.aquaculture.2024.740817	Lumpfish (Cyclopterus lumpus) are often used as cleaner fish inside salmonid sea cages for biological control of ectoparasitic sea lice. We compared traditional morphological diet assessments with DNA metabarcoding as methods of estimating lumpfish cleaning efficacy as a function of its size, and of its ingestion of alternative prey. Traditional morphological analysis was performed on 122 ethanol…	Lumpfish cleaning efficacy; Lumpfish size effects; Alternative wild prey; Feed pellet ingestion; Salmon lice haplotypes	POPULATION GENETIC-STRUCTURE; OXIDASE SUBUNIT-I; LEPEOPHTHEIRUS-SALMONIS; EMAMECTIN BENZOATE; MITOCHONDRIAL; PACIFIC; LOUSE; GASTROPODS; PRIMERS; SIZE	English	Article	Web of Science
Comparison of DNA metabarcoding and morphological diet analysis of lumpfish (Cyclopterus lumpus) as methods of estimating sea lice cleaning efficacy inside commercial Atlantic salmon (Salmo salar) sea cages	2024	10.1016/j.aquaculture.2024.740817	Lumpfish (Cyclopterus lumpus) are often used as cleaner fish inside salmonid sea cages for biological control of ectoparasitic sea lice. We compared traditional morphological diet assessments with DNA metabarcoding as methods of estimating lumpfish cleaning efficacy as a function of its size, and of its ingestion of alternative prey. Traditional morphological analysis was performed on 122 ethanol…	Alternative Wild Prey; Feed Pellet Ingestion; Lumpfish Cleaning Efficacy; Lumpfish Size Effects; Salmon Lice Haplotypes; Abundance; Amphipod; Biological Control; Biomass; Cage Culture; Cleaner Fish; Commercial Species; Comparative Study; Crustacean; Diet; Estimation Method; Fish; Mitochondrial Dna; Morphology; Wild Population; Canada; Newfoundland; Newfoundland And Labrador	abundance; amphipod; biological control; biomass; cage culture; cleaner fish; commercial species; comparative study; crustacean; diet; estimation method; fish; mitochondrial DNA; morphology; wild population; Canada; Newfoundland; Newfoundland and Labrador	English	Article	Scopus
Composition and distribution of fish environmental DNA in an Adirondack watershed	2021	10.7717/peerj.10539	Background: Environmental DNA (eDNA) surveys are appealing options for monitoring aquatic biodiversity. While factors affecting eDNA persistence, capture and amplification have been heavily studied, watershed-scale surveys of fish communities and our confidence in such need further exploration. Methods: We characterized fish eDNA compositions using rapid, low-volume filtering with replicate and c…	Barcode Sequencing; Computational Biology; Dam Removal; Environmental Dna; Fisheries Restoration; Metagenetics; Mitochondrial 12s Ribosomal Rna; New York State; Cetrimide; Chloroform; Dna Polymerase; Ethidium Bromide; Isopentyl Alcohol; Phenol; Pyroxylin; Gotaq Flexi; Cetrimide; Chloroform; Deionized Water; Dna Polymerase; Environmental Dna; Ethidium Bromide; Gotaq Flexi; Isopentyl Alcohol; Pheno…	cetrimide; chloroform; deionized water; DNA polymerase; environmental DNA; ethidium bromide; gotaq flexi; isopentyl alcohol; phenol; primer DNA; pyroxylin; RNA 12S; RNA 16S; Article; controlled study; DNA barcoding; DNA base composition; DNA determination; DNA extraction; environmental dna composition; environmental dna distribution; environmental factor; fish; genetic procedures; haplotype; high…	English	Article	Scopus
Composition and distribution of fish environmental DNA in an Adirondack watershed	2021	10.7717/peerj.10539	Background: Environmental DNA (eDNA) surveys are appealing options for monitoring aquatic biodiversity. While factors affecting eDNA persistence, capture and amplification have been heavily studied, watershed-scale surveys of fish communities and our confidence in such need further exploration. Methods: We characterized fish eDNA compositions using rapid, low-volume filtering with replicate and c…	Environmental DNA; Barcode sequencing; Metagenetics; Computational biology; Mitochondrial 12S ribosomal RNA; New York state; Dam removal; Fisheries restoration	EDNA DETECTION; TEMPERATURE; ASSIGNMENT; SEQUENCES; ALIGNMENT	English	Article	Web of Science
Composition and distribution of fish environmental DNA in an Adirondack watershed	2021	10.7717/peerj.10539						PubMed
Conditionally autoregressive models improve occupancy analyses of autocorrelated data: An example with environmental DNA	2019	10.1111/1755-0998.12949	Site occupancy-detection models (SODMs) are statistical models widely used for biodiversity surveys where imperfect detection of species occurs. For instance, SODMs are increasingly used to analyse environmental DNA (eDNA) data, taking into account the occurrence of both false-positive and false-negative errors. However, species occurrence data are often characterized by spatial and temporal auto…	Conditionally Autoregressive Model; Sedimentary Dna; Spatial Autocorrelation; Species Occupancy-detection Model; Temporal Autocorrelation; True Skill Statistics; Dna; Dna; Dna; Biostatistics; Biota; Genetics; Population Genetics; Procedures; Spatiotemporal Analysis; Biostatistics; Biota; Genetics, Population; Spatio-temporal Analysis	DNA; biostatistics; biota; genetics; population genetics; procedures; spatiotemporal analysis; Biostatistics; Biota; Genetics, Population; Spatio-Temporal Analysis	English	Article	Scopus
Conservation challenges for the most threatened family of marine bony fishes (handfishes: Brachionichthyidae)	2020	10.1016/j.biocon.2020.108831	Marine species live out-of-sight, consequently geographic range, population size and long-term trends are extremely difficult to characterise for accurate conservation status assessments. Detection challenges have precluded listing of marine bony fishes as Extinct on the International Union for Conservation of Nature (IUCN) Red List, until now (March 2020). Our data compilation on handfishes (Fam…	Biodiversity Loss; Conservation; Endangered; Extinction; Population Assessment; Tasmania; Climate Change; Conservation Status; Endangered Species; Extinction; Habitat Quality; Risk Assessment; Spawning; Wild Population; Brachionichthyidae; Brachionichthys; Osteichthyes; Tasmania; Varanidae	climate change; conservation status; endangered species; extinction; habitat quality; risk assessment; spawning; wild population; Brachionichthyidae; Brachionichthys; Osteichthyes; Tasmania; Varanidae	English	Article	Scopus
Conservation challenges for the most threatened family of marine bony fishes (handfishes: Brachionichthyidae)	2020	10.1016/j.biocon.2020.108831	Marine species live out-of-sight, consequently geographic range, population size and long-term trends are extremely difficult to characterise for accurate conservation status assessments. Detection challenges have precluded listing of marine bony fishes as Extinct on the International Union for Conservation of Nature (IUCN) Red List, until now (March 2020). Our data compilation on handfishes (Fam…	Conservation; Extinction; Tasmania; Endangered; Biodiversity loss; Population assessment	EXTINCTION RISK; VARIABILITY; TASMANIA; OCEAN	English	Article	Web of Science
Conservation Genetics in the Neotropics	2023	10.1007/978-3-031-34854-9	This book explores how genetics and the new technologies in genomics have been used for conservation of plants and animals in the Neotropics. It shows the new perspective for conservation genetics beyond the use of theoretical and methods in genetics at species level and presents how genetics and genomics can be used for assessing communities. Conservation genetics and genomics are presented as a…	Adaptive Genetics; Conservation Genetics; Environmental Dna; Forensic Genetics Conservation Genomics; Hidden Biodiversity; Molecular Phylogeny; Population Genetics; Science Learning And Conservation; Species Delimitation; Animals; Biodiversity; Conservation; Decision Making; Ecology; Genes; Molecular Biology; Plants (botany); Adaptive Genetic; Conservation Genetic; Environmental Dna; Forensic Gen…	Animals; Biodiversity; Conservation; Decision making; Ecology; Genes; Molecular biology; Plants (botany); Adaptive genetic; Conservation genetic; Environmental DNA; Forensic genetic conservation genomic; Genomics; Hidden biodiversity; Molecular phylogeny; Population genetics; Science learning; Science learning and conservation; Species delimitation; Risk assessment	English	Book	Scopus
Conservation genetics of elasmobranchs of the Mexican Pacific Coast, trends and perspectives	2019	10.1016/bs.amb.2019.08.002	One of the most critical threats to biodiversity is the high extinction rate driven by human activities. Reducing extinction rates requires the implementation of conservation programmes based on robust scientific data. Elasmobranchs are important ecological components of the ocean, and several species sustain substantial economic activities. Unfortunately, elasmobranchs are one of the most threat…		EFFECTIVE POPULATION-SIZE; TRIAKIS-SEMIFASCIATA POPULATIONS; BROWN SMOOTHHOUND SHARK; MULTIPLE PATERNITY; MITOCHONDRIAL-DNA; BLUE SHARK; GLOBAL PHYLOGEOGRAPHY; EVOLUTIONARY HISTORY; FISHERIES MANAGEMENT; ENVIRONMENTAL DNA	English	Review	Web of Science
Conservative Sex and the Benefits of Transformation in Streptococcus pneumoniae	2013	10.1371/journal.ppat.1003758	Natural transformation has significant effects on bacterial genome evolution, but the evolutionary factors maintaining this mode of bacterial sex remain uncertain. Transformation is hypothesized to have both positive and negative evolutionary effects on bacteria. It can facilitate adaptation by combining beneficial mutations into a single individual, or reduce the mutational load by exposing dele…	Article; Bacterial Genome; Bacterial Growth; Bacterial Strain; Bacterium Competence; Bacterium Transformation; Cell Density; Chemostat; Controlled Study; Dna Isolation; Dna Repair; Gene Sequence; Genetic Conservation; Genomic Instability; Minimum Inhibitory Concentration; Mutation; Mutation Rate; Nonhuman; Nucleotide Sequence; Sex Transformation; Single Nucleotide Polymorphism; Streptococcus Pneu…	article; bacterial genome; bacterial growth; bacterial strain; bacterium competence; bacterium transformation; cell density; chemostat; controlled study; DNA isolation; DNA repair; gene sequence; genetic conservation; genomic instability; minimum inhibitory concentration; mutation; mutation rate; nonhuman; nucleotide sequence; sex transformation; single nucleotide polymorphism; Streptococcus pneu…	English	Article	Scopus
Conservative Sex and the Benefits of Transformation in Streptococcus pneumoniae	2013	10.1371/journal.ppat.1003758	Natural transformation has significant effects on bacterial genome evolution, but the evolutionary factors maintaining this mode of bacterial sex remain uncertain. Transformation is hypothesized to have both positive and negative evolutionary effects on bacteria. It can facilitate adaptation by combining beneficial mutations into a single individual, or reduce the mutational load by exposing dele…		TERM EXPERIMENTAL EVOLUTION; ESCHERICHIA-COLI; GENETIC-TRANSFORMATION; HAEMOPHILUS-INFLUENZAE; HELICOBACTER-PYLORI; NATURAL COMPETENCE; MUTATIONAL LOAD; STRESS; POPULATION; ADAPTATION	English	Article	Web of Science
Conservative sex and the benefits of transformation in Streptococcus pneumoniae	2013	10.1371/journal.ppat.1003758						PubMed
Conserving genetic and morphological potential: Preserving larval fish for downstream analysis	2025	10.1093/najfmt/vqaf004	Objective: Current methods for larval fish preservation impede molecular analyses and hinder our ability to modernize monitoring programs using the latest molecular technologies. We tested seven candidate preservatives (10% buffered formalin, 10% hydantoin, 50% ethanol, 70% ethanol, 70% DESS [a solution containing dimethyl sulfoxide, disodium EDTA, and saturated NaCl], 70% Excell Plus, and 70% DN…	#NAME?	DNA; endangered species; fish; fishery management; larva; morphometry	English	Article	Scopus
Conserving genetic and morphological potential: Preserving larval fish for downstream analysis	2025	10.1093/najfmt/vqaf004	Objective Current methods for larval fish preservation impede molecular analyses and hinder our ability to modernize monitoring programs using the latest molecular technologies. We tested seven candidate preservatives (10% buffered formalin, 10% hydantoin, 50% ethanol, 70% ethanol, 70% DESS [a solution containing dimethyl sulfoxide, disodium EDTA, and saturated NaCl], 70% Excell Plus, and 70% DNA…	cryptic species identification; eDNA; fisheries management; morphometrics; SHERLOCK; specimen preservation; -threatened and endangered species	SAN-FRANCISCO ESTUARY; PRESERVATION TECHNIQUE; ENVIRONMENTAL DNA; DELTA SMELT; FIXATION; MISIDENTIFICATION; CAPTURE; ETHANOL	English	Article	Web of Science
Considerations and consequences of allowing DNA sequence data as types of fungal taxa	2018	10.5598/imafungus.2018.09.01.10	Nomenclatural type definitions are one of the most important concepts in biological nomenclature. Being physical objects that can be re-studied by other researchers, types permanently link taxonomy (an artificial agreement to classify biological diversity) with nomenclature (an artificial agreement to name biological diversity). Two proposals to amend the International Code of Nomenclature for al…	Imc11 Nomenclature; Speciation; Taxonomy; Typification; Voucherless Fungi		English	Article	Scopus
Considerations and consequences of allowing DNA sequence data as types of fungal taxa	2018	10.5598/imafungus.2018.09.01.10	Nomenclatural type definitions are one of the most important concepts in biological nomenclature. Being physical objects that can be re-studied by other researchers, types permanently link taxonomy (an artificial agreement to classify biological diversity) with nomenclature (an artificial agreement to name biological diversity). Two proposals to amend the International Code of Nomenclature for al…	IMC11; nomenclature; speciation; taxonomy; typification; voucherless fungi	INTERNAL TRANSCRIBED SPACER; IN-SITU HYBRIDIZATION; SPECIES DELIMITATION; RIBOSOMAL-RNA; GENE TREES; POSITIVE SELECTION; SMALL-SUBUNIT; RDNA REGION; NUCLEAR; IDENTIFICATION	English	Article	Web of Science
Considerations and consequences of allowing DNA sequence data as types of fungal taxa	2018	10.5598/imafungus.2018.09.01.10						PubMed
Construction, characterization, and use of small-insert gene banks of DNA isolated from soil and enrichment cultures for the recovery of novel amidases	2004	10.1111/j.1462-2920.2004.00643.x	To obtain new amidases of biocatalytic relevance, we used microorganisms indigenous to different types of soil and sediment as a source of DNA for the construction of environmental gene banks, following two different strategies. In one case, DNA was isolated from soil without preceding cultivation to preserve a high degree of (phylo)genetic diversity. Alternatively, DNA samples were obtained from…		PENICILLIN ACYLASE; ENVIRONMENTAL DNA; METAGENOME; LIBRARIES; DIVERSITY; BACTERIA; CLONING	English	Article	Web of Science
Contamination during criminal investigation: Detecting police contamination and secondary DNA transfer from evidence bags	2016	10.1016/j.fsigen.2016.04.003	As the profiling systems used in forensic analyses have become more sensitive in recent years, the risk of detecting a contamination in a DNA sample has increased proportionally. This requires more stringent work protocols and awareness to minimize the chance of contamination. Although there is high consciousness on contamination and best practice procedures in forensic labs, the same requirement…	Contamination; Dna; Forensic; Transfer; Dna; Dna; Ampflstr; Sgm Plus; Dna; Allele; Article; Controlled Study; Court; Crime; Dna Contamination; Dna Determination; Dna Fingerprinting; Dna Transfer; Evidence Bag; Forensic Genetics; Genetic Analyzer; Human; Laboratory Personnel; Legal Evidence; Major Clinical Study; Medical Device; Nucleic Acid Analysis; Pilot Study; Police; Priority Journal; Quantit…	DNA; allele; Article; controlled study; court; crime; DNA contamination; DNA determination; DNA fingerprinting; DNA transfer; evidence bag; forensic genetics; genetic analyzer; human; laboratory personnel; legal evidence; major clinical study; medical device; nucleic acid analysis; pilot study; police; priority journal; quantitative analysis; short tandem repeat; training; wipe test; adverse effe…	English	Article	Scopus
Contrasting results of multiple species delimitation approaches cause uncertainty in synecological studies: A case study on Sri Lankan chafers	2023	10.1111/icad.12684	Biodiversity patterns are the sum of multiple overlapping species distributions. Their analysis therefore requires proper species inference. DNA-based species delimitation has become increasingly popular for such assessments, but their robustness is often problematic due to incongruence between multiple delimitation approaches.Here, we explored how contrasting results of different species' delimi…	assemblage similarity; DNA-based species delimitation; integrative taxonomy; MOTUs; Scarabaeidae; Sri Lanka	BIODIVERSITY ASSESSMENT; ENVIRONMENTAL DNA; GENETIC DIVERSITY; MAXIMUM-LIKELIHOOD; COLEOPTERA; TAXONOMY; PATTERNS; IDENTIFICATION; MORPHOLOGY; EVOLUTION	English	Article	Web of Science
Correlating the above- and belowground genotype of Pinus pinaster trees and rhizosphere bacterial communities under drought conditions	2022	10.1016/j.scitotenv.2022.155007	Increasing temperatures along with severe droughts are factors that may jeopardize the survival of the forests in the Mediterranean basin. In this region, Pinus pinaster is a common conifer species, that has been used as a model species in evolutionary studies due to its adaptive response to changing environments. Although its drought tolerance mechanisms are already known, knowledge about the dy…	Drought; Mediterranean Basin; Metabarcoding; Microbial Co-occurrence Networks; Rhizosphere; Tree Genotype; Rna; Rna; Agronomy; Bacteria; Biosynthesis; Climate Change; Complex Networks; Dna; Forestry; Plants (botany); Rna; Soils; Bacterial Community; Co-occurrence Networks; Community Is; Drought Conditions; Mediterranean Basin; Metabarcoding; Microbial Co-occurrence Network; Microbiotas; Pinus Pin…	Agronomy; Bacteria; Biosynthesis; Climate change; Complex networks; DNA; Forestry; Plants (botany); RNA; Soils; Bacterial community; Co-occurrence networks; Community IS; Drought conditions; Mediterranean basin; Metabarcoding; Microbial co-occurrence network; Microbiotas; Pinus pinaster; Tree genotype; Drought; environmental DNA; aboveground biomass; abundance; belowground biomass; coniferous tre…	English	Article	Scopus
Correlating the above- and belowground genotype of Pinus pinaster trees and rhizosphere bacterial communities under drought conditions	2022	10.1016/j.scitotenv.2022.155007	Increasing temperatures along with severe droughts are factors that may jeopardize the survival of the forests in the Mediterranean basin. In this region, Pinus pinaster is a common conifer species, that has been used as a model species in evolutionary studies due to its adaptive response to changing environments. Although its drought tolerance mech-anisms are already known, knowledge about the d…	Mediterranean basin; Tree genotype; Drought; Rhizosphere; Metabarcoding; Microbial co-occurrence networks	SEASONAL DYNAMICS; MICROSATELLITE LOCI; SOIL FUNGAL; MICROBIOME; TEMPERATE; SHAPE; DIVERSITY; INFERENCE; PATTERNS; ECOLOGY	English	Article	Web of Science
Correlating the above- and belowground genotype of Pinus pinaster trees and rhizosphere bacterial communities under drought conditions	2022	10.1016/j.scitotenv.2022.155007						PubMed
Cryptic Diversity and Climatic Niche Divergence of Brillia Kieffer (Diptera: Chironomidae): Insights from a Global DNA Barcode Dataset	2025	10.3390/insects16070675	Accurate species identification of small aquatic insects remains challenging due to their morphological similarities. This study addresses this issue by developing a DNA barcode reference library for the globally distributed Brillia (Diptera: Chironomidae). We analyzed cytochrome c oxidase subunit I (COI) sequences of 241 specimens belonging to 13 Brillia species from 18 countries, including 56 n…	cryptic species; DNA barcoding; COI	ENVIRONMENTAL DNA; TAXONOMY; POPULATION; MORPHOLOGY; INSECTA; GENERA	English	Article	Web of Science
Cryptic invasions: A review	2018	10.1016/j.scitotenv.2017.06.133	Cryptic invasions are defined as the introduction and spread of non-native lineages within the species' native range (intra-specific cryptic invasion) or the invasion of non-native species that goes unnoticed due to misidentification as a native or another invasive species (inter-specific cryptic invasion). While population-specific attributes are acknowledged to play a critical role in the succe…	Conspecific invader; Biological invasions; Bibliometric; Invasiveness	FERRISSIA-FRAGILIS TRYON; PHRAGMITES-AUSTRALIS; ENVIRONMENTAL DNA; GRACILARIA-VERMICULOPHYLLA; GENETIC DIVERSITY; COMMON REED; BIOLOGICAL INVASIONS; CIONA-SAVIGNYI; 1ST RECORD; HYBRIDIZATION	English	Review	Web of Science
Cultured and genetic diversity, and activities of sulfur-oxidizing bacteria in low-temperature hydrothermal fluids of the North Fiji Basin	2004	10.3354/meps266065	We determined key chemical parameters and thiosulfate oxidation in low-temperature hydrothermal fluids from the North Fiji Basin. In addition, the bacterial diversity (with the main emphasis on sulfur-oxidizing bacteria) was investigated. The hydrothermal fluids had low concentrations of sulfide (up to 50.0 μM) and increased counts of both total bacteria and sulfur-oxidizing bacteria compared to …	Bacterial Diversity; Hydrothermal Vents; Sulfur Bacteria; Thiosulfate Oxidation; Bacterium; Genetic Variation; Hydrothermal Vent; Oxidation; Species Diversity; Sulfur; North Fiji Basin; Pacific Ocean; Bacteria (microorganisms); Cytophaga; Flavobacterium; Gammaproteobacteria; Prokaryota; Proteobacteria	bacterium; genetic variation; hydrothermal vent; oxidation; species diversity; sulfur; North Fiji Basin; Pacific Ocean; Bacteria (microorganisms); Cytophaga; Flavobacterium; Gammaproteobacteria; Prokaryota; Proteobacteria	English	Article	Scopus
Cultured and genetic diversity, and activities of sulfur-oxidizing bacteria in low-temperature hydrothermal fluids of the North Fiji Basin	2004	10.3354/meps266065	We determined key chemical parameters and thiosuffate oxidation in low-temperature hydrothermal fluids from the North Fiji Basin. In addition, the bacterial diversity (with the main emphasis on sulfur-oxidizing bacteria) was investigated. The hydrothermal fluids had low concentrations of sulfide (up to 50.0 muM) and increased counts of both total bacteria and sulfur-oxidizing bacteria compared to…	hydrothermal vents; thiosulfate oxidation; sulfur bacteria; bacterial diversity	VENT MICROBIAL COMMUNITIES; RDNA-BASED PHYLOGENY; 16S RIBOSOMAL-RNA; SEA SEDIMENTS; MARINE; THIOSULFATE; GRADIENT; ECOLOGY; GROWTH; PLUMES	English	Article	Web of Science
Culture-dependent and culture-independent diversity within the obligate marine actinomycete genus Salinispora	2005	10.1128/AEM.71.11.7019-7028.2005	Salinispora is the first obligate marine genus within the order Actinomycetales and a productive source of biologically active secondary metabolites. Despite a worldwide, tropical or subtropical distribution in marine sediments, only two Salinispora species have thus far been cultivated, suggesting limited species-level diversity. To further explore Salinispora diversity and distributions, the ph…	Culture Media; Dna, Bacterial; Rna, Ribosomal, 16s; Biodiversity; Marine Applications; Microorganisms; Sediments; Environmental Clone Libraries; Phylotype; Salinispora; Genes; Taq Polymerase; Bacterium; Detection Method; Polymerase Chain Reaction; Secondary Metabolite; Species Diversity; Actinobacteria; Article; Bacterial Growth; Bacterial Strain; Bacterium Culture; Bacterium Detection; Bahamas; …	Biodiversity; Marine applications; Microorganisms; Sediments; Environmental clone libraries; Phylotype; Salinispora; Genes; Taq polymerase; bacterium; detection method; polymerase chain reaction; secondary metabolite; species diversity; Actinobacteria; article; bacterial growth; bacterial strain; bacterium culture; bacterium detection; Bahamas; DNA extraction; marine environment; microbial divers…	English	Article	Scopus
Culture-dependent and culture-independent diversity within the obligate marine actinomycete genus Salinispora	2005	10.1128/AEM.71.11.7019-7028.2005	Salinispora is the first obligate marine genus within the order Actinomycetales and a productive source of biologically active secondary metabolites. Despite a worldwide, tropical or subtropical distribution in marine sediments, only two Salinispora species have thus far been cultivated, suggesting limited species-level diversity. To further explore Salinispora diversity and distributions, the ph…		BACTERIAL RIBOSOMAL-RNA; OCEAN SEDIMENTS; SOIL; POLYMERASE; DNA; AMPLIFICATION; POPULATIONS; SALINOSPORA; OPERONS	English	Article	Web of Science
Culture-dependent and culture-independent diversity within the obligate marine actinomycete genus Salinispora	2005	10.1128/AEM.71.11.7019-7028.2005						PubMed
Culturing and environmental DNA sequencing uncover hidden kinetoplastid biodiversity and a major clade within ancestrally freshwater Neobodo designis	2005	10.1099/ijs.0.63606-0	Bodonid flagellates (class Kinetoplastea) are abundant, free-living protozoa in freshwater, soil and marine habitats, with undersampled global biodiversity. To investigate overall bodonid diversity, kinetoplastid-specific PCR primers were used to amplify and sequence 18S rRNA genes from DNA extracted from 16 diverse environmental samples; of 39 different kinetoplastid sequences, 35 belong to the …	Dna; Rna, Ribosomal, 18s; Dna; Fresh Water; Primer Rna; Rna 16s; Rna 18s; Article; Biodiversity; Biogeography; Cladistics; Classification; Controlled Study; Culture Technique; Dna Extraction; Dna Sequence; Flagellate; Gene Amplification; Gene Sequence; Genetic Variability; Genus; Marine Environment; Micromorphology; Neobodo Designis; Nonhuman; Nucleotide Sequence; Polymerase Chain Reaction; Prior…	DNA; fresh water; primer RNA; RNA 16S; RNA 18S; article; biodiversity; biogeography; cladistics; classification; controlled study; culture technique; DNA extraction; DNA sequence; flagellate; gene amplification; gene sequence; genetic variability; genus; marine environment; micromorphology; Neobodo designis; nonhuman; nucleotide sequence; polymerase chain reaction; priority journal; sampling; seq…	English	Article	Scopus
Culturing and environmental DNA sequencing uncover hidden kinetoplastid biodiversity and a major marine clade within ancestrally freshwater Neobodo designis	2005	10.1099/ijs.0.63606-0	Bodonid flagellates (class Kinetoplastea) are abundant, free-living protozoa in freshwater, soil and marine habitats, with undersampled global biodiversity. To investigate overall bodonid diversity, kinetoplastid-specific PCR primers were used to amplify and sequence 18S rRNA genes from DNA extracted from 16 diverse environmental samples; of 39 different kinetoplastid sequences, 35 belong to the …		HETEROTROPHIC AMEBAS; HYDROTHERMAL VENTS; MOLECULAR EVIDENCE; DIVERSITY; PHYLOGENY; SEDIMENTS; KINGDOMS; CLASSIFICATION; FORAMINIFERA; EVOLUTION	English	Article	Web of Science
Culturing and environmental DNA sequencing uncover hidden kinetoplastid biodiversity and a major marine clade within ancestrally freshwater Neobodo designis	2005	10.1099/ijs.0.63606-0						PubMed
Cytochrome oxidase i sequences from northern and southern california suggest cryptic baetis (Ephemeroptera: Baetidae) Species	2019	10.3398/064.079.0207	The geographically widespread mayfly genus Baetis occurs from the subarctic to tropical regions of the world. Many of the 20 described Baetis species in North America are known to show cryptic species diversity. However, studies of Baetis that have examined morphology and genetic diversity have found mixed results in terms of cryptic species, with some studies indicating a complex of related spec…			English	Article	Scopus
Cytochrome oxidase I sequences from northern and southern California suggest cryptic Baetis (Ephemeroptera: Baetidae) species	2019	10.3398/064.079.0207	The geographically widespread mayfly genus Baetis occurs from the subarctic to tropical regions of the world. Many of the 20 described Baetis species in North America are known to show cryptic species diversity. However, studies of Baetis that have examined morphology and genetic diversity have found mixed results in terms of cryptic species, with some studies indicating a complex of related spec…		POPULATION GENETIC-STRUCTURE; RHODANI EPHEMEROPTERA; STREAMS; DIVERSITY; TRICHOPTERA; TAXONOMY; PATTERNS; MACROINVERTEBRATES; SERICOSTOMATIDAE; DIFFERENTIATION	English	Article	Web of Science
Degenerate PCR primers to reveal the diversity of giant viruses in coastal waters	2018	10.3390/v10090496	“Megaviridae” is a proposed family of giant viruses infecting unicellular eukaryotes. These viruses are ubiquitous in the sea and have impact on marine microbial community structure and dynamics through their lytic infection cycle. However, their diversity and biogeography have been poorly characterized due to the scarce detection of Megaviridae sequences in metagenomes, as well as the limitation…	B Family Dna Polymerase (polb); Megaviridae; Meta-barcode; Metagenome; Mimiviridae; Primer Dna; Sea Water; Amino Acid Sequence; Article; Coastal Waters; Dna Extraction; Dna Sequence; Genetic Variability; Genotype; Giant Virus; Metagenome; Microbial Diversity; Nonhuman; Nucleotide Sequence; Phylogenetic Tree; Polymerase Chain Reaction; Sequence Alignment; Structural Gene; Biodiversity; Biology; Cl…	primer DNA; sea water; amino acid sequence; Article; coastal waters; DNA extraction; DNA sequence; genetic variability; genotype; giant virus; metagenome; microbial diversity; nonhuman; nucleotide sequence; phylogenetic tree; polymerase chain reaction; sequence alignment; structural gene; biodiversity; biology; classification; genetics; metagenomics; microbiology; phylogeny; procedures; virology;…	English	Article	Scopus
Delimiting species using single-locus data and the generalized mixed yule coalescent approach: A revised method and evaluation on simulated data sets	2013	10.1093/sysbio/syt033	DNA barcoding-type studies assemble single-locus data from large samples of individuals and species, and have provided new kinds of data for evolutionary surveys of diversity. An important goal of many such studies is to delimit evolutionarily significant species units, especially in biodiversity surveys from environmental DNA samples. The Generalized Mixed Yule Coalescent (GMYC) method is a like…			English	Article	Scopus
Delimiting Species Using Single-Locus Data and the Generalized Mixed Yule Coalescent Approach: A Revised Method and Evaluation on Simulated Data Sets	2013	10.1093/sysbio/syt033	DNA barcoding-type studies assemble single-locus data from large samples of individuals and species, and have provided new kinds of data for evolutionary surveys of diversity An important goal of many such studies is to delimit evolutionarily significant species units, especially in biodiversity surveys from environmental DNA samples. The Generalized Mixed Yule Coalescent (GMYC) method is a likel…	Clusters; coalescent; DNA; genealogical; neutral; speciation; species	DIVERSIFICATION RATES; MOLECULAR PHYLOGENIES; GENETIC-VARIATION; DIVERGENCE TIMES; DNA-SEQUENCES; DELIMITATION; TREES; SPECIATION; EVOLUTION; BARCODES	English	Article	Web of Science
Delimiting species using single-locus data and the Generalized Mixed Yule Coalescent approach: a revised method and evaluation on simulated data sets	2013	10.1093/sysbio/syt033						PubMed
Demonstration of the Use of Environmental DNA for the Non-Invasive Genotyping of a Bivalve Mollusk, the European Flat Oyster (Ostrea edulis)	2019	10.3389/fgene.2019.01159	Accurate SNP (single nucleotide polymorphism) genotype information is critical for a wide range of selective breeding applications in aquaculture, including parentage assignment, marker-assisted, and genomic selection. However, the sampling of tissue for genetic analysis can be invasive for juvenile animals or taxa where sampling tissue is difficult or may cause mortality (e.g. bivalve mollusks).…	Broodstock; Hatchery Management; Minimally Invasive Sampling; Mollusk Aquaculture; Non-invasive Genetic Sampling; Single Nucleotide Polymorphism Genotyping; Dna; Dna; Environmental Dna; Sea Water; Unclassified Drug; Animal Experiment; Animal Tissue; Animal Welfare; Aquaculture; Article; Dna Extraction; Filtration; Genetic Analysis; Genotype; Genotyping Technique; Hatchery; Measurement Accuracy; N…	DNA; environmental DNA; sea water; unclassified drug; animal experiment; animal tissue; animal welfare; aquaculture; Article; DNA extraction; filtration; genetic analysis; genotype; genotyping technique; hatchery; measurement accuracy; non invasive procedure; nonhuman; Ostrea edulis; polymerase chain reaction; selective breeding; single nucleotide polymorphism	English	Article	Scopus
Demonstration of the Use of Environmental DNA for the Non-Invasive Genotyping of a Bivalve Mollusk, the European Flat Oyster (Ostrea edulis)	2019	10.3389/fgene.2019.01159	Accurate SNP (single nucleotide polymorphism) genotype information is critical for a wide range of selective breeding applications in aquaculture, including parentage assignment, marker-assisted, and genomic selection. However, the sampling of tissue for genetic analysis can be invasive for juvenile animals or taxa where sampling tissue is difficult or may cause mortality (e.g. bivalve mollusks).…	broodstock; hatchery management; single nucleotide polymorphism genotyping; mollusk aquaculture; minimally invasive sampling; non-invasive genetic sampling	CRASSOSTREA-GIGAS; PACIFIC OYSTERS; AQUACULTURE; VALIDATION; EXTRACTION; NONLETHAL; EDNA	English	Article	Web of Science
Demonstration of the Use of Environmental DNA for the Non-Invasive Genotyping of a Bivalve Mollusk, the European Flat Oyster (Ostrea edulis)	2019	10.3389/fgene.2019.01159						PubMed
Denaturing gradient gel electrophoresis can rapidly display the bacterial diversity contained in 16S rDNA clone libraries	2006	10.1007/s00248-006-9050-z	Two different strategies for molecular analysis of bacterial diversity, 16S rDNA cloning and denaturing gradient gel electrophoresis (DGGE), were combined into a single protocol that took advantage of the best attributes of each: the ability of cloning to package DNA sequence information and the ability of DGGE to display a community profile. In this combined protocol, polymerase chain reaction p…	Dna Primers; Dna, Ribosomal; Rna, Ribosomal, 16s; Primer Dna; Ribosome Dna; Rna 16s; Bacterium; Clone; Dna; Electrokinesis; Microbial Community; Molecular Analysis; Polymerase Chain Reaction; Article; Classification; Genetics; Nucleotide Sequence; Polyacrylamide Gel Electrophoresis; Species Difference; Bacteria; Base Sequence; Dna Primers; Dna, Ribosomal; Electrophoresis, Polyacrylamide Gel; Rna,…	primer DNA; ribosome DNA; RNA 16S; bacterium; clone; DNA; electrokinesis; microbial community; molecular analysis; polymerase chain reaction; article; classification; genetics; nucleotide sequence; polyacrylamide gel electrophoresis; species difference; Bacteria; Base Sequence; DNA Primers; DNA, Ribosomal; Electrophoresis, Polyacrylamide Gel; RNA, Ribosomal, 16S; Species Specificity; Bacteria (mi…	English	Article	Scopus
Denaturing gradient gel electrophoresis can rapidly display the bacterial diversity contained in 16S rDNA clone libraries	2006	10.1007/s00248-006-9050-z	Two different strategies for molecular analysis of bacterial diversity, 16S rDNA cloning and denaturing gradient gel electrophoresis (DGGE), were combined into a single protocol that took advantage of the best attributes of each: the ability of cloning to package DNA sequence information and the ability of DGGE to display a community profile. In this combined protocol, polymerase chain reaction p…		MICROBIAL DIVERSITY; RIBOSOMAL-RNA; COMMUNITY STRUCTURE; SOILS; POPULATIONS; GENES; DGGE; PCR; IDENTIFICATION; CULTIVATION	English	Article	Web of Science
Denaturing gradient gel electrophoresis can rapidly display the bacterial diversity contained in 16S rDNA clone libraries	2006	10.1007/s00248-006-9050-z						PubMed
Density-dependent effects of exotic brook trout on aquatic communities in mountain lakes revealed by environmental DNA and morphological taxonomy	2024	10.1007/s10750-023-05398-x	Invasion of non-native fishes threatens freshwater biodiversity worldwide. Yet, detailed estimates of population demography for invasive species, such as population size and body size, are rarely integrated in evaluating aquatic community responses. Our study capitalised on detailed brook trout population demographic data collected for a replicated whole lake ecosystem experiment involving experi…	Cytochrome Oxidase I; Invasive Salmonids; Lake Restoration; Macroinvertebrates; Metabarcoding; Zooplankton; Aquatic Community; Biodiversity; Demography; Density Dependence; Environmental Restoration; Gene; Invasive Species; Lake Ecosystem; Macroinvertebrate; Morphology; Mountain Region; Population Size; Salmonid; Taxonomy; Zooplankton	aquatic community; biodiversity; demography; density dependence; environmental restoration; gene; invasive species; lake ecosystem; macroinvertebrate; morphology; mountain region; population size; salmonid; taxonomy; zooplankton	English	Article	Scopus
Density-dependent effects of exotic brook trout on aquatic communities in mountain lakes revealed by environmental DNA and morphological taxonomy	2024	10.1007/s10750-023-05398-x	Invasion of non-native fishes threatens freshwater biodiversity worldwide. Yet, detailed estimates of population demography for invasive species, such as population size and body size, are rarely integrated in evaluating aquatic community responses. Our study capitalised on detailed brook trout population demographic data collected for a replicated whole lake ecosystem experiment involving experi…	Metabarcoding; Invasive salmonids; Cytochrome oxidase I; Lake restoration; Macroinvertebrates; Zooplankton	ZOOPLANKTON COMMUNITIES; FOOD-WEB; FISH; RECOVERY; INVERTEBRATES; POPULATIONS; RESISTANCE; SPORTFISH; PREDATOR; IMPACTS	English	Article	Web of Science
Density-dependent resource partitioning of temperate large herbivore populations under rewilding	2025	10.1002/eap.70090	In tropical grazer assemblies with abundant large predators, smaller herbivores have been shown to be limited by predation and food quality, while the larger species are regulated by food abundance. Much less is known about herbivore resource partitioning in temperate grazing ecosystems, where humans typically regulate large animal abundances. The Oostvaardersplassen ecosystem in the Netherlands …	Culling; Diet Quantification; Ecosystem Management; Environmental Dna; Grazing Ecosystems; Niche Overlap; Rewilding; Animal Welfare; Biodiversity; Carrying Capacity; Culling; Dna; Ecosystem Management; Herbivore; Niche Overlap; Niche Partitioning; Resource Availability; Netherlands; Animal; Bovine; Deer; Diet; Ecosystem; Environmental Protection; Goose; Herbivory; Horse; Physiology; Population De…	animal welfare; biodiversity; carrying capacity; culling; DNA; ecosystem management; herbivore; niche overlap; niche partitioning; resource availability; Netherlands; animal; bovine; deer; diet; ecosystem; environmental protection; goose; herbivory; horse; physiology; population density; veterinary medicine; Animals; Cattle; Conservation of Natural Resources; Deer; Diet; Ecosystem; Geese; Herbivo…	English	Article	Scopus
Density-dependent resource partitioning of temperate large herbivore populations under rewilding	2025	10.1002/eap.70090						PubMed
Design and testing of 'genome-proxy' microarrays to profile marine microbial communities	2008	10.1111/j.1462-2920.2007.01471.x	Microarrays are useful tools for detecting and quantifying specific functional and phylogenetic genes in natural microbial communities. In order to track uncultivated microbial genotypes and their close relatives in an environmental context, we designed and implemented a 'genome-proxy' microarray that targets microbial genome fragments recovered directly from the environment. Fragments consisted …	Dna Probes; Sea Water; Antarctica; Archaebacterium; Article; Bacterial Genome; Bacterium; Classification; Dna Microarray; Dna Probe; Dna Sequence; Ecosystem; Genetics; Genome; Isolation And Purification; Methodology; Microbiology; Molecular Genetics; Nucleotide Sequence; Prochlorococcus; Sensitivity And Specificity; United States; Antarctic Regions; Archaea; Bacteria; Dna Probes; Ecosystem; Genom…	sea water; Antarctica; Archaebacterium; article; bacterial genome; bacterium; classification; DNA microarray; DNA probe; DNA sequence; ecosystem; genetics; genome; isolation and purification; methodology; microbiology; molecular genetics; nucleotide sequence; Prochlorococcus; sensitivity and specificity; United States; Antarctic Regions; Archaea; Bacteria; DNA Probes; Ecosystem; Genome, Archaeal;…	English	Article	Scopus
Design and testing of 'genome-proxy' microarrays to profile marine microbial communities	2008	10.1111/j.1462-2920.2007.01471.x	Microarrays are useful tools for detecting and quantifying specific functional and phylogenetic genes in natural microbial communities. In order to track uncultivated microbial genotypes and their close relatives in an environmental context, we designed and implemented a 'genome-proxy' microarray that targets microbial genome fragments recovered directly from the environment. Fragments consisted …		16S RIBOSOMAL-RNA; OLIGONUCLEOTIDE MICROARRAY; PROCHLOROCOCCUS ECOTYPES; DIVERSITY; GENES; POPULATIONS; ECOLOGY; HYBRIDIZATION; PROKARYOTES; SEQUENCES	English	Article	Web of Science
Design and testing of 'genome-proxy' microarrays to profile marine microbial communities	2008	10.1111/j.1462-2920.2007.01471.x						PubMed
Detecting and analysing intraspecific genetic variation with eDNA: From population genetics to species abundance	2023	10.1111/mec.17031	Advancements in environmental DNA (eDNA) approaches have allowed for rapid and efficient species detections in diverse environments. Although most eDNA research is focused on leveraging genetic diversity to identify taxa, some recent studies have explored the potential for these approaches to detect within-species genetic variation, allowing for population genetic assessments and abundance estima…	Abundance; Biodiversity; Dna Mixtures; Environmental Dna; Metabarcoding; Dna, Environmental; Environmental Dna; Biodiversity; Dna Barcoding; Environmental Monitoring; Genetic Variation; Genetics; Population Genetics; Biodiversity; Dna Barcoding, Taxonomic; Dna, Environmental; Environmental Monitoring; Genetic Variation; Genetics, Population	environmental DNA; biodiversity; DNA barcoding; environmental monitoring; genetic variation; genetics; population genetics; Biodiversity; DNA Barcoding, Taxonomic; DNA, Environmental; Environmental Monitoring; Genetic Variation; Genetics, Population	English	Review	Scopus
Detecting and analysing intraspecific genetic variation with eDNA: From population genetics to species abundance	2023	10.1111/mec.17031	Advancements in environmental DNA (eDNA) approaches have allowed for rapid and efficient species detections in diverse environments. Although most eDNA research is focused on leveraging genetic diversity to identify taxa, some recent studies have explored the potential for these approaches to detect within-species genetic variation, allowing for population genetic assessments and abundance estima…	abundance; biodiversity; DNA mixtures; environmental DNA; metabarcoding	ENVIRONMENTAL DNA; NUMBER; CONTRIBUTORS; SAMPLES; BIODIVERSITY; OCCUPANCY; INFERENCE; EVOLUTION; INVASION; MIXTURES	English	Review	Web of Science
Detecting and analysing intraspecific genetic variation with eDNA: From population genetics to species abundance	2023	10.1111/mec.17031						PubMed
Detection and characterisation of the biopollutant Xenostrobus securis (Lamarck 1819) Asturian population from DNA Barcoding and eBarcoding	2016	10.1016/j.marpolbul.2016.03.008	DNA efficiently contributes to detect and understand marine invasions. In 2014 the potential biological pollutant pygmy mussel (Xenostrobus securis) was observed for the first time in the Avilés estuary (Asturias, Bay of Biscay). The goal of this study was to assess the stage of invasion, based on demographic and genetic (DNA Barcoding) characteristics, and to develop a molecular tool for surveyi…	Barcoding; Bay Of Biscay; Biological Invasion; Environmental Dna; Phylogenetic Expansion Signals; Xenostrobus Securis; Cytochrome C Oxidase; Dna Primers; Electron Transport Complex Iv; Bar Codes; Dna; Expansion; Genes; Molluscs; Barcoding; Bay Of Biscay; Bimodal Size Distribution; Biological Invasion; Cytochrome Oxidase I; Population Structures; Species-specific Primers; Xenostrobus Securis; Poly…	Bar codes; DNA; Expansion; Genes; Molluscs; Barcoding; Bay of Biscay; Bimodal size distribution; Biological invasion; Cytochrome oxidase I; Population structures; Species-specific primers; Xenostrobus securis; Polymerase chain reaction; biological invasion; bivalve; genetic variation; phylogenetics; pollutant; population structure; toxic organism; Article; cohort analysis; correlational study; cy…	English	Article	Scopus
Detection and characterisation of the biopollutant Xenostrobus securis (Lamarck 1819) Asturian population from DNA Barcoding and eBarcoding	2016	10.1016/j.marpolbul.2016.03.008	DNA efficiently contributes to detect and understand marine invasions. In 2014 the potential biological pollutant pygmy mussel (Xenostrobus securis) was observed for the first time in the Aviles estuary (Asturias, Bay of Biscay). The goal of this study was to assess the stage of invasion, based on demographic and genetic (DNA Barcoding) characteristics, and to develop a molecular tool for surveyi…	Xenostrobus securis; biological invasion; environmental DNA; Barcoding; phylogenetic expansion signals; Bay of Biscay	MYTILUS-GALLOPROVINCIALIS; METABARCODING APPROACH; BIVALVIA MYTILIDAE; GENETIC DIVERSITY; 1ST RECORD; MARINE; MOLLUSCA; HISTORY; SURVEILLANCE; INVASION	English	Article	Web of Science
Detection and characterisation of the biopollutant Xenostrobus securis (Lamarck 1819) Asturian population from DNA Barcoding and eBarcoding	2016	10.1016/j.marpolbul.2016.03.008						PubMed
Detection and population genomics of sea turtle species via noninvasive environmental DNA analysis of nesting beach sand tracks and oceanic water	2022	10.1111/1755-0998.13617	Elusive aquatic wildlife, such as endangered sea turtles, are difficult to monitor and conserve. As novel molecular and genetic technologies develop, it is possible to adapt and optimize them for wildlife conservation. One such technology is environmental (e)DNA – the detection of DNA shed from organisms into their surrounding environments. We developed species-specific green (Chelonia mydas) and…	Chhv5; Endangered Species; Environmental Dna (edna); Pathogens; Population Genetics/genomics; Population Monitoring; Sea Turtles		English	Article	Scopus
Detection and population genomics of sea turtle species via noninvasive environmental DNA analysis of nesting beach sand tracks and oceanic water	2022	10.1111/1755-0998.13617	Elusive aquatic wildlife, such as endangered sea turtles, are difficult to monitor and conserve. As novel molecular and genetic technologies develop, it is possible to adapt and optimize them for wildlife conservation. One such technology is environmental (e)DNA - the detection of DNA shed from organisms into their surrounding environments. We developed species-specific green (Chelonia mydas) and…	ChHV5; endangered species; environmental DNA (eDNA); pathogens; population genetics; genomics; population monitoring; sea turtles	GLOBAL PHYLOGEOGRAPHY; STOCK STRUCTURE; CHELONIA-MYDAS; EDNA; MARINE; FIBROPAPILLOMATOSIS; HISTORY; PERSISTENCE; HERPESVIRUS; SEQUENCES	English	Article	Web of Science
Detection and population genomics of sea turtle species via noninvasive environmental DNA analysis of nesting beach sand tracks and oceanic water	2022	10.1111/1755-0998.13617						PubMed
Detection and quantification of Fusarium oxysporum f. sp cucumerinum in environmental samples using a specific quantitative PCR assay	2013	10.1007/s10658-013-0244-1	The rapid and reliable identification and quantification of pathogens is essential for the management of economically important plant diseases. Fusarium oxysporum f. sp. cucumerinum is the soil borne fungus responsible for Fusarium vascular wilt of cucumber. In this study, we report the development of a specific and reliable real-time quantitative PCR assay and the development of an ultra-sensiti…	Fusarium wilt; Epidemiology; Real-time PCR	POLYMERASE-CHAIN-REACTION; SP RADICIS-CUCUMERINUM; VEGETATIVE COMPATIBILITY; BIOLOGICAL-CONTROL; GENETIC DIVERSITY; WILT; CUCUMBER; FUNGUS; SOIL; PATHOGENICITY	English	Article	Web of Science
Detection and quantitative possibility of firefly larvae（Luciola cruciata）using environmental DNA analysis; 環境 DNA 分析によるゲンジボタル幼虫の検出と定量可能性	2020	10.3825/ECE.20-00026	The Genji firefly（Luciola cruciata）is an important tourism resource, especially in Japan. Nevertheless, its habitat has decreased, mainly due to human activity. Until now, its population size has been studied primarily by visual observation of adults, which fly and flash during the night. Surveys of larvae have been avoided not to disturb its populations and habitats. In this study, we performed …	Aquatic Insect; Environmental Dna; Genji Firefly; Primer‒prove Set; Quantitative Pcr; Bioluminescence; Ecosystems; Polymerase Chain Reaction; Population Statistics; Probes; Aquatic Insects; Dna Analysis; Environmental Dna; Genji Firefly; Larval Stage; Measurements Of; Primer Sets; Primer‒prove Set; Quantitative Pcr; Repeated Measurements; Dna	Bioluminescence; Ecosystems; Polymerase chain reaction; Population statistics; Probes; Aquatic insects; DNA analysis; Environmental DNA; Genji firefly; Larval stage; Measurements of; Primer sets; Primer‒prove set; Quantitative PCR; Repeated measurements; DNA	Japanese	Article	Scopus
Detection differences between eDNA and mid-water trawls are driven by fish biomass and habitat preferences	2024	10.1002/edn3.586	Marine scientific trawl surveys are commonly used to assess the distribution and population size of fisheries-related species, yet the method is effort-intensive and can be environmentally destructive. Sequencing environmental DNA (eDNA) from water samples can reveal the presence of organisms in a community without capturing them; however, we expect the detectability of taxa to differ between eDN…	Community Similarity; Environmental Dna; Marine Fisheries; Metabarcoding; Species Detection; Trawl Surveys		English	Article	Scopus
Detection differences between eDNA and mid-water trawls are driven by fish biomass and habitat preferences	2024	10.1002/edn3.586	Marine scientific trawl surveys are commonly used to assess the distribution and population size of fisheries-related species, yet the method is effort-intensive and can be environmentally destructive. Sequencing environmental DNA (eDNA) from water samples can reveal the presence of organisms in a community without capturing them; however, we expect the detectability of taxa to differ between eDN…	community similarity; environmental DNA; marine fisheries; metabarcoding; species detection; trawl surveys	BIODIVERSITY; ABUNDANCE; ECOSYSTEM; DYNAMICS; LENGTH	English	Article	Web of Science
Detection of colorectal cancer k-ras mutations using a simplified oligonucleotide ligation assay	1997	10.1016/S0022-1759(97)00078-1	It has been suggested that some mutations in codons 12 and 13 of the K- ras gene are associated with the progression of colorectal adenomas to carcinomas. The aim of this study was to develop a rapid, colorimetric assay for K-ras point mutations commonly associated with colorectal cancer. K-ras exon 1 was amplified from colorectal tumor DNA and K-ras activating mutations detected using an oligonu…	Amplification; Dipstick; K-ras; Oligonucleotide Ligation Assay; Screen; Oligonucleotide Probes; Ras Proteins; Article; Cancer Diagnosis; Colon Carcinogenesis; Colorectal Cancer; Female; Gene Mutation; Human; Human Tissue; Male; Oncogene K Ras; Point Mutation; Priority Journal; Adenocarcinoma; Adenoma; Alleles; Colorectal Neoplasms; Colorimetry; Enzyme-linked Immunosorbent Assay; Female; Gene Ampl…	article; cancer diagnosis; colon carcinogenesis; colorectal cancer; female; gene mutation; human; human tissue; male; oncogene k ras; point mutation; priority journal; Adenocarcinoma; Adenoma; Alleles; Colorectal Neoplasms; Colorimetry; Enzyme-Linked Immunosorbent Assay; Female; Gene Amplification; Genes, ras; Genetic Screening; Humans; Male; Oligonucleotide Probes; Point Mutation; ras Proteins; …	English	Article	Scopus
Detection of colorectal cancer K-ras mutations using a simplified oligonucleotide ligation assay	1997	10.1016/S0022-1759(97)00078-1	It has been suggested that some mutations in codons 12 and 13 of the K-ras gene are associated with the progression of colorectal adenomas to carcinomas. The aim of this study was to develop a rapid, colorimetric assay for K-ras point mutations commonly associated with colorectal cancer. K-ras exon 1 was amplified from colorectal tumor DNA and K-ras activating mutations detected using an oligonuc…	K-ras; oligonucleotide ligation assay; screen; dipstick; amplification	AMPLIFICATION MASA; ONCOGENE MUTATIONS; DETAILED ANALYSIS; GENE; DNA; IDENTIFICATION; TUMORS; PCR; ADENOCARCINOMA; PROGRESSION	English	Article	Web of Science
Detection of colorectal cancer K-ras mutations using a simplified oligonucleotide ligation assay	1997	10.1016/s0022-1759(97)00078-1						PubMed
Detection of critically endangered marine species with dwindling populations in the wild using eDNA gives hope for sawfishes	2021	10.1007/s00227-021-03862-7	The detection of threatened species, specially where they have been depleted, is key to their conservation but poses severe logistical challenges precisely because of their very low abundances. Sawfishes (family Pristidae) are among the most threatened marine taxa with globally-reported severe reductions in population size and disappearance from large parts of their former distribution range. Thi…	Abundance Index; Conservation Status; Detection Method; Dna; Endangered Species; Fish; Population Size; Relative Abundance; Mexico [north America]; Tecolutla River; Laguna; Pristidae	abundance index; conservation status; detection method; DNA; endangered species; fish; population size; relative abundance; Mexico [North America]; Tecolutla River; Laguna; Pristidae	English	Article	Scopus
Detection of critically endangered marine species with dwindling populations in the wild using eDNA gives hope for sawfishes	2021	10.1007/s00227-021-03862-7	The detection of threatened species, specially where they have been depleted, is key to their conservation but poses severe logistical challenges precisely because of their very low abundances. Sawfishes (family Pristidae) are among the most threatened marine taxa with globally-reported severe reductions in population size and disappearance from large parts of their former distribution range. Thi…		ENVIRONMENTAL DNA; SMALLTOOTH SAWFISH; PRISTIS-PECTINATA; FISH; BIODIVERSITY; PERSISTENCE; DEGRADATION; VARIABILITY; DISPERSION; DIVERSITY	English	Article	Web of Science
Determination of polar bear (Ursus maritimus) individual genotype and sex based on DNA extracted from paw-prints in snow	2023	10.3389/fcosc.2023.1166279	Polar bears rely upon sea ice to hunt, travel, and reproduce. Declining sea ice extent and duration has led polar bears to be designated as “threatened” (ESA). Population monitoring is vital to polar bear conservation; but recently, poor sea ice has made traditional aircraft-based methods less viable. These methods largely rely upon the capture and handling of polar bears, and have been criticize…	Alaska (usa); Arctic Research; Environmental Dna; Genetic Sampling; Microsatellites; Population Biology; Wildlife Management		English	Article	Scopus
Determination of polar bear (Ursus maritimus) individual genotype and sex based on DNA extracted from paw-prints in snow	2023	10.3389/fcosc.2023.1166279	Polar bears rely upon sea ice to hunt, travel, and reproduce. Declining sea ice extent and duration has led polar bears to be designated as threatened (ESA). Population monitoring is vital to polar bear conservation; but recently, poor sea ice has made traditional aircraft-based methods less viable. These methods largely rely upon the capture and handling of polar bears, and have been criticized …	environmental DNA; population biology; genetic sampling; microsatellites; wildlife management; arctic research; Alaska (USA)	IDENTIFICATION; TRACKS; ASSAY; COST	English	Article	Web of Science
Developing a DNA metabarcoding method to identify diet taxa in Neotropical foxes	2024	10.3389/fevo.2024.1360714	Pampas and crab-eating foxes are medium-sized canids living in sympatry in the middle east of South America. Studies on the diet composition of these species provide a deep understanding of their ecological roles in the ecosystem structure and regulation. Using the metabarcoding technique, we analyzed the diet of both fox species in order to identify the vertebrate taxa included as food items. A …	Environmental Dna; High-throughput Sequencing (hts); Molecular Ecology; Non-invasive Genetic Techniques; Wild Canids		English	Article	Scopus
Developing a DNA metabarcoding method to identify diet taxa in Neotropical foxes	2024	10.3389/fevo.2024.1360714	Pampas and crab-eating foxes are medium-sized canids living in sympatry in the middle east of South America. Studies on the diet composition of these species provide a deep understanding of their ecological roles in the ecosystem structure and regulation. Using the metabarcoding technique, we analyzed the diet of both fox species in order to identify the vertebrate taxa included as food items. A …	non-invasive genetic techniques; high-throughput sequencing (HTS); molecular ecology; environmental DNA; wild canids	PSEUDALOPEX-GYMNOCERCUS; GENERATION	English	Article	Web of Science
Developing a monitoring program of genetic diversity: what do stakeholders say?	2021	10.1007/s10592-021-01379-6	Genetic diversity is a fundamental component of biological diversity, and its conservation is considered key to ensure the long-term survival of natural populations and species. National and international legislation increasingly mandates a monitoring of genetic diversity. Examples are the United Nation's Convention on Biological Diversity (CBD) Aichi target 13 and the current post-2020 negotiati…	Conservation genetics; Genetic diversity; International obligations; Monitoring; Stakeholder analysis	ENVIRONMENTAL DNA; CONSERVATION; BIODIVERSITY; CLIMATE; POPULATIONS; MANAGEMENT; GENOMICS; BIOLOGY; HISTORY; PLANT	English	Article	Web of Science
Development and application of environmental DNA surveillance for the threatened crucian carp (Carassius carassius)	2019	10.1111/fwb.13197	The crucian carp (Carassius carassius) is one of few fish species associated with small ponds in the UK. These populations contain genetic diversity not found in Europe and are important to conservation efforts for the species which has declined across its range in Europe. Detection and monitoring of extant crucian carp populations are crucial for conservation success. Environmental DNA (eDNA) an…	Crucian Carp; Detection Probability; Environmental Dna; Ponds; Quantitative Polymerase Chain Reaction (qpcr)		English	Article	Scopus
Development and application of environmental DNA surveillance for the threatened crucian carp (Carassius carassius)	2019	10.1111/fwb.13197	The crucian carp (Carassius carassius) is one of few fish species associated with small ponds in the UK. These populations contain genetic diversity not found in Europe and are important to conservation efforts for the species which has declined across its range in Europe. Detection and monitoring of extant crucian carp populations are crucial for conservation success. Environmental DNA (eDNA) an…	crucian carp; detection probability; environmental DNA; ponds; quantitative polymerase chain reaction (qPCR)	FISH; EDNA; CONSERVATION; DEGRADATION; COMMUNITIES; POPULATION; MANAGEMENT; CAPTURE; POND; SIZE	English	Article	Web of Science
Development and Validation of an Environmental DNA Method for Detection of the Alligator Snapping Turtle (Macrochelys temminckii)	2018	10.2744/CCB-1315.1	The alligator snapping turtle (Macrochelys temminckii) is under consideration for listing as a federally endangered species. Distributional data and estimates of population sizes are needed to make a sound decision regarding listing, but this information is largely unavailable due to the immense effort required for M. temminckii trapping surveys. To alleviate difficulty in detection and to help i…	Conservation; Filter; Lotic; River; Survey; Turbid		English	Review	Scopus
Development and validation of an environmental DNA test for the endangered Gouldian finch	2019	10.3354/ESR00987	Detecting animals by identifying their DNA in water is a valuable tool for locating and monitoring species that are difficult to detect through other survey techniques. We developed a test for detecting the endangered Gouldian finch Erythrura gouldiae, a small bird endemic to northern Australia. Only 1 previous study has reported an environmental DNA (eDNA) test that unequivocally identifies a bi…	Birds; Distribution; Edna; Erythrura Gouldiae; Filter; Gouldian Finch; Qpcr; Water; Detection Method; Dna; Endangered Species; Experimental Study; Gene Expression; Model Validation; Passerine; Population Genetics; Species Conservation; Australia; Animalia; Aves; Erythrura Gouldiae; Fringillidae	detection method; DNA; endangered species; experimental study; gene expression; model validation; passerine; population genetics; species conservation; Australia; Animalia; Aves; Erythrura gouldiae; Fringillidae	English	Article	Scopus
Development of a cultivation-independent approach for the study of genetic diversity of Sinorhizobium meliloti populations	2010	10.1111/j.1755-0998.2009.02697.x	The development of a species-specific marker for the analysis of the genetic polymorphism of the nitrogen-fixing symbiotic bacterium Sinorhizobium meliloti directly from environmental DNA is reported. The marker is based on terminal-restriction fragment length polymorphism (T-RFLP) methodology targeting specifically the 16S-23S Ribosomal Intergenic Spacer of S. meliloti. Species-specificity and p…	Bacterial Population; Igs; Sinorhizobium Meliloti; T-rflp; Bacteria (microorganisms); Sinorhizobium Meliloti	Bacteria (microorganisms); Sinorhizobium meliloti	English	Article	Scopus
Development of a cultivation-independent approach for the study of genetic diversity of Sinorhizobium meliloti populations	2010	10.1111/j.1755-0998.2009.02697.x	The development of a species-specific marker for the analysis of the genetic polymorphism of the nitrogen-fixing symbiotic bacterium Sinorhizobium meliloti directly from environmental DNA is reported. The marker is based on terminal-restriction fragment length polymorphism (T-RFLP) methodology targeting specifically the 16S-23S Ribosomal Intergenic Spacer of S. meliloti. Species-specificity and p…	bacterial population; IGS; Sinorhizobium meliloti; T-RFLP	ALFALFA MEDICAGO-SATIVA; RHIZOBIUM-MELILOTI; T-RFLP; SOIL; NODULES	English	Article	Web of Science
Development of a cultivation-independent approach for the study of genetic diversity of Sinorhizobium meliloti populations	2010	10.1111/j.1755-0998.2009.02697.x						PubMed
Development of a sedimentary DNA detection assay for the invasive moon snail Laguncula pulchella preferentially preying on the Manila clam Ruditapes philippinarum	2025	10.1016/j.ecss.2025.109443	The moon snail Laguncula pulchella, native to China and the Korean Peninsula, has invaded Japan alongside the imported Manila clam Ruditapes philippinarum and is expanding its distribution. This species preferentially feeds on live R. philippinarum. Recently, the nationwide yield of Manila clams in Japan has declined significantly. Although the primary cause of this decline remains unclear, preda…	Alien Species; Clam-eating Moon Snail; Laguncula Pulchella; Presence Or Absence; Sedimentary Dna; Assay; Dna; Introduced Species; Mucus; Phylogeny; Predation; Snail; China; Japan; Korea; Manila; National Capital Region; Philippines	assay; DNA; introduced species; mucus; phylogeny; predation; snail; China; Japan; Korea; Manila; National Capital Region; Philippines	English	Article	Scopus
Development of a sedimentary DNA detection assay for the invasive moon snail Laguncula pulchella preferentially preying on the Manila clam Ruditapes philippinarum	2025	10.1016/j.ecss.2025.109443	The moon snail Laguncula pulchella, native to China and the Korean Peninsula, has invaded Japan alongside the imported Manila clam Ruditapes philippinarum and is expanding its distribution. This species preferentially feeds on live R. philippinarum. Recently, the nationwide yield of Manila clams in Japan has declined significantly. Although the primary cause of this decline remains unclear, preda…	Alien species; Clam-eating moon snail; Laguncula pulchella; Presence or absence; Sedimentary DNA	ENVIRONMENTAL DNA; EUSPIRA-FORTUNEI; JAPAN; QUANTIFICATION; SELECTIVITY; POPULATION; RATES; SIZE	English	Article	Web of Science
Development of an eDNA metabarcoding tool for surveying the world’s largest amphibian	2022	10.1093/cz/zoab094	Due to the overexploitation of farming, as well as habitat destruction, the wild population of Chinese giant salamander (CGS) Andrias davidianus, a species with seven genetically distinct lineages, has decreased by over 80% in the past 70 years. Traditional survey methods have proven to be unsuitable for finding this rare and elusive species. We evaluated the efficacy of environmental DNA (eDNA) …	Andrias Davidianus; Chinese Giant Salamander; Edna; Metabarcoding; Population Survey		English	Article	Scopus
Development of an eDNA metabarcoding tool for surveying the world's largest amphibian	2022	10.1093/cz/zoab094	Due to the overexploitation of farming, as well as habitat destruction, the wild population of Chinese giant salamander (CGS) Andrias davidianus, a species with seven genetically distinct lineages, has decreased by over 80% in the past 70 years. Traditional survey methods have proven to be unsuitable for finding this rare and elusive species. We evaluated the efficacy of environmental DNA (eDNA) …	Andrias davidianus; Chinese giant salamander; eDNA; metabarcoding; population survey	CHINESE GIANT SALAMANDER; ENVIRONMENTAL DNA METHODS; ANDRIAS-DAVIDIANUS; READ ALIGNMENT; EXTINCTION; CONSERVATION; RATES; WILD	English	Article	Web of Science
Development of an eDNA metabarcoding tool for surveying the world's largest amphibian	2021	10.1093/cz/zoab094						PubMed
Development of an environmental DNA assay for detecting multiple shark species involved in human–shark conflicts in Australia	2021	10.1002/edn3.202	The number of human–shark interactions has increased worldwide during the past decade resulting in injuries and fatalities. In Australia, the white shark (Carcharodon carcharias), tiger shark (Galeocerdo cuvier), and bull shark (Carcharhinus leucas) are responsible for the majority of fatal incidents. On the southeast coast of Australia, monitoring programs currently rely on SMART (Shark-Manageme…	Bull Shark; Edna; Environmental Dna; Multispecies Assay; Tiger Shark; White Shark		English	Article	Scopus
Development of novel PCR primer sets for DNA barcoding of aquatic insects, and the discovery of some cryptic species	2023	10.1007/s10201-022-00710-5	DNA barcoding is a powerful tool that provides rapid, accurate, and automatable species identification using standardized genetic region(s), such as for revealing the existence of cryptic species and/or rare species in biodiversity monitoring. DNA barcoding techniques require the development of sets of universal PCR primers for DNA barcoding. We tried to develop universal primer sets, and succeed…	12s Rrna; 16s Rrna; Biodiversity; Dna Barcoding; Edna; Amplification; Biodiversity; Dna; Genetic Variation; Insect; Rna	amplification; biodiversity; DNA; genetic variation; insect; RNA	English	Article	Scopus
Development of novel PCR primer sets for DNA barcoding of aquatic insects, and the discovery of some cryptic species	2023	10.1007/s10201-022-00710-5	DNA barcoding is a powerful tool that provides rapid, accurate, and automatable species identification using standardized genetic region(s), such as for revealing the existence of cryptic species and/or rare species in biodiversity monitoring. DNA barcoding techniques require the development of sets of universal PCR primers for DNA barcoding. We tried to develop universal primer sets, and succeed…	Biodiversity; DNA barcoding; eDNA; 12S rRNA; 16S rRNA	ENVIRONMENTAL DNA; DIVERSIFICATION; EPHEMEROPTERA; MITOCHONDRIAL; CHOICE; MODEL; JAPAN	English	Article	Web of Science
Development of universal PCR primers for the environmental DNA metabarcoding of cephalopod (Mollusca) diversity	2025	10.1016/j.marenvres.2025.107094	Cephalopods play crucial roles in marine ecosystems, acting as both predators and prey for apex predators, thereby contributing to the distribution of energy and nutrients across the food web. Traditional net capture methods are often ineffective for studying cephalopods owing to their wide distribution in marine environments, necessitating the development of simple and efficient surveying techni…	Environmental Dna Monitoring; Marine Invertebrates; Mitochondrial 16s Rrna Gene; Octopuses; Squids; Dna Primers; Dna, Environmental; Rna, Ribosomal, 16s; Agilent 2100 Bioanalyzer; Dneasy Blood And Tissue Kit; E-gel Precast Agarose Electrophoresis System; Illumina Iseq 100 System; Illumina Miseq V2 Reagent Kit; Mega7; Miseq; R V.3.6.0; Sterivex Cartridge; Usearch V10.0.240; Abiotic; Dna; Invertebr…	Abiotic; DNA; Invertebrates; Mitochondria; Molluscs; Polymerase chain reaction; RNA; 16S rRNA gene; Energy; Environmental DNA monitoring; Marine invertebrates; Mitochondrial 16s rRNA gene; Mollusca; Octopus; PCR primers; Primer sets; Squid; Shellfish; environmental DNA; genomic DNA; RNA 16S; primer DNA; body size; cephalopod; gene; marine ecosystem; marine environment; polymerase chain reaction; …	English	Article	Scopus
Development of universal PCR primers for the environmental DNA metabarcoding of cephalopod (Mollusca) diversity	2025	10.1016/j.marenvres.2025.107094	Cephalopods play crucial roles in marine ecosystems, acting as both predators and prey for apex predators, thereby contributing to the distribution of energy and nutrients across the food web. Traditional net capture methods are often ineffective for studying cephalopods owing to their wide distribution in marine environments, necessitating the development of simple and efficient surveying techni…	Environmental DNA monitoring; Marine invertebrates; Mitochondrial 16S rRNA gene; Squids; Octopuses	STHENOTEUTHIS-OUALANIENSIS; BIODIVERSITY; ECHINODERMATA; ENABLES; FISH	English	Article	Web of Science
Development of universal PCR primers for the environmental DNA metabarcoding of cephalopod (Mollusca) diversity	2025	10.1016/j.marenvres.2025.107094						PubMed
Differences in the genetic structure between and within two landlocked Ayu groups with different migration patterns in Lake Biwa revealed by environmental DNA analysis	2023	10.1002/edn3.345	Ayu (Plecoglossus altivelis) is largely an annual amphidromous fish, although a landlocked population lives in Lake Biwa, the largest lake in Japan. The landlocked population comprises two migrant groups, spring migrants and autumn migrants, which run to inlet rivers from the lake at different seasons. We used environmental DNA (eDNA) analysis, which is reported to be more sensitive and cost-effe…	Environmental Dna; Genetic Structure; Lake Biwa; Landlocked Ayu; Migration Pattern		English	Article	Scopus
Differences in the genetic structure between and within two landlocked Ayu groups with different migration patterns in Lake Biwa revealed by environmental DNA analysis	2023	10.1002/edn3.345	Ayu (Plecoglossus altivelis) is largely an annual amphidromous fish, although a landlocked population lives in Lake Biwa, the largest lake in Japan. The landlocked population comprises two migrant groups, spring migrants and autumn migrants, which run to inlet rivers from the lake at different seasons. We used environmental DNA (eDNA) analysis, which is reported to be more sensitive and cost-effe…	environmental DNA; genetic structure; Lake Biwa; landlocked Ayu; migration pattern	PLECOGLOSSUS-ALTIVELIS; WILD	English	Article	Web of Science
Digital Absolute Gene Expression Analysis of Essential Starch-Related Genes in a Radiation Developed Amaranthus cruentus L. Variety in Comparison with Real-Time PCR	2020	10.3390/plants9080966	We investigated the expression pattern of four major starch genes at different seed developmental stages in the radiation-bred amaranth variety Pribina (Amaranthus cruentusL.) and corresponding control genotype Ficha (Amaranthus cruentusL.). Two platforms were used and compared for the gene expression analysis ofGBSSI,SSSI,SBE, andDBEamaranth genes, including a standard quantitative real-time PCR…	grain amaranth; gamma radiation; starch synthesis genes; droplet digital PCR	MOLECULAR CHARACTERIZATION; ENVIRONMENTAL DNA; QUANTIFICATION; DIVERSITY; FAMILY	English	Article	Web of Science
Digital PCR: modern solution to parasite diagnostics and population trait genetics	2023	10.1186/s13071-023-05756-7	The use of polymerase chain reaction (PCR)-based diagnostic approaches has steadily increased in the field of parasitology in recent decades. The most recent large-scale technological modification of the PCR formula, also known as third-generation PCR, came in the form of digital PCR (dPCR). Currently, the most common form of dPCR on the market is digital droplet PCR (ddPCR). Unlike quantitative …	Ddpcr; Diagnosis; Edna; Parasite; Resistance; Dna; Dna; Nucleic Acid; Dna; Apicomplexa; Ascaridia; Babesia; Bartonella; Borrelia; Chilodonella Hexasticha; Controlled Study; Cooperia; Cytauxzoon Felis; Dirofilaria Immitis; Droplet Digital Polymerase Chain Reaction; Echinococcus Multilocularis; Eimeria; Fasciola; Genetic Variability; Gyrodactylidae; Gyrodactylis Salaris; Haemonchus; Haemonchus Cont…	nucleic acid; DNA; Apicomplexa; Ascaridia; Babesia; Bartonella; Borrelia; Chilodonella hexasticha; controlled study; Cooperia; Cytauxzoon felis; Dirofilaria immitis; droplet digital polymerase chain reaction; Echinococcus multilocularis; Eimeria; Fasciola; genetic variability; Gyrodactylidae; Gyrodactylis salaris; Haemonchus; Haemonchus contortus; Haemosporida; Heterakis; limit of quantitation; n…	English	Review	Scopus
Discovering hidden biodiversity: the use of complementary monitoring of fish diet based on DNA barcoding in freshwater ecosystems	2016	10.1002/ece3.1825	Ecological monitoring contributes to the understanding of complex ecosystem functions. The diets of fish reflect the surrounding environment and habitats and may, therefore, act as useful integrating indicators of environmental status. It is, however, often difficult to visually identify items in gut contents to species level due to digestion of soft-bodied prey beyond visual recognition, but new…	DNA barcoding; fish diet; monitoring tool; shallow lakes	ENVIRONMENTAL DNA; EXTRACTION; DIVERSITY	English	Article	Web of Science
Discovery of a bacterium, with distinctive dioxygenase, that is responsible for in situ biodegradation in contaminated sediment	2003	10.1073/pnas.1735529100	Microorganisms maintain the biosphere by catalyzing biogeochemical processes, including biodegradation of organic chemical pollutants. Yet seldom have the responsible agents and their respective genes been identified. Here we used field-based stable isotopic probing (SIP) to discover a group of bacteria responsible for in situ metabolism of an environmental pollutant, naphthalene. We released C-1…		COAL-TAR-WASTE; NAPHTHALENE DIOXYGENASE; MICROBIAL DIVERSITY; GENETIC DIVERSITY; RIBOSOMAL-RNA; MARINE; FIELD; TRICHODESMIUM; PSEUDOMONADS; OXIDATION	English	Article	Web of Science
Distinct seasonal migration patterns of Japanese native and non-native genotypes of common carp estimated by environmental DNA	2017	10.1002/ece3.3346	Understanding behavioral differences between intraspecific genotypes of aquatic animals is challenging because we cannot directly observe the animals underwater or visually distinguish morphologically similar counterparts. Here, we tested a new monitoring tool that uses environmental DNA (eDNA), an assemblage of DNA in environmental water, to specifically detect Japanese native and introduced non…	Animal Migration; Environmental Dna; Genotype; Single Nucleotide Polymorphism		English	Article	Scopus
Distinct seasonal migration patterns of Japanese native and non-native genotypes of common carp estimated by environmental DNA	2017	10.1002/ece3.3346	Understanding behavioral differences between intraspecific genotypes of aquatic animals is challenging because we cannot directly observe the animals underwater or visually distinguish morphologically similar counterparts. Here, we tested a new monitoring tool that uses environmental DNA (eDNA), an assemblage of DNA in environmental water, to specifically detect Japanese native and introduced non…	animal migration; environmental DNA; genotype; single nucleotide polymorphism	CYPRINUS-CARPIO; ANCIENT LINEAGE; LAKE BIWA; EDNA; BIODIVERSITY; CONSERVATION; INVASION; TOOL	English	Article	Web of Science
Distinct seasonal migration patterns of Japanese native and non-native genotypes of common carp estimated by environmental DNA	2017	10.1002/ece3.3346						PubMed
Distribution analysis of the finless porpoises (Neophocaena sp.) and oceanic dolphins (Delphinidae) in the Korean Sea using environmental DNA	2025	10.1371/journal.pone.0322148	Environmental DNA (eDNA) serves as a non-invasive tool for monitoring the presence of specific organisms in challenging or hard-to-access areas. We attempted non-invasive monitoring of Korean cetacean species by extracting eDNA from the western and southern seas of the Republic of Korea, as well as around Jeju Island. In the present study, we focused on two representative cetaceans of the Korean …	Dna, Environmental; Dna, Mitochondrial; Genejet Genomic Dna Purification Kit; Qiaquick Gel Extraction Kit; Step One Plus Real-time Pcr System; Genomic Dna; Environmental Dna; Microsatellite Dna; Mitochondrial Dna; Animal Experiment; Article; Autopsy; Cetacea; Controlled Study; Copy Number Variation; Delphinidae; Discriminant Analysis; Dna Extraction; Dna Fragmentation; Dna Sequence; Gel Electroph…	genomic DNA; environmental DNA; microsatellite DNA; mitochondrial DNA; animal experiment; Article; autopsy; Cetacea; controlled study; copy number variation; Delphinidae; discriminant analysis; DNA extraction; DNA fragmentation; DNA sequence; gel electrophoresis; gene sequence; genetic variability; geographic distribution; haplotype; island (geological); marine environment; microsatellite instabi…	English	Article	Scopus
Distribution analysis of the finless porpoises (Neophocaena sp.) and oceanic dolphins (Delphinidae) in the Korean Sea using environmental DNA	2025	10.1371/journal.pone.0322148	Environmental DNA (eDNA) serves as a non-invasive tool for monitoring the presence of specific organisms in challenging or hard-to-access areas. We attempted non-invasive monitoring of Korean cetacean species by extracting eDNA from the western and southern seas of the Republic of Korea, as well as around Jeju Island. In the present study, we focused on two representative cetaceans of the Korean …		TURSIOPS-ADUNCUS; JEJU ISLAND; GENETIC DIVERSITY; IDENTIFICATION; DEGRADATION; EVOLUTION; WHALES; WATERS; EDNA; TOOL	English	Article	Web of Science
Distribution of eukaryotic picoplankton assemblages across hydrographic fronts in the Southern Ocean, studied by denaturing gradient gel electrophoresis	2004		We used a molecular fingerprinting technique to analyze the distribution and composition of eukaryotic picoplankton along latitudinal transects in the Southern Ocean. First, primers specific for eukaryotic 18S rDNA were used in a polymerase chain reaction (PCR) with environmental DNA. The amplification products were subjected to denaturing gradient gel electrophoresis (DGGE). Transect DOVETAIL (4…		RIBOSOMAL-RNA; GENETIC DIVERSITY; SEA; BACTERIOPLANKTON; NANOPLANKTON; POPULATIONS; SEQUENCES; WATERS	English	Article	Web of Science
Distribution of the main apis mellifera mitochondrial dna lineages in italy assessed using an environmental dna approach	2021	10.3390/insects12070620	Growing interest has been emerging on the need to monitor the genetic integrity of the European Apis mellifera subspecies that could be threatened by the human-mediated dispersion of non-native populations and lines. Mitochondrial DNA (mtDNA) lineages can provide useful information for this purpose. In this study, we took advantage of the environmental DNA (eDNA) contained in the honey, which can…	Conservation Genetics; Edna; Honey; Italian Peninsula; Latitude; Mitotype; Mtdna; Population Genetics; Sicily		English	Article	Scopus
Distribution of the Main Apis mellifera Mitochondrial DNA Lineages in Italy Assessed Using an Environmental DNA Approach	2021	10.3390/insects12070620	Simple Summary The conservation of the genetic diversity of the native honey bee subspecies is a hot topic in many European countries. Mitochondrial DNA (mtDNA) analyses can provide some information that is useful to monitor the genetic integrity of Apis mellifera populations. A preliminary distribution of the main honey bee mitotypes in Italy was obtained more than 20 years ago. In this study we…	conservation genetics; eDNA; honey; Italian peninsula; latitude; mitotype; mtDNA; population genetics; Sicily	HONEY-BEE; MOLECULAR CHARACTERIZATION; PROTECTED POPULATIONS; EVOLUTIONARY HISTORY; GENETIC DIVERSITY; CLIMATE-CHANGE; INTROGRESSION; ORIGIN; BIODIVERSITY; IBERIENSIS	English	Article	Web of Science
Distribution of the Main Apis mellifera Mitochondrial DNA Lineages in Italy Assessed Using an Environmental DNA Approach	2021	10.3390/insects12070620						PubMed
Distribution of tiger salamanders in northern Sonora, Mexico: comparison of sampling methods and possible implications for an endangered subspecies	2021	10.1163/15685381-bja10072	Many aquatic species in the arid USA-Mexico borderlands region are imperiled, but limited information on distributions and threats often hinders management. To provide information on the distribution of the Western Tiger Salamander (Ambystoma mavortium), including the USA-federally endangered Sonoran Tiger Salamander (Ambystoma mavortium stebbinsi), we used traditional (seines, dip-nets) and mode…	Ajolote; Amphibian; Arizona; Endangered Species; Environmental Dna (edna); Hybridization; Invasive Species; Amphibian; Comparative Study; Conservation Management; Endangered Species; Hybridization; Invasive Species; Mitochondrial Dna; Sampling; Spatial Distribution; Subspecies; Arizona; Mexico [north America]; Sonora; United States	amphibian; comparative study; conservation management; endangered species; hybridization; invasive species; mitochondrial DNA; sampling; spatial distribution; subspecies; Arizona; Mexico [North America]; Sonora; United States	English	Article	Scopus
Distribution of tiger salamanders in northern Sonora, Mexico: comparison of sampling methods and possible implications for an endangered subspecies	2022	10.1163/15685381-bja10072	Many aquatic species in the arid USA-Mexico borderlands region are imperiled, but limited information on distributions and threats often hinders management. To provide information on the distribution of the Western Tiger Salamander (Ambystoma mavortium), including the USA-federally endangered Sonoran Tiger Salamander (Ambystoma mavortium stebbinsi), we used traditional (seines, dip-nets) and mode…	ajolote; amphibian; Arizona; endangered species; environmental DNA (eDNA); hybridization; invasive species	TIGRINUM-STEBBINSI LOWE; AMBYSTOMA-TIGRINUM; ENVIRONMENTAL DNA; WATER; FISH; FACILITATE; AMPHIBIA; FROGS	English	Article	Web of Science
Distribution, phylogeny, and growth of cold-adapted picoprasinophytes in arctic seas	2007	10.1111/j.1529-8817.2006.00310.x	Our pigment analyses from a year-long study in the coastal Beaufort Sea in the western Canadian Arctic showed the continuous prevalence of eukaryotic picoplankton in the green algal class Prasinophyceae. Microscopic analyses revealed that the most abundant photosynthetic cell types were Micromonas-like picoprasinophytes that persisted throughout winter darkness and then maintained steady exponent…	Arctic Ocean; Biogeography; Climate Change; Phytoplankton; Picoeukaryotes; Picoplankton; Pigments; Polar; Prasinophytes; Psychrophiles; Algae; Bathycoccus; Eukaryota; Mantoniella; Micromonas (green Alga); Prasinophyceae	algae; Bathycoccus; Eukaryota; Mantoniella; Micromonas (green alga); Prasinophyceae	English	Article	Scopus
Distribution, phylogeny, and growth of cold-adapted picoprasinophytes in arctic seas	2007	10.1111/j.1529-8817.2006.00310.x	Our pigment analyses from a year-long study in the coastal Beaufort Sea in the western Canadian Arctic showed the continuous prevalence of eukaryotic picoplankton in the green algal class Prasinophyceae. Microscopic analyses revealed that the most abundant photosynthetic cell types were Micromonas-like picoprasinophytes that persisted throughout winter darkness and then maintained steady exponent…	Arctic Ocean; biogeography; climate change; phytoplankton; picoeukaryotes; picoplankton; pigments; polar; prasinophytes; psychrophiles	MICROMONAS-PUSILLA PRASINOPHYCEAE; EUKARYOTIC PICOPLANKTON; WATER POLYNYA; OCEAN; PHYTOPLANKTON; DIVERSITY; PROCHLOROCOCCUS; ABUNDANCE; PHOTOSYNTHESIS; SYNECHOCOCCUS	English	Article	Web of Science
Diverse Applications of Environmental DNA Methods in Parasitology	2015	10.1016/j.pt.2015.06.013	Nucleic acid extraction and sequencing of genes from organisms within environmental samples encompasses a variety of techniques collectively referred to as environmental DNA or 'eDNA'. The key advantages of eDNA analysis include the detection of cryptic or otherwise elusive organisms, large-scale sampling with fewer biases than specimen-based methods, and generation of data for molecular systemat…		BLASTOCYSTIS SUBTYPES; MICROBIAL EUKARYOTES; METAGENOMIC ANALYSIS; MOLECULAR DIVERSITY; PLANKTON DIVERSITY; GENETIC DIVERSITY; IDENTIFICATION; BIODIVERSITY; HEALTH; AMPLIFICATION	English	Review	Web of Science
Diversity and distribution of Symbiodiniaceae detected on coral reefs of Lombok, Indonesia using environmental DNA metabarcoding	2022	10.7717/peerj.14006	Background. Dinoflagellates of family Symbiodiniaceae are important to coral reef ecosystems because of their contribution to coral health and growth; however, only a few studies have investigated the function and distribution of Symbiodiniaceae in Indonesia. Understanding the distribution of different kinds of Symbiodiniaceae can improve forecasting of future responses of various coral reef syst…	Coral triangle; Coral hosts; Endosymbiotic dinoflagellate; Aquatic plankton; Benthic periphyton; Next generation biomonitoring	FREE-LIVING SYMBIODINIUM; DINOFLAGELLATE SYMBIONTS; GENETIC DIVERSITY; INDO-PACIFIC; ZOOXANTHELLAE; SPP.; ENDOSYMBIONTS; SPECIFICITY; DINOPHYCEAE; TEMPERATURE	English	Article	Web of Science
Diversity at low abundance: The phenomenon of the rare bacterial biosphere	2016	10.1134/S0026261716030139	Rare bacterial biosphere (RBB) is a large and probably predominant sector of bacterial diversity, which is specifically represented by small populations. Although some RBB components have been characterized phenotypically (actualistic objects), it has been mainly described as a set of virtual objects, i.e., of the 16S rRNA gene sequences from environmental DNA samples, which are grouped into phyl…	Bacterial Diversity; Endemic; Environmental Dna; High-throughput 16s Rrna Gene Sequencing; Metagenomics; Operational Taxonomic Unit; Phylotype; The Rare Bacterial Biosphere		English	Review	Scopus
Diversity at low abundance: The phenomenon of the rare bacterial biosphere	2016	10.1134/S0026261716030139	Rare bacterial biosphere (RBB) is a large and probably predominant sector of bacterial diversity, which is specifically represented by small populations. Although some RBB components have been characterized phenotypically (actualistic objects), it has been mainly described as a set of virtual objects, i.e., of the 16S rRNA gene sequences from environmental DNA samples, which are grouped into phyl…	bacterial diversity; the rare bacterial biosphere; environmental DNA; high-throughput 16S rRNA gene sequencing; metagenomics; phylotype; operational taxonomic unit; endemic	THERMOPHILIC BACTERIA; MICROBIAL DIVERSITY; VIBRIO-FISCHERI; COMMUNITIES; MEMBERS; SURFACE; TAXA; CONTRIBUTES; SPECIFICITY; GENERATION	English	Review	Web of Science
Diversity of antibiotic resistance genes and mobile genetic elements of Sof Umer Cave microbiomes, Ethiopia	2025	10.1186/s12863-025-01334-1	Antibiotic resistance is a major global health concern that caused by the overuse and misuse of antibiotics. Mobile genetic elements have a roles in the transmission of antibiotic resistance genes. The distribution and diversity of antibiotic resistance genes and mobile genetic elements in the microbiome of Sof Umer Cave have yet to be explored. To map the distribution and diversity of antibiotic…	Antibiotic Resistance Genes; Microbiome Of Sof Umer Cave; Mobile Genetic Elements; Plasmids; Transposons; Anti-bacterial Agents; Environmental Dna; Virulence Factor; Antiinfective Agent; Acinetobacter Baumannii; Adef Gene; Antibiotic Resistance; Antibiotic Resistance Gene; Article; Bacterial Gene; Controlled Study; Dna Extraction; Dna Purification; Dna Sequencing; Erwinia Amylovora; Ethiopia; Gen…	environmental DNA; virulence factor; antiinfective agent; Acinetobacter baumannii; adeF gene; antibiotic resistance; antibiotic resistance gene; Article; bacterial gene; controlled study; DNA extraction; DNA purification; DNA sequencing; Erwinia amylovora; Ethiopia; genetic variability; high throughput sequencing; high throughput shotgun sequencing; host pathogen interaction; microbiome; mobile g…	English	Article	Scopus
Diversity of antibiotic resistance genes and mobile genetic elements of Sof Umer Cave microbiomes, Ethiopia	2025	10.1186/s12863-025-01334-1	Antibiotic resistance is a major global health concern that caused by the overuse and misuse of antibiotics. Mobile genetic elements have a roles in the transmission of antibiotic resistance genes. The distribution and diversity of antibiotic resistance genes and mobile genetic elements in the microbiome of Sof Umer Cave have yet to be explored. To map the distribution and diversity of antibiotic…	Antibiotic resistance genes; Microbiome of Sof Umer cave; Mobile genetic elements; Plasmids; Transposons	BACTERIAL DIVERSITY	English	Article	Web of Science
Diversity of antibiotic resistance genes and mobile genetic elements of Sof Umer Cave microbiomes, Ethiopia	2025	10.1186/s12863-025-01334-1						PubMed
Diversity of dinoflagellate assemblages in coastal temperate and offshore tropical waters of Australia	2021	10.1186/s12862-021-01745-5	Background: Dinoflagellates are a ubiquitous and ecologically important component of marine phytoplankton communities, with particularly notable species including those associated with harmful algal blooms (HABs) and those that bioluminesce. High-throughput sequencing offers a novel approach compared to traditional microscopy for determining species assemblages and distributions of dinoflagellate…	Bioluminescence; Dinoflagellates; Edna; Genotyping; Harmful Algal Bloom; High Throughput Sequencing; Algal Bloom; Bioluminescence; Dinoflagellate; Dna; Gene Expression; Molecular Analysis; Offshoring; Physiological Response; Taxonomy; Tropical Environment; Australia; Coral Sea; Davies Reef; Great Barrier Reef; Port Phillip Bay; Queensland; Victoria [australia]; Dinophyceae; Gymnodiniales; Gyrodin…	algal bloom; bioluminescence; dinoflagellate; DNA; gene expression; molecular analysis; offshoring; physiological response; taxonomy; tropical environment; Australia; Coral Sea; Davies Reef; Great Barrier Reef; Port Phillip Bay; Queensland; Victoria [Australia]; Dinophyceae; Gymnodiniales; Gyrodinium; Protoperidinium; phytoplankton; salinity; Dinoflagellida; Harmful Algal Bloom; Phytoplankton; Sa…	English	Article	Scopus
Diversity of dinoflagellate assemblages in coastal temperate and offshore tropical waters of Australia	2021	10.1186/s12862-021-01745-5	BackgroundDinoflagellates are a ubiquitous and ecologically important component of marine phytoplankton communities, with particularly notable species including those associated with harmful algal blooms (HABs) and those that bioluminesce. High-throughput sequencing offers a novel approach compared to traditional microscopy for determining species assemblages and distributions of dinoflagellates,…	Bioluminescence; Dinoflagellates; eDNA; Genotyping; Harmful algal bloom; High throughput sequencing	HARMFUL ALGAL BLOOMS; LUCIFERASE SEQUENCES; BIOLUMINESCENCE; GROWTH; RATES	English	Article	Web of Science
Diversity of dinoflagellate assemblages in coastal temperate and offshore tropical waters of Australia	2021	10.1186/s12862-021-01745-5						PubMed
Diversity of phlD alleles in the rhizosphere of wheat cropped under annual rice-wheat rotation in fields of the Indo-Gangetic plains: Influence of cultivation conditions	2006		The antibiotic 2,4-diacetyphloroglucinol is a major determinant in the biocontrol of plant growth promoting rhizobacteria associated with crops of agronomic relevance. The phlD gene is a useful marker of genetic and phenotypic diversity of 2,4-DAPG-producing rhizobacteria. A two-step amplification procedure was developed in order to assess directly the presence of phlD in environmental DNA, avoid…	2,4-dapg; Phld; Rice-wheat; Wheat Rhizosphere		English	Article	Scopus
Diversity of phlD alleles in the rhizosphere of wheat cropped under annual rice-wheat rotation in fields of the Indo-Gangetic plains:: influence of cultivation conditions	2006		The antibiotic 2,4-diacetyphloroglucinol is a major determinant in the biocontrol of plant growth promoting rhizobacteria associated with crops of agronomic relevance. The phlD gene is a useful marker of genetic and phenotypic diversity of 2,4-DAPG-producing rhizobacteria. A two-step amplification procedure was developed in order to assess directly the presence of phlD in environmental DNA, avoid…	2,4-DAPG; wheat rhizosphere; rice-wheat; phlD	BLACK ROOT-ROT; PLANT-GROWTH; FLUORESCENT PSEUDOMONAS; BIOCONTROL; 2,4-DIACETYLPHLOROGLUCINOL; RHIZOBACTERIA; FREQUENCY; TOBACCO; SOILS	English	Article	Web of Science
DNA and eDNA-based tracking of the North African sharptooth catfish Clarias gariepinus	2020	10.1016/j.mcp.2020.101535	The African sharptooth catfish, Clarias gariepinus, contributes much to the River Nile ecosystem by its high omnivorosity, sturdiness, growth rates, and fecundity. It was globally appreciated as a key fluvial aquaculture species. Yet, it is also one of the top world freshwater aliens. Monitoring the genetic diversity of different economically and ecologically important species as well as developm…	Clarias Gariepinus; Edna Tracking; Genetic Diversity; Population Genetics; Qpcr; Cytochrome C Oxidase; Dna; Dna; Dna Primers; Electron Transport Complex Iv; Cytochrome C Oxidase; Cytochrome Oxidase Subunit I; Dna; Dna 16s; Environmental Dna; Mitochondrial Enzyme; Unclassified Drug; Primer Dna; Article; Clarias Gariepinus; Controlled Study; Dna Extraction; Egypt; Fisherman; Fishing; Genetic Variab…	cytochrome c oxidase; cytochrome oxidase subunit I; DNA; DNA 16S; environmental DNA; mitochondrial enzyme; unclassified drug; primer DNA; Article; Clarias gariepinus; controlled study; DNA extraction; Egypt; fisherman; fishing; genetic variability; mitochondrial genetics; non invasive procedure; nonhuman; nucleotide sequence; population abundance; population genetics; priority journal; quantitati…	English	Article	Scopus
DNA and eDNA-based tracking of the North African sharptooth catfish Clarias gariepinus	2020	10.1016/j.mcp.2020.101535	The African sharptooth catfish, Clarias gariepinus, contributes much to the River Nile ecosystem by its high omnivorosity, sturdiness, growth rates, and fecundity. It was globally appreciated as a key fluvial aquaculture species. Yet, it is also one of the top world freshwater aliens. Monitoring the genetic diversity of different economically and ecologically important species as well as developm…	Clarias gariepinus; eDNA tracking; Genetic diversity; Population genetics; qPCR	ENVIRONMENTAL DNA; GENETIC DIVERSITY; MITOCHONDRIAL-DNA; DIFFERENTIATION; MACROCEPHALUS; EXTRACTION; OCCUPANCY; ABUNDANCE; BURCHELL; MARINE	English	Article	Web of Science
DNA and eDNA-based tracking of the North African sharptooth catfish Clarias gariepinus	2020	10.1016/j.mcp.2020.101535						PubMed
DNA barcoding is currently unreliable for species identification in most crayfishes	2024	10.1002/ece3.70050	DNA barcoding is commonly used for species identification. Despite this, there has not been a comprehensive assessment of the utility of DNA barcoding in crayfishes (Decapoda: Astacidea). Here we examined the extent to which local barcoding gaps (used for species identification) and global barcoding gaps (used for species discovery) exist among crayfishes, and whether global gaps met a previously…	cryptic species; decapod; global barcoding gap; local barcoding gap; species delimitation; species identification	FRESH-WATER CRAYFISH; DECAPODA CAMBARIDAE; MITOCHONDRIAL PSEUDOGENES; CRYPTIC DIVERSITY; NORTH-CAROLINA; RIVER-BASIN; CONSERVATION; EDNA; BIODIVERSITY; DELIMITATION	English	Article	Web of Science
DNA Barcoding Southwestern Atlantic Skates: A 20-Year Effort in Building a Species Identification Library	2025	10.3390/d17050311	The skate fauna in the Southwest Atlantic Ocean (SWA; 34–55° S) is represented by ~32 species, many of which share external features that have led to misidentifications and deficient fishery statistics. The use of DNA barcoding to discriminate SWA skate species was explored after 20 years of surveys. COI sequences were subjected to distance-based neighbor-joining (NJ), maximum likelihood (ML), ba…	Chondrichthyes; Diversity; Dna Barcoding; Skates; Southwest Atlantic; Dna; Fish; Fishery Management; Species Diversity; Species Richness; Taxonomy	DNA; fish; fishery management; species diversity; species richness; taxonomy	English	Article	Scopus
DNA Barcoding Southwestern Atlantic Skates: A 20-Year Effort in Building a Species Identification Library	2025	10.3390/d17050311	The skate fauna in the Southwest Atlantic Ocean (SWA; 34-55 degrees S) is represented by similar to 32 species, many of which share external features that have led to misidentifications and deficient fishery statistics. The use of DNA barcoding to discriminate SWA skate species was explored after 20 years of surveys. COI sequences were subjected to distance-based neighbor-joining (NJ), maximum li…	Chondrichthyes; skates; diversity; DNA barcoding; Southwest Atlantic	RAJIFORMES RAJIDAE; CHONDRICHTHYES; BATHYRAJA; FISHES; SUBSTITUTIONS; SEQUENCE; DIPTURUS; REVEALS; GUNTHER; MARINE	English	Article	Web of Science
DNA damage repair: historical perspectives, mechanistic pathways and clinical translation for targeted cancer therapy	2021	10.1038/s41392-021-00648-7	Genomic instability is the hallmark of various cancers with the increasing accumulation of DNA damage. The application of radiotherapy and chemotherapy in cancer treatment is typically based on this property of cancers. However, the adverse effects including normal tissues injury are also accompanied by the radiotherapy and chemotherapy. Targeted cancer therapy has the potential to suppress cance…	Alantolactone; Alpelisib; Avelumab; Buparlisib; Cathepsin D; Cetuximab; Cisplatin; Decitabine; Dna Topoisomerase (atp Hydrolysing); Durvalumab; Enzalutamide; Epidermal Growth Factor Receptor; Fluorouracil; Gefitinib; Gemcitabine; Ipilimumab; Mibefradil; Niraparib; Nivolumab; Olaparib; Pembrolizumab; Prednisone; Protein; Resveratrol; Rituximab; Rucaparib; Sipuleucel T; Talazoparib; Trametinib; Val…	alantolactone; alpelisib; ATM protein; ATR protein; avelumab; buparlisib; calcium channel blocking agent; cathepsin D; cetuximab; cisplatin; decitabine; DNA topoisomerase (ATP hydrolysing); durvalumab; environmental DNA; enzalutamide; epidermal growth factor receptor; fluorouracil; gefitinib; gemcitabine; histone deacetylase inhibitor; histone H2AX; immunoglobulin enhancer binding protein; ipilim…	English	Review	Scopus
DNA metabarcoding dietary analyses of the wood mouse Apodemus speciosus on Innoshima Island, Japan, and implications for primer choice	2022	10.1007/s13364-021-00601-7	We used DNA metabarcoding to assess the seasonal diets of the large Japanese wood mouse, Apodemus speciosus (Muridae, Rodentia), in forest edges adjacent to citrus orchards on Innoshima Island, Japan. We used one chloroplast and three mitochondrial DNA barcoding markers to determine mouse diets. Among the various plant and invertebrate diets, A. speciosus typically consumed Chinese cork oak (Quer…	eDNA; Food web; Pest control; Primer choice; Seasonal dietary variations; Wood mice	SETO INLAND SEA; FIELD-MOUSE; GENETIC DIVERSITY; MURIDAE; LANDSCAPE; RODENTIA	English	Article	Web of Science
DNA Nanosieve-Based Regenerative Electrochemical Biosensor Utilizing Nucleic Acid Flexibility for Accurate Allele Typing in Clinical Samples	2021	10.1021/acssensors.0c02720	Herein, an interface-based DNA nanosieve that has the ability to differentiate ssDNA from dsDNA has been demonstrated for the first time. The DNA nanosieve could be readily built through thiol-DNA’s self-assembly on the gold electrode surface, and its cavity size was tunable by varying the concentration of thiol-DNAs. Electrochemical chronocoulometry using [Ru(NH3)6] 3+ as redox revealed that the…	electrochemical DNA sensor, regenerative biosensor, allele typing, DNA nanotechnology, clinical sample		English	Article	PubMed
Do temperature and population size structure influence the quantity of fish eDNA in water?	2023	10.3389/fenvs.2023.1193393	Various factors can influence the concentration of eDNA found in the environment and blur the link between eDNA results and in situ fish abundances, biomasses or even occurrences. We studied the influence of one abiotic factor, the temperature, and one biotic factor, the fish size class, on the amount of fish eDNA detectable in water. To do so, we conducted two controlled experiments using tench …	Edna Quantification; Mesocosm; Metabarcoding; Teleo; Tinca Tinca		English	Article	Scopus
Do temperature and population size structure influence the quantity of fish eDNA in water?	2023	10.3389/fenvs.2023.1193393	Various factors can influence the concentration of eDNA found in the environment and blur the link between eDNA results and in situ fish abundances, biomasses or even occurrences. We studied the influence of one abiotic factor, the temperature, and one biotic factor, the fish size class, on the amount of fish eDNA detectable in water. To do so, we conducted two controlled experiments using tench …	mesocosm; Tinca tinca; eDNA quantification; teleo; metabarcoding	ENVIRONMENTAL DNA; BIOMASS; BIODIVERSITY; DEGRADATION; ABUNDANCE; BIGHEAD	English	Article	Web of Science
Does Size Matter? An Experimental Evaluation of the Relative Abundance and Decay Rates of Aquatic Environmental DNA	2018	10.1021/acs.est.8b01071	Environmental DNA (eDNA) is increasingly used to monitor aquatic macrofauna. Typically, short mitochondrial DNA fragments are targeted because these should be relatively more abundant in the environment as longer fragments will break into smaller fragments over time. However, longer fragments may permit more flexible primer design and increase taxonomic resolution for eDNA metabarcoding analyses,…	Dna, Mitochondrial; Decay (organic); Aquatic Environments; Environmental Water Samples; Experimental Evaluation; Mitochondrial Dna; Nuclear Fragments; Primer Design; Relative Abundance; Taxonomic Resolution; Fish; Mitochondrial Dna; Aquatic Environment; Article; Controlled Study; Dna Fragmentation; Freshwater Environment; Genetic Variability; Goldfish; Haplotype; High Throughput Sequencing; Limit…	Decay (organic); Aquatic environments; Environmental water samples; Experimental evaluation; Mitochondrial DNA; Nuclear fragments; Primer design; Relative abundance; Taxonomic resolution; Fish; mitochondrial DNA; aquatic environment; Article; controlled study; DNA fragmentation; freshwater environment; genetic variability; goldfish; haplotype; high throughput sequencing; limit of detection; mitoc…	English	Article	Scopus
Drainage Reorganization and Intraspecific Genetic Diversity of Riverine Fish in the Ligurian Alps and Northern Apennines	2025	10.1029/2024JF008028	Mountain building reorganizes drainage networks, influencing riverine biodiversity. Northern Italy offers a natural experiment in the impact of tectonic and geomorphic processes on aquatic species distribution. We combined geomorphic analysis with environmental DNA from rivers to assess the influence of tectonically driven drainage reorganization on genetic diversity, targeting an endemic fish sp…	Biodiversity; Drainage Reorganization; Edna; Geomorphology; Landscape Evolution; Tectonics; Advection; Alpine Orogeny; Biodiversity; Cyprinid; Dna Fingerprinting; Drainage; Ecological Zonation; Endemic Species; Faulting; Genetic Differentiation; Geomorphology; Landscape Evolution; River; Slab; Tectonics; Alps; Apennines; Italy; Ligurian Alps; Western Alps	advection; Alpine orogeny; biodiversity; cyprinid; DNA fingerprinting; drainage; ecological zonation; endemic species; faulting; genetic differentiation; geomorphology; landscape evolution; river; slab; tectonics; Alps; Apennines; Italy; Ligurian Alps; Western Alps	English	Article	Scopus
Drainage Reorganization and Intraspecific Genetic Diversity of Riverine Fish in the Ligurian Alps and Northern Apennines	2025	10.1029/2024JF008028	Mountain building reorganizes drainage networks, influencing riverine biodiversity. Northern Italy offers a natural experiment in the impact of tectonic and geomorphic processes on aquatic species distribution. We combined geomorphic analysis with environmental DNA from rivers to assess the influence of tectonically driven drainage reorganization on genetic diversity, targeting an endemic fish sp…	geomorphology; landscape evolution; biodiversity; drainage reorganization; eDNA; tectonics	FRESH-WATER FISHES; ENVIRONMENTAL DNA; TELESTES-MUTICELLUS; SOUTH ISLAND; EVOLUTION; CAPTURE; CONSERVATION; BIODIVERSITY; DIVERSIFICATION; PHYLOGEOGRAPHY	English	Article	Web of Science
Early detection and spatial monitoring of an emerging biological invasion by population genetics and environmental DNA metabarcoding	2019	10.1111/csp2.86	Rapid management responses against invasive species soon after their establishment are the most efficient way to limit their biological and economic impacts. Early detection and reliable monitoring is however challenging when cryptic taxa are involved. Here we show how environmental DNA (eDNA) metabarcoding of water samples efficiently unveiled an emerging invasion of Italian crested newts (Tritu…	Amphibian; Conservation Genetics; Environmental Dna; Invasion Monitoring; Newt; Triturus Carnifex		English	Article	Scopus
Early detection and spatial monitoring of an emerging biological invasion by population genetics and environmental DNA metabarcoding	2019	10.1111/csp2.86	Rapid management responses against invasive species soon after their establishment are the most efficient way to limit their biological and economic impacts. Early detection and reliable monitoring is however challenging when cryptic taxa are involved. Here we show how environmental DNA (eDNA) metabarcoding of water samples efficiently unveiled an emerging invasion of Italian crested newts (Tritu…	amphibian; conservation genetics; environmental DNA; invasion monitoring; newt; Triturus carnifex	NEWTS TRITURUS-CRISTATUS; CARNIFEX; INTROGRESSION; MITOCHONDRIAL; HYBRIDIZATION; SURVEILLANCE; POLLUTION; CONGENER; ZONES; BASIN	English	Article	Web of Science
Early detection of aquatic invaders using metabarcoding reveals a high number of non-indigenous species in Canadian ports	2016	10.1111/ddi.12465	Aim Invasive species represent one of the greatest threats to biodiversity. The ability to detect non-indigenous species (NIS), particularly those present at low abundance, is limited by difficulties in performing exhaustive sampling and in identifying species. Here we sample zooplankton from 16 major Canadian ports and apply a metabarcoding approach to detect NIS. Location Marine and freshwater …	18S; biodiversity; biomonitoring; high-throughput sequencing; invasive species; metabarcoding; operational taxonomic unit	ENVIRONMENTAL DNA; BIODIVERSITY ASSESSMENT; ECONOMIC COSTS; MARINE; SURVEILLANCE; SENSITIVITY; INVASIONS; MARKERS; EXAMPLE; RISK	English	Article	Web of Science
Early warning: Detection of exotic coho salmon (oncorhynchus kisutch) by environmental dna and evidence of establishment at the extreme south of patagonia	2019	10.1139/cjfas-2018-0271	The global expansion of aquaculture is a constant propagule pressure that enables the establishment of exotic species in freshwater and marine environments. Here, we provide the first report on the presence of exotic coho salmon (Oncorhynchus kisutch) at the extreme south of Patagonia, in the island of Tierra del Fuego (TDF). During the last 6 years, 43 juvenile coho salmon were captured along th…	Aquaculture Production; Detection Method; Dna; Genetic Analysis; Juvenile; Propagule; Range Expansion; Salmonid; Salmonid Fishery; Smolt; Beagle Channel; North America; Patagonia; Tierra Del Fuego [(isg) South America]; Oncorhynchus Kisutch	aquaculture production; detection method; DNA; genetic analysis; juvenile; propagule; range expansion; salmonid; salmonid fishery; smolt; Beagle Channel; North America; Patagonia; Tierra del Fuego [(ISG) South America]; Oncorhynchus kisutch	English	Article	Scopus
Early warning: detection of exotic coho salmon (Oncorhynchus kisutch) by environmental DNA and evidence of establishment at the extreme south of Patagonia	2019	10.1139/cjfas-2018-0271	The global expansion of aquaculture is a constant propagule pressure that enables the establishment of exotic species in freshwater and marine environments. Here, we provide the first report on the presence of exotic coho salmon (Oncorhynchus kisutch) at the extreme south of Patagonia, in the island of Tierra del Fuego (TDF). During the last 6 years, 43 juvenile coho salmon were captured along th…		FRESH-WATER FISHES; MITOCHONDRIAL-DNA; CONTROL-REGION; TSHAWYTSCHA; POPULATIONS; INVASION; SEQUENCE; AMERICA; GROWTH; CHILE	English	Article	Web of Science
Early-succession secondary forests following agropastoral abandonment are key winter habitats for the conservation of a priority bird in the European Alps	2022	10.1007/s10342-022-01485-1	In contrast to old-growth forests, early-successional stands remain understudied despite potentially harbouring species of conservation interest. With this work, focused on hazel grouse Tetrastes bonasia, a cryptic and indicator species known to select for close-to-natural forests, we evaluated winter densities, home range, microhabitat selection and diet, combining DNA-based mark-recapture and m…	Edna; Forest Succession; Habitat Selection; Tetraonid; Tetrastes Bonasia; Angiosperm; Arthropod; Bird; Dna; Habitat; Habitat Selection; Secondary Forest; Species Conservation; Alps	angiosperm; arthropod; bird; DNA; habitat; habitat selection; secondary forest; species conservation; Alps	English	Article	Scopus
Early-succession secondary forests following agropastoral abandonment are key winter habitats for the conservation of a priority bird in the European Alps	2022	10.1007/s10342-022-01485-1	In contrast to old-growth forests, early-successional stands remain understudied despite potentially harbouring species of conservation interest. With this work, focused on hazel grouse Tetrastes bonasia, a cryptic and indicator species known to select for close-to-natural forests, we evaluated winter densities, home range, microhabitat selection and diet, combining DNA-based mark-recapture and m…	Forest succession; Tetrastes bonasia; eDNA; Habitat selection; Tetraonid	GROUSE BONASA-BONASIA; CAPERCAILLIE TETRAO-UROGALLUS; MITOCHONDRIAL-DNA; POPULATION; BIODIVERSITY; SELECTION; SIZE; SUITABILITY; INDICATORS; DIVERSITY	English	Article	Web of Science
Ecological divergence of a habitat constructed to harbor an endangered species	2021	10.1111/csp2.471	Ecological restoration, habitat creation, and artificial refuges are increasingly essential for conservation, particularly for species that are threatened by the loss or degradation of critical habitat. The Devils Hole pupfish (Cyprinodon diabolis) exists in a single small locality subject to the detrimental effects of local groundwater extraction, limited resources, and the gradual deterioration…			English	Article	Scopus
Ecological divergence of a habitat constructed to harbor an endangered species	2021	10.1111/csp2.471	Ecological restoration, habitat creation, and artificial refuges are increasingly essential for conservation, particularly for species that are threatened by the loss or degradation of critical habitat. The Devils Hole pupfish (Cyprinodon diabolis) exists in a single small locality subject to the detrimental effects of local groundwater extraction, limited resources, and the gradual deterioration…	community ecology; Cyprinodon diabolis; Devils Hole; environmental DNA; metagenetic survey	DEVILS HOLE; PHENOTYPIC PLASTICITY; CLIMATE-CHANGE; PHYTOPLANKTON; COMMUNITIES; DIVERSITY; DYNAMICS	English	Article	Web of Science
Ecological functions of zoosporic hyperparasites	2014	10.3389/fmicb.2014.00244	Zoosporic parasites have received increased attention during the last years, but it is still largely unnoted that these parasites can themselves be infected by hyperparasites. Some members of the Chytridiomycota, Blastocladiomycota, Cryptomycota, Hyphochytriomycota, Labyrinthulomycota, Oomycota, and Phytomyxea are hyperparasites of zoosporic hosts. Because of sometimes complex tripartite interact…	Ecology; Edna; Food Web; Hyperparasites; Parasite; Zoospores; Biodiversity; Blastocladiomycota; Chytridiomycetes; Community Ecology; Defense Mechanism; Dna Sequence; Food Web; Fungus Hyphae; Host Parasite Interaction; Host Range; Nonhuman; Oomycetes; Oospore; Parasite; Parasite Phenomena And Functions; Plasmodiophorida; Population Size; Review; Zoospore; Zoosporic Hyperparasite	biodiversity; Blastocladiomycota; Chytridiomycetes; community ecology; defense mechanism; DNA sequence; food web; fungus hyphae; host parasite interaction; host range; nonhuman; Oomycetes; oospore; parasite; parasite phenomena and functions; Plasmodiophorida; population size; review; zoospore; zoosporic hyperparasite	English	Review	Scopus
Ecosystem biomonitoring with eDNA: Metabarcoding across the tree of life in a tropical marine environment	2017	10.1038/s41598-017-12501-5	Effective marine management requires comprehensive data on the status of marine biodiversity. However, efficient methods that can document biodiversity in our oceans are currently lacking. Environmental DNA (eDNA) sourced from seawater offers a new avenue for investigating the biota in marine ecosystems. Here, we investigated the potential of eDNA to inform on the breadth of biodiversity present …	Dna; Dna; Dna; Sea Water; Animal; Aquatic Species; Chemistry; Classification; Dna Sequence; Environmental Monitoring; Evaluation Study; Genetics; Metagenomics; Procedures; Sensitivity And Specificity; Tropic Climate; Animals; Aquatic Organisms; Environmental Monitoring; Metagenomics; Seawater; Sensitivity And Specificity; Sequence Analysis, Dna; Tropical Climate	DNA; sea water; animal; aquatic species; chemistry; classification; DNA sequence; environmental monitoring; evaluation study; genetics; metagenomics; procedures; sensitivity and specificity; tropic climate; Animals; Aquatic Organisms; Environmental Monitoring; Metagenomics; Seawater; Sensitivity and Specificity; Sequence Analysis, DNA; Tropical Climate	English	Article	Scopus
Ecosystem biomonitoring with eDNA: metabarcoding across the tree of life in a tropical marine environment	2017	10.1038/s41598-017-12501-5	Effective marine management requires comprehensive data on the status of marine biodiversity. However, efficient methods that can document biodiversity in our oceans are currently lacking. Environmental DNA (eDNA) sourced from seawater offers a new avenue for investigating the biota in marine ecosystems. Here, we investigated the potential of eDNA to inform on the breadth of biodiversity present …		BIODIVERSITY ASSESSMENT; FISH ASSEMBLAGES; DNA; REEF; SYMBIODINIUM; DIVERSITY; PERFORMANCE; CORALS; IMPACT; TOOL	English	Article	Web of Science
Ecosystem biomonitoring with eDNA: metabarcoding across the tree of life in a tropical marine environment	2017	10.1038/s41598-017-12501-5						PubMed
eDNA analysis reveals high invasion risks in nature reserves in Guangdong Province, China	2024	10.3389/fmars.2024.1462123	Introduction: Invasive species can cause ecological and economic damage in various areas, including nature reserves. The invasion risks of aquatic invasive vertebrates in nature reserves, however, remain unclear since this group often hides under the water and is frequently neglected in ecological surveys based on traditional methods. Methods: Environmental DNA (eDNA) provides a promising alterna…	Aquatic Vertebrate Species; Edna; Invasion Risk; Invasive Species; Nature Reserves		English	Article	Scopus
eDNA analysis reveals high invasion risks in nature reserves in Guangdong Province, China	2024	10.3389/fmars.2024.1462123	Introduction Invasive species can cause ecological and economic damage in various areas, including nature reserves. The invasion risks of aquatic invasive vertebrates in nature reserves, however, remain unclear since this group often hides under the water and is frequently neglected in ecological surveys based on traditional methods.Methods Environmental DNA (eDNA) provides a promising alternativ…	nature reserves; aquatic vertebrate species; invasive species; invasion risk; eDNA	TRACHEMYS-SCRIPTA-ELEGANS; ENVIRONMENTAL DNA; ZOOPLANKTON; IMPACTS	English	Article	Web of Science
eDNA and Acoustic Tag Monitoring Reveal Congruent Overwintering Distributions of Striped Bass in a Hydrologically Complex Estuarine Environment	2022	10.3390/fishes7040183	After collapsing in the late 1990s, the southern Gulf of St. Lawrence population of striped bass (Morone saxatilis) is recovering. Here, we evaluate the use of under-ice eDNA sampling to monitor the population and confirm overwintering locations. From 2018 to 2020, water samples were collected from transects spanning 35 km of the Miramichi River system, accounting for the effects of sampling site…	Acoustic Telemetry; Environmental Dna; Estuary; Overwintering; Striped Bass; Tidal		English	Article	Scopus
eDNA and Acoustic Tag Monitoring Reveal Congruent Overwintering Distributions of Striped Bass in a Hydrologically Complex Estuarine Environment	2022	10.3390/fishes7040183	After collapsing in the late 1990s, the southern Gulf of St. Lawrence population of striped bass (Morone saxatilis) is recovering. Here, we evaluate the use of under-ice eDNA sampling to monitor the population and confirm overwintering locations. From 2018 to 2020, water samples were collected from transects spanning 35 km of the Miramichi River system, accounting for the effects of sampling site…	environmental DNA; striped bass; overwintering; estuary; tidal; acoustic telemetry	POPULATION CHARACTERISTICS; MORONE-SAXATILIS; FISH ABUNDANCE; DNA DETECTION; LIFE-HISTORY; TOOL; TEMPERATURE; DEGRADATION; COLD	English	Article	Web of Science
eDNA confirms lower trophic interactions help to modulate population outbreaks of the notorious crown- of- thorns sea star	2025	10.1073/pnas.2424560122	Variability in predator-prey interactions can modulate population dynamics with impacts scalable to entire ecosystems. As notorious corallivores, crown-of-thorns sea stars (CoTS; Acanthaster spp.) have caused extensive losses of coral habitat during unexplained population outbreaks across the Indo-Pacific. While predation of adult CoTS may help to suppress their outbreaks, it does not sufficientl…	juvenile; structural equation model; predation; molecular; pest species	GREAT-BARRIER-REEF; ACANTHASTER-PLANCI; POSTSETTLEMENT PROCESSES; BIOLOGICAL-CONTROL; BIOCONTROL; MORTALITY; DYNAMICS; RATES	English	Article	Web of Science
eDNA confirms lower trophic interactions help to modulate population outbreaks of the notorious crown-of-thorns sea star	2025	10.1073/pnas.2424560122	Variability in predator-prey interactions can modulate population dynamics with impacts scalable to entire ecosystems. As notorious corallivores, crown-of-thorns sea stars (CoTS; Acanthaster spp.) have caused extensive losses of coral habitat during unexplained population outbreaks across the Indo-Pacific. While predation of adult CoTS may help to suppress their outbreaks, it does not sufficientl…	Juvenile; Molecular; Pest Species; Predation; Structural Equation Model; Dna, Environmental; Dneasy Blood And Tissue Kit; Environmental Dna; Acanthaster; Adult; Animal Experiment; Animal Model; Article; Autocorrelation; Bayesian Network; Benthos; Calculation; Community Structure; Content Analysis; Controlled Study; Copy Number Variation; Coral; Corallivore; Crab; Cryptic Species; Dna Extraction; …	environmental DNA; Acanthaster; adult; animal experiment; animal model; Article; autocorrelation; Bayesian network; benthos; calculation; community structure; content analysis; controlled study; copy number variation; coral; corallivore; crab; cryptic species; DNA extraction; ecosystem; habitat; hierarchical clustering; juvenile; macroalga; Markov chain Monte Carlo method; mortality; nonhuman; pe…	English	Article	Scopus
eDNA confirms lower trophic interactions help to modulate population outbreaks of the notorious crown-of-thorns sea star	2025	10.1073/pnas.2424560122						PubMed
eDNA Detection of Native and Invasive Crayfish Species Allows for Year-Round Monitoring and Large-Scale Screening of Lotic Systems	2021	10.3389/fenvs.2021.639380	Effective management of both endangered native and invasive alien crayfishes requires knowledge about distribution, monitoring of existing and early detection of newly established populations. Complementary to traditional survey methods, eDNA sampling has recently emerged as a highly sensitive non-invasive detection method to monitor crayfish populations. To advance the use of eDNA as detection t…	Crayfish; Environmental Dna; Freshwater Systems; Monitoring; Species Detection		English	Article	Scopus
eDNA Detection of Native and Invasive Crayfish Species Allows for Year-Round Monitoring and Large-Scale Screening of Lotic Systems	2021	10.3389/fenvs.2021.639380	Effective management of both endangered native and invasive alien crayfishes requires knowledge about distribution, monitoring of existing and early detection of newly established populations. Complementary to traditional survey methods, eDNA sampling has recently emerged as a highly sensitive non-invasive detection method to monitor crayfish populations. To advance the use of eDNA as detection t…	environmental DNA; species detection; crayfish; freshwater systems; monitoring	ENVIRONMENTAL DNA EDNA; WHITE-CLAWED CRAYFISH; FRESH-WATER CRAYFISH; AUSTROPOTAMOBIUS-PALLIPES; SIGNAL CRAYFISH; PACIFASTACUS-LENIUSCULUS; ORCONECTES-RUSTICUS; DECAPODA ASTACIDEA; CONSERVATION; BARRIERS	English	Article	Web of Science
eDNA monitoring as a tool for evaluating the reintroduction of Austropotamobius pallipes after a crayfish plague outbreak	2023	10.1016/j.jip.2023.108026	The crayfish plague, a severe disease caused by the oomycete Aphanomyces astaci, is responsible for most population declines of susceptible crayfish in Europe. This pathogen has been devastating native populations of Austropotamobius pallipes since the 1970s in the Iberian Peninsula. In this study, we report a massive mortality event in one of the most important Spanish populations of A. pallipes…	Invasive Alien Species; Aphanomyces astaci; eDNA monitoring; Endangered species conservation; Native species reintroduction	FUNGUS APHANOMYCES-ASTACI; WHITE-CLAWED CRAYFISH; ENVIRONMENTAL DNA; RANDOM AMPLIFICATION; GENETIC DIVERSITY; NOBLE CRAYFISH; WATER; ORIGIN; AGENT; EPIZOOTICS	English	Article	Web of Science
edna2021: The fourth annual meeting of The eDNA Society “Species distributions, and beyond”	2022	10.1002/edn3.278	The eDNA Society was founded in Japan in 2018 to develop eDNA science as a discipline that contributes to the human well-being and the sustainable use of ecosystems. Since then, the society has expanded attracting a wide variety of people from international universities, research institutes, consultant companies, and local/national governments. Here we report edna2021, the fourth annual meeting o…	Ecology; Evolution; Practical Implementation; Species Distribution		English	Note	Scopus
edna2021: The fourth annual meeting of The eDNA Society Species distributions, and beyond	2022	10.1002/edn3.278	The eDNA Society was founded in Japan in 2018 to develop eDNA science as a discipline that contributes to the human well-being and the sustainable use of ecosystems. Since then, the society has expanded attracting a wide variety of people from international universities, research institutes, consultant companies, and local/national governments. Here we report edna2021, the fourth annual meeting o…	ecology; evolution; practical implementation; species distribution		English	Editorial Material	Web of Science
eDNA-Based Early Detection Illustrates Rapid Spread of the Non-Native Golden Mussel Introduced into Beijing via Water Diversion	2024	10.3390/ani14030399	Simple Summary The world's largest water diversion, the South-to-North Water Transfer Project (SNWTP) in China, diverts water from the Danjiangkou Reservoir in the Yangtze River basin to major cities such as Beijing and Tianjin in North China. This water diversion has effectively created an invasion highway, facilitating the spread of non-native invasive species such as golden mussels (Limnoperna…	early detection; environmental DNA; golden mussel Limnoperna fortunei; invasive mollusk; water diversion	POST-ESTABLISHMENT SPREAD; LIMNOPERNA-FORTUNEI; GENETIC DIVERSITY; INVASIONS; RIVER; MECHANISMS; STRATEGIES; EXPANSION; DYNAMICS	English	Article	Web of Science
eDNA-Based Evaluation of the Haplotypic Diversity of Orange-Spotted Grouper (Epinephelus coioides) in Stock Enhancement Areas of Wanshan Archipelago	2025	10.1007/s10126-025-10471-8	The orange-spotted grouper (Epinephelus coioides) is an economically important marine species in the South China Sea. Due to overfishing and environmental pollution, its natural resources in the South China Sea have severely declined. Evaluation of genetic diversity of the orange-spotted grouper in the distribution areas is important for future conservation action. In this study, a molecular mark…	12s Rdna; D-loop; Edna; Species-specific Marker; Stock Enhancement; Dna, Environmental; Biodiversity; Biotic; Conservation; Ecology; Fisheries; Group Technology; 12s Rdna; Community Structures; D-loop; Edna; Genetics Diversities; Haplotypes; Marine Species; South China; Species-specific Markers; Stock Enhancement; Citrus Fruits; Biomarker; Commercial Species; Community Structure; Conservation Man…	Biodiversity; Biotic; Conservation; Ecology; Fisheries; Group technology; 12s rDNA; Community structures; D-loop; EDNA; Genetics diversities; Haplotypes; Marine species; South China; Species-specific markers; Stock enhancement; Citrus fruits; biomarker; commercial species; community structure; conservation management; DNA; genetic analysis; molecular analysis; monitoring system; perciform; popula…	English	Article	Scopus
eDNA-Based Evaluation of the Haplotypic Diversity of Orange-Spotted Grouper (Epinephelus coioides) in Stock Enhancement Areas of Wanshan Archipelago	2025	10.1007/s10126-025-10471-8	The orange-spotted grouper (Epinephelus coioides) is an economically important marine species in the South China Sea. Due to overfishing and environmental pollution, its natural resources in the South China Sea have severely declined. Evaluation of genetic diversity of the orange-spotted grouper in the distribution areas is important for future conservation action. In this study, a molecular mark…	EDNA; D-loop; 12S rDNA; Species-specific marker; Stock enhancement	GENETIC DIVERSITY; IDENTIFICATION	English	Article	Web of Science
eDNA-Based Evaluation of the Haplotypic Diversity of Orange-Spotted Grouper (Epinephelus coioides) in Stock Enhancement Areas of Wanshan Archipelago	2025	10.1007/s10126-025-10471-8						PubMed
ednaoccupancy: An r package for multiscale occupancy modelling of environmental DNA data	2018	10.1111/1755-0998.12735	In this article, we describe ednaoccupancy, an r package for fitting Bayesian, multiscale occupancy models. These models are appropriate for occupancy surveys that include three nested levels of sampling: primary sample units within a study area, secondary sample units collected from each primary unit and replicates of each secondary sample unit. This design is commonly used in occupancy surveys …	Bayesian; Environmental Dna; Occupancy Survey; Species Distribution Model; Dna; Dna; Dna; Biology; Environment; Genetics; Isolation And Purification; Phylogeography; Population Genetics; Procedures; Software; Spatial Analysis; Computational Biology; Environment; Genetics, Population; Phylogeography; Software; Spatial Analysis	DNA; biology; environment; genetics; isolation and purification; phylogeography; population genetics; procedures; software; spatial analysis; Computational Biology; Environment; Genetics, Population; Phylogeography; Software; Spatial Analysis	English	Article	Scopus
Effects of abiotic factors on the phylogenetic diversity of bacterial communities in acidic thermal springs	2007	10.1128/AEM.02567-06	Acidic thermal springs offer ideal environments for studying processes underlying extremophile microbial diversity. We used a carefully designed comparative analysis of acidic thermal springs in Yellowstone National Park to determine how abiotic factors (chemistry and temperature) shape acidophile microbial communities. Small-subunit rRNA gene sequences were PCR amplified, cloned, and sequenced, …	Dna, Bacterial; Dna, Ribosomal; Minerals; Rna, Ribosomal, 16s; Colorimetric Analysis; Dna; Genes; Geothermal Springs; Optical Emission Spectroscopy; Principal Component Analysis; Sediments; X Ray Diffraction; X Ray Spectroscopy; Abiotic Factors; Electron Acceptors; Electronic Probes; Water Chemistry; Bacteria; Acidity; Dna Fingerprinting; Environmental Factor; Extremophile; Genetic Variation; Mic…	Colorimetric analysis; DNA; Genes; Geothermal springs; Optical emission spectroscopy; Principal component analysis; Sediments; X ray diffraction; X ray spectroscopy; Abiotic factors; Electron acceptors; Electronic probes; Water chemistry; Bacteria; acidity; DNA fingerprinting; environmental factor; extremophile; genetic variation; microbial community; phylogenetics; polymerase chain reaction; pri…	English	Article	Scopus
Effects of abiotic factors on the phylogenetic diversity of bacterial communities in acidic thermal springs	2007	10.1128/AEM.02567-06	Acidic thermal springs offer ideal environments for studying processes underlying extremophile microbial diversity. We used a carefully designed comparative analysis of acidic thermal springs in Yellowstone National Park to determine how abiotic factors (chemistry and temperature) shape acidophile microbial communities. Small-subunit rRNA gene sequences were PCR amplified, cloned, and sequenced, …		YELLOWSTONE-NATIONAL-PARK; HOT-SPRINGS; MICROBIAL DIVERSITY; MOLECULAR ANALYSIS; SP. NOV.; MICROORGANISMS; ENVIRONMENT; TEMPERATURE; HYDROGEN; LIFE	English	Article	Web of Science
Effects of abiotic factors on the phylogenetic diversity of bacterial communities in acidic thermal springs	2007	10.1128/AEM.02567-06						PubMed
Effects of forest cover on richness of threatened fish species in Japan	2022	10.1111/cobi.13849	Estuaries––one of the most vulnerable ecosystems globally––face anthropogenic threats, including biodiversity loss and the collapse of sustainable fisheries. Determining the factors contributing to the maintenance of estuarine biodiversity, especially that of fish, is vital for promoting estuarine conservation and sustainability. We used environmental DNA metabarcoding analysis to determine fish …	Actividad Antropogénica; Anthropogenic Activity; Coastal Water Bodies; Cuerpos De Agua Costeros; Environmental Dna Metabarcoding; Estuario; Estuary; Land Use; Metasecuenciación De Adn Ambiental; Uso De Suelo; Biodiversity; Coastal Zone; Fish; Forest Cover; Red List; Species Richness; Japan; Animal; Ecosystem; Endangered Species; Environmental Protection; Forest; Animals; Biodiversity; Conservatio…	biodiversity; coastal zone; fish; forest cover; Red List; species richness; Japan; animal; ecosystem; endangered species; environmental protection; forest; Animals; Biodiversity; Conservation of Natural Resources; Ecosystem; Endangered Species; Fishes; Forests	English	Article	Scopus
Effects of forest cover on richness of threatened fish species in Japan	2022	10.1111/cobi.13849	Estuaries--one of the most vulnerable ecosystems globally--face anthropogenic threats, including biodiversity loss and the collapse of sustainable fisheries. Determining the factors contributing to the maintenance of estuarine biodiversity, especially that of fish, is vital for promoting estuarine conservation and sustainability. We used environmental DNA metabarcoding analysis to determine fish …	anthropogenic activity; coastal water bodies; environmental DNA metabarcoding; estuary; land use; actividad antropogenica; cuerpos de agua costeros; estuario; metasecuenciacion de ADN ambiental; uso de suelo	LAND-USE; WATER-QUALITY; PATTERNS; DECREASE; RIVERS	English	Article	Web of Science
Effects of forest cover on richness of threatened fish species in Japan	2022	10.1111/cobi.13849	Estuaries--one of the most vulnerable ecosystems globally--face anthropogenic threats, including biodiversity loss and the collapse of sustainable fisheries. Determining the factors contributing to the maintenance of estuarine biodiversity, especially that of fish, is vital for promoting estuarine conservation and sustainability. We used environmental DNA metabarcoding analysis to determine fish …	anthropogenic activity; coastal water bodies; environmental DNA metabarcoding; estuary; land use; actividad antropogenica; cuerpos de agua costeros; estuario; metasecuenciacion de ADN ambiental; uso de suelo	LAND-USE; WATER-QUALITY; PATTERNS; DECREASE; RIVERS	English	Article	PubMed
Effects of microbial DNA on human DNA profiles generated using the PowerPlex(®) 16 HS system	2017	10.1016/j.jflm.2017.09.010	Most crime scenes are not sterile and therefore may be contaminated with environmental DNA, especially if a decomposing body is found. Collecting biological evidence from this individual will yield DNA samples mixed with microbial DNA. This also becomes important if postmortem swabs are collected from sexually assaulted victims. Although genotyping kits undergo validation tests, including bacteri…	Decomposition; Forensic Science; Human Identification; Microbial; Powerplex® 16 Hs; Tpox; Dna; Dna; Dna, Bacterial; Allele; Bacillus Subtilis; Decomposition; Forensic Science; Genotype; Human; Mycobacterium Smegmatis; Nonhuman; Pathogen Load; Validation Process; Devices; Dna Contamination; Dna Fingerprinting; Forensic Genetics; Genetics; Pilot Study; Polymerase Chain Reaction; Bacterial Dna; Dna;…	allele; Bacillus subtilis; decomposition; forensic science; genotype; human; Mycobacterium smegmatis; nonhuman; pathogen load; validation process; devices; DNA contamination; DNA fingerprinting; forensic genetics; genetics; pilot study; polymerase chain reaction; bacterial DNA; DNA; DNA Contamination; DNA Fingerprinting; DNA, Bacterial; Forensic Genetics; Humans; Pilot Projects; Polymerase Chain …	English	Article	PubMed
Effects of microbial DNA on human DNA profiles generated using the PowerPlex® 16 HS system	2017	10.1016/j.jflm.2017.09.010	Most crime scenes are not sterile and therefore may be contaminated with environmental DNA, especially if a decomposing body is found. Collecting biological evidence from this individual will yield DNA samples mixed with microbial DNA. This also becomes important if postmortem swabs are collected from sexually assaulted victims. Although genotyping kits undergo validation tests, including bacteri…	Decomposition; Forensic Science; Human Identification; Microbial; Powerplex® 16 Hs; Tpox; Dna; Dna; Dna, Bacterial; Allele; Bacillus Subtilis; Decomposition; Forensic Science; Genotype; Human; Mycobacterium Smegmatis; Nonhuman; Pathogen Load; Validation Process; Devices; Dna Contamination; Dna Fingerprinting; Forensic Genetics; Genetics; Pilot Study; Polymerase Chain Reaction; Bacterial Dna; Dna;…	allele; Bacillus subtilis; decomposition; forensic science; genotype; human; Mycobacterium smegmatis; nonhuman; pathogen load; validation process; devices; DNA contamination; DNA fingerprinting; forensic genetics; genetics; pilot study; polymerase chain reaction; bacterial DNA; DNA; DNA Contamination; DNA Fingerprinting; DNA, Bacterial; Forensic Genetics; Humans; Pilot Projects; Polymerase Chain …	English	Article	Scopus
Effects of microbial DNA on human DNA profiles generated using the PowerPlex® 16 HS system	2017	10.1016/j.jflm.2017.09.010	Most crime scenes are not sterile and therefore may be contaminated with environmental DNA, especially if a decomposing body is found. Collecting biological evidence from this individual will yield DNA samples mixed with microbial DNA. This also becomes important if postmortem swabs are collected from sexually assaulted victims. Although genotyping kits undergo validation tests, including bacteri…	Forensic science; Human identification; TPOX; Microbial; PowerPlex (R) 16 HS; Decomposition	DEVELOPMENTAL VALIDATION; VAGINAL MICROBIOME; MULTIPLEX; DATABASE; SAMPLES	English	Article	Web of Science
Elusive Giant Invaders: A qPCR-Based eDNA Survey for Detecting the Introduced Clown Featherback (Notopteridae; Chitala ornata) in a Tropical Riverine System	2025	10.1002/aqc.70215	The consequences of biological invasions are often difficult to mitigate because it is challenging to extirpate invasive alien species (IAS) once they have established and spread in a new environment. Conservation actions to control IAS populations at early stages of introduction may help prevent invasions, but they need to be guided by efficient detection tools. Here, we examined the possibility…	Aquatic Conservation; Chitala Ornata; Environmental Dna; Ikan Belida; Invasive Species; Quantitative Pcr; Biological Invasion; Conservation Management; Detection Method; Dna; Fish; Introduced Species; Invasive Species; Polymerase Chain Reaction; Population Size; Quantitative Analysis; Water Temperature; Malaysia; Penang; Perai River; Southeast Asia; West Malaysia	biological invasion; conservation management; detection method; DNA; fish; introduced species; invasive species; polymerase chain reaction; population size; quantitative analysis; water temperature; Malaysia; Penang; Perai River; Southeast Asia; West Malaysia	English	Article	Scopus
Elusive Giant Invaders: A qPCR-Based eDNA Survey for Detecting the Introduced Clown Featherback (Notopteridae; Chitala ornata) in a Tropical Riverine System	2025	10.1002/aqc.70215	The consequences of biological invasions are often difficult to mitigate because it is challenging to extirpate invasive alien species (IAS) once they have established and spread in a new environment. Conservation actions to control IAS populations at early stages of introduction may help prevent invasions, but they need to be guided by efficient detection tools. Here, we examined the possibility…	aquatic conservation; Chitala ornata; environmental DNA; ikan belida; invasive species; quantitative PCR	ENVIRONMENTAL DNA ANALYSIS; SPECIES DETECTION; ABUNDANCE; BIOMASS; RISK	English	Article	Web of Science
Emerging use of air eDNA and its application to forensic investigations – A review	2024	10.1002/elps.202300228	Biological material is routinely collected at crime scenes and from exhibits and is a key type of evidence during criminal investigations. Improvements in DNA technologies allow collection and profiling of trace samples, comprised of few cells, significantly expanding the types of exhibits targeted for DNA analysis to include touched surfaces. However, success rates from trace and touch DNA sampl…	Air Sampling; Environmental Dna; Forensic Science; Human Dna Profiling; Cytochrome C Oxidase; Aquatic Organisms; Electrophoresis; Forensic Engineering; Forensic Science; Air Sampling; Crime Scenes; Criminal Investigation; Dna Profiling; Dna Technology; Environmental Dna; Forensic Investigation; Human Dna Profiling; Its Applications; Trace Samples; Dna; Cytochrome C Oxidase; Dna 16s; Environmental…	Aquatic organisms; Electrophoresis; Forensic engineering; Forensic science; Air sampling; Crime scenes; Criminal investigation; DNA profiling; DNA technology; Environmental DNA; Forensic investigation; Human DNA profiling; ITS applications; Trace samples; DNA; cytochrome c oxidase; DNA 16S; environmental DNA; mitochondrial DNA; snow; air; aerosol; air and air related phenomena; aquatic environmen…	English	Review	Scopus
Employing DNA barcoding as taxonomy and conservation tools for fish species censuses at the southeastern Mediterranean, a hot-spot area for biological invasion	2017	10.1016/j.jnc.2017.01.004	This study evaluates the utility of DNA barcoding (mitochondrial cytochrome oxidase subunit I; COI) as a biodiversity and conservation applied tool for identifying fish fauna from the southeastern Mediterranean (the continental coast of Israel), a hot-spot area for biological invasion, also with an eye to establish the foundation for follow-up studies that will use environmental DNA (eDNA) tracks…	Conservation; Dna Barcode; Invasive Species; Mediterranean Fish; Taxonomy; Biodiversity; Biological Invasion; Dna; Invasive Species; Mediterranean Environment; Perciform; Species Conservation; Taxonomy; Israel; Actinopterygii; Apogon Queketti; Champsodon Nudivittis; Cheilodipterus; Dasyatis Pastinaca; Diplodus; Elasmobranchii; Fistularia; Gobiidae; Rhinobatos Rhinobatos; Trachurus	biodiversity; biological invasion; DNA; invasive species; Mediterranean environment; perciform; species conservation; taxonomy; Israel; Actinopterygii; Apogon queketti; Champsodon nudivittis; Cheilodipterus; Dasyatis pastinaca; Diplodus; Elasmobranchii; Fistularia; Gobiidae; Rhinobatos rhinobatos; Trachurus	English	Article	Scopus
Employing DNA barcoding as taxonomy and conservation tools for fish species censuses at the southeastern Mediterranean, a hot-spot area for biological invasion	2017	10.1016/j.jnc.2017.01.004	This study evaluates the utility of DNA barcoding (mitochondrial cytochrome oxidase subunit I; COI) as a biodiversity and conservation applied tool for identifying fish fauna from the southeastern Mediterranean (the continental coast of Israel), a hot-spot area for biological invasion, also with an eye to establish the foundation for follow-up studies that will use environmental DNA (eDNA) tracks…	Mediterranean fish; DNA barcode; Taxonomy; Invasive species; Conservation	POPULATION BIOLOGY; CRYPTIC DIVERSITY; SEA-LEVEL; BIODIVERSITY; UTILITY; GENUS; BIOGEOGRAPHY; PERCIFORMES; EVOLUTION; GENETICS	English	Article	Web of Science
Enabling pinniped conservation by means of non-invasive genetic population analysis	2021	10.1007/s12686-020-01182-4	Conservation and management of protected species, particularly of elusive species such as pinnipeds, is hampered by knowledge gaps. In the case of studies using genetic data these are often attributed to a lack of representative samples. Therefore, there is a pressing need for the development of minimally invasive sampling protocols suitable for genetic analyses of pinnipeds. The present study ev…	Non-invasive; Population genetics; Grey seal; Harbour seal	ENVIRONMENTAL DNA; PHOCA-VITULINA; HARBOR SEALS; AMPLIFICATION; DIET; AGE; PCR; ABUNDANCE; REVEALS; IMPACTS	English	Article	Web of Science
Enhanced biofilm and extracellular matrix production by chronic carriage versus acute isolates of Salmonella Typhi	2021	10.1371/journal.ppat.1009209	Author summary Salmonella Typhi, a human restricted pathogen is the primary etiologic agent of typhoid fever, an acute systemic infection that has a global incidence of 21 million cases annually. Although the acute infection is resolved by antibiotics, 3-5% of individuals develop chronic carriage that is difficult to resolve with antibiotics. A majority of these indivuals serve as reservoirs for …		INTEGRATION HOST FACTOR; DNABII PROTEINS; NONTYPHOIDAL SALMONELLA; ESCHERICHIA-COLI; IDENTIFICATION; DISRUPTION; GALLSTONES; ANTIBODIES; RESISTANCE; CLEARANCE	English	Article	Web of Science
Enhancing African coelacanth monitoring using environmental DNA	2024	10.1098/rsbl.2024.0415	Coelacanths are rare, elusive, ancient lobe-finned fish species, residing in poorly accessible tropical marine caves and requiring close monitoring and protection.Environmental DNA (eDNA) approaches are being increasingly applied in the detection of rare and threatened species.Here we devise an eDNA approach to detect the presence of African coelacanths (Latimeria chalumnae) off the eastern coast…	Coelacanth; Dna Monitoring; Edna; Management; Marine Biodiversity; South Africa; Dna, Environmental; Biodiversity; Dna; Environmental Management; Environmental Protection; Fish; Marine Ecosystem; Monitoring System; Oceanography; Remotely Operated Vehicle; Environmental Dna; Animal; Ecosystem; Endangered Species; Environmental Monitoring; Genetics; Procedures; South Africa; Animals; Dna, Environme…	biodiversity; DNA; environmental management; environmental protection; fish; marine ecosystem; monitoring system; oceanography; remotely operated vehicle; environmental DNA; animal; ecosystem; endangered species; environmental monitoring; genetics; procedures; South Africa; Animals; DNA, Environmental; Ecosystem; Endangered Species; Environmental Monitoring; Fishes	English	Article	Scopus
Enhancing African coelacanth monitoring using environmental DNA	2024	10.1098/rsbl.2024.0415	Coelacanths are rare, elusive, ancient lobe-finned fish species, residing in poorly accessible tropical marine caves and requiring close monitoring and protection. Environmental DNA (eDNA) approaches are being increasingly applied in the detection of rare and threatened species. Here we devise an eDNA approach to detect the presence of African coelacanths (Latimeria chalumnae) off the eastern coa…	eDNA; coelacanth; marine biodiversity; DNA monitoring; management; South Africa	LATIMERIA-CHALUMNAE SMITH; 1ST CAPTURE; PISCES; CONSERVATION; FISH	English	Article	Web of Science
Enhancing African coelacanth monitoring using environmental DNA	2024	10.1098/rsbl.2024.0415						PubMed
Enhancing endangered species monitoring by lowering data entry requirements with imputation techniques as a preprocessing step for the footprint identification technology (FIT)	2024	10.1016/j.ecoinf.2024.102676	Numerous species of Earth's biota are at risk of extinction and wildlife conservation is more important than ever. Reliable baseline data are essential for wildlife management to inform on the numbers and distribution of endangered species. A promising non-invasive and cost-effective method for monitoring endangered species is the Footprint Identification Technology (FIT). It lends itself to both…	Endangered species; Footprint identification technology; Non-invasive monitoring; Imputation; Missing values; Random Forest	TIGERS PANTHERA-TIGRIS; ENVIRONMENTAL DNA; MISSING DATA; CONSERVATION; SEX; VERTEBRATES; IDENTIFY; TRACK	English	Article	Web of Science
Enhancing viral detection in aquaculture water through virus-microplankton associations and plankton net concentration	2024	10.1016/j.aquaculture.2024.741092	Despite the growing emphasis on aquatic disease monitoring via environmental DNA (eDNA) in water samples, detecting low concentrations of viruses in aquatic environments remains challenging. Prior studies demonstrated that plankton act as mechanical vectors for several aquatic viral pathogens but not for the viral hemorrhagic septicemia virus (VHSV). In this study, we aimed to identify the potent…	Viral hemorrhagic septicemia virus (VHSV); Microplankton; Environmental DNA (eDNA); Plankton net; Aquatic disease monitoring	HEMORRHAGIC SEPTICEMIA VIRUS; GENOTYPE IVB; VHSV; TRANSMISSION; SIZE; FISH; LAKE; DNA	English	Article	Web of Science
Entomological authentication of honey based on a DNA method that distinguishes Apis mellifera mitochondrial C mitotypes: Application to honey produced by A. m. ligustica and A. m. carnica	2022	10.1016/j.foodcont.2021.108713	Honey contains DNA of all organisms that directly or indirectly have been involved in its production, including the DNA of the honey bees. Therefore, using DNA extracted from honey, it is possible to analyse DNA markers useful to authenticate its entomological origin. In this study we developed an assay that can distinguish two mitotypes within the mitochondrial C lineage of Apis mellifera: the C…	Authenticity; Environmental Dna; Fraud; Genetic Resource; Honey Bee Subspecies; Mtdna		English	Article	Scopus
Entomological authentication of honey based on a DNA method that distinguishes Apis mellifera mitochondrial C mitotypes: Application to honey produced by A. m. ligustica and A. m. carnica	2022	10.1016/j.foodcont.2021.108713	Honey contains DNA of all organisms that directly or indirectly have been involved in its production, including the DNA of the honey bees. Therefore, using DNA extracted from honey, it is possible to analyse DNA markers useful to authenticate its entomological origin. In this study we developed an assay that can distinguish two mitotypes within the mitochondrial C lineage of Apis mellifera: the C…	Authenticity; Environmental DNA; Fraud; Genetic resource; Honey bee subspecies; mtDNA	MOLECULAR CHARACTERIZATION; PROTECTED POPULATIONS; EUROPEAN HONEY; NATIVE HONEY; ORIGIN; DISCRIMINATION; IDENTIFICATION; CERANA; BIODIVERSITY; TRACEABILITY	English	Article	Web of Science
Environmental DNA - An emerging tool in conservation for monitoring past and present biodiversity	2015	10.1016/j.biocon.2014.11.019	The continuous decline in Earth's biodiversity represents a major crisis and challenge for the 21st century, and there is international political agreement to slow down or halt this decline. The challenge is in large part impeded by the lack of knowledge on the state and distribution of biodiversity - especially since the majority of species on Earth are un-described by science. All conservation …	Biodiversity; Conservation; Dna Metabarcoding; Edna; Environmental Dna; Extinction; Monitoring; Biodiversity; Conservation Genetics; Conservation Planning; Conservation Status; Environmental Monitoring; Genetic Marker; Nucleic Acid Analysis; Population Distribution; Spatiotemporal Analysis; Species Diversity; Taxonomy; Twenty First Century; Animalia	biodiversity; conservation genetics; conservation planning; conservation status; environmental monitoring; genetic marker; nucleic acid analysis; population distribution; spatiotemporal analysis; species diversity; taxonomy; twenty first century; Animalia	English	Review	Scopus
Environmental DNA - An emerging tool in conservation for monitoring past and present biodiversity	2015	10.1016/j.biocon.2014.11.019	The continuous decline in Earth's biodiversity represents a major crisis and challenge for the 21st century, and there is international political agreement to slow down or halt this decline. The challenge is in large part impeded by the lack of knowledge on the state and distribution of biodiversity - especially since the majority of species on Earth are un-described by science. All conservation …	Environmental DNA; eDNA; DNA metabarcoding; Conservation; Biodiversity; Monitoring; Extinction	EXTRACELLULAR DNA; ANCIENT DNA; LAKE-SEDIMENTS; DEEP-SEA; MICROBIAL DIVERSITY; FUNGAL COMMUNITIES; ARCTIC VEGETATION; SPECIES DETECTION; EDNA; PCR	English	Article	Web of Science
Environmental DNA (eDNA) dataset of foraminiferal diversity and distribution from the mining-impacted estuaries of Goa, west coast of India	2024	10.1016/j.dib.2024.110541	The foraminiferal environmental DNA (eDNA) metabarcoding based on high-throughput sequencing (HTS) is a powerful tool to unravel the hidden genetic diversity and environmental lineages. Results from the eDNA approach provided valuable insight into an unplumbed diversity of soft-bodied monothalamous foraminifers [1]. Micropaleontologists overlooked monothalamids due to their soft organic and/or fi…	Coastal India; Environmental Dna; High-throughput Sequencing; Illumina Platform; Metabarcoding; Tropical; Biodiversity; Dna Sequences; Ecosystems; Estuaries; Gene Encoding; Tropics; Coastal India; Environmental Dna; Foraminifers; Genetics Diversities; High-throughput Sequencing; Illumen Platform; Illumina; Metabarcoding; Tropical; West Coast; Dna	Biodiversity; DNA sequences; Ecosystems; Estuaries; Gene encoding; Tropics; Coastal india; Environmental DNA; Foraminifers; Genetics diversities; High-throughput sequencing; Illumen platform; Illumina; Metabarcoding; Tropical; West coast; DNA	English	Article	Scopus
Environmental DNA (eDNA) dataset of foraminiferal diversity and distribution from the mining-impacted estuaries of Goa, west coast of India	2024	10.1016/j.dib.2024.110541	The foraminiferal environmental DNA (eDNA) metabarcoding based on high-throughput sequencing (HTS) is a powerful tool to unravel the hidden genetic diversity and environmental lineages. Results from the eDNA approach provided valuable insight into an unplumbed diversity of soft-bodied monothalamous foraminifers [1] . Micropaleontologists overlooked monothalamids due to their soft organic and/or f…	Metabarcoding; Environmental DNA; High-throughput sequencing; Illumina platform; Tropical; Coastal India	SEA	English	Article	Web of Science
Environmental DNA (eDNA) dataset of foraminiferal diversity and distribution from the mining-impacted estuaries of Goa, west coast of India	2024	10.1016/j.dib.2024.110541						PubMed
Environmental DNA (eDNA) for monitoring marine mammals: Challenges and opportunities	2022	10.3389/fmars.2022.987774	Monitoring marine mammal populations is essential to permit assessment of population status as required by both national and international legislation. Traditional monitoring methods often rely on visual and/or acoustic detections from vessels and aircraft, but limitations including cost, errors in the detection of some species and dependence on taxonomic expertise, as well as good weather and vi…	Assessment; Conservation; Edna; Environmental Dna; Marine Mammals; Monitoring		English	Review	Scopus
Environmental DNA (eDNA) for monitoring marine mammals: Challenges and opportunities	2022	10.3389/fmars.2022.987774	Monitoring marine mammal populations is essential to permit assessment of population status as required by both national and international legislation. Traditional monitoring methods often rely on visual and/or acoustic detections from vessels and aircraft, but limitations including cost, errors in the detection of some species and dependence on taxonomic expertise, as well as good weather and vi…	environmental DNA; eDNA; marine mammals; monitoring; assessment; conservation	CONSERVATION; BIODIVERSITY; DEGRADATION; ABUNDANCE; WHALES; WATERS; TOOL	English	Review	Web of Science
Environmental DNA analysis confirms extant populations of the cryptic Irwin’s turtle within its historical range	2022	10.1186/s12862-022-02009-6	Background: Approximately 50% of freshwater turtles worldwide are currently threatened by habitat loss, rural development and altered stream flows. Paradoxically, reptiles are understudied organisms, with many species lacking basic geographic distribution and abundance data. The iconic Irwin’s turtle, Elseya irwini, belongs to a unique group of Australian endemic freshwater turtles capable of clo…	Catchment-wide Survey; Dam Development; Edna; Elseya Irwini; Monitoring; User-friendly Field Methods; Anthropogenic Effect; Biomonitoring; Catchment; Dna; Endemic Species; Environmental Monitoring; Freshwater Environment; Genetic Analysis; Genetic Variation; Habitat Loss; Population Genetics; Range Size; River Engineering; Rural Development; Sampling; Streamflow; Tributary; Turtle; Australia; Bow…	anthropogenic effect; biomonitoring; catchment; DNA; endemic species; environmental monitoring; freshwater environment; genetic analysis; genetic variation; habitat loss; population genetics; range size; river engineering; rural development; sampling; streamflow; tributary; turtle; Australia; Bowen Basin; Broken River; Burdekin Basin; Queensland; Victoria [Australia]	English	Article	Scopus
Environmental DNA analysis shows high potential as a tool for estimating intraspecific genetic diversity in a wild fish population	2020	10.1111/1755-0998.13165	Environmental DNA (eDNA) analysis has recently been used as a new tool for estimating intraspecific diversity. However, whether known haplotypes contained in a sample can be detected correctly using eDNA-based methods has been examined only by an aquarium experiment. Here, we tested whether the haplotypes of Ayu fish (Plecoglossus altivelis altivelis) detected in a capture survey could also be de…	Environmental Dna; Field Water; Intraspecific Genetic Diversity; Mitochondrial Haplotype; Wild Fish Population; Environmental Dna; Animal; Dna Sequence; Genetic Variation; Genetics; High Throughput Sequencing; Osmeriformes; River; Animals; Environmental Dna; Genetic Variation; High-throughput Nucleotide Sequencing; Rivers; Sequence Analysis, Dna	animal; DNA sequence; genetic variation; genetics; high throughput sequencing; Osmeriformes; river; Animals; Environmental DNA; Genetic Variation; High-Throughput Nucleotide Sequencing; Rivers; Sequence Analysis, DNA	English	Article	Scopus
Environmental DNA analysis shows high potential as a tool for estimating intraspecific genetic diversity in a wild fish population	2020	10.1111/1755-0998.13165	Environmental DNA (eDNA) analysis has recently been used as a new tool for estimating intraspecific diversity. However, whether known haplotypes contained in a sample can be detected correctly using eDNA-based methods has been examined only by an aquarium experiment. Here, we tested whether the haplotypes of Ayu fish (Plecoglossus altivelis altivelis) detected in a capture survey could also be de…	environmental DNA; field water; intraspecific genetic diversity; mitochondrial haplotype; wild fish population		English	Article	Web of Science
Environmental DNA analysis shows high potential as a tool for estimating intraspecific genetic diversity in a wild fish population	2020	10.1111/1755-0998.13165						PubMed
Environmental DNA as a monitoring tool for the endangered freshwater pearl mussel (Margaritifera margaritifera L.): a substitute for classical monitoring approaches?	2016	10.1002/aqc.2611	Knowledge of species distribution is of utmost importance for conservation and management of endangered freshwater mussels. Conventional monitoring approaches are often time consuming and costly. The use of environmental DNA (eDNA) is a relatively new approach and considered as an effective tool to detect the presence of target species in aquatic environments. The aim of this study was to establi…	Bivalves; Conservation; Contamination; Distribution; Edna; Nested Pcr; Survey; Biomonitoring; Bivalve; Dna; Endangered Species; Freshwater Ecosystem; Juvenile; Polymerase Chain Reaction; Population Size; Spatial Distribution; Species Conservation; Bivalvia; Margaritifera Margaritifera	biomonitoring; bivalve; DNA; endangered species; freshwater ecosystem; juvenile; polymerase chain reaction; population size; spatial distribution; species conservation; Bivalvia; Margaritifera margaritifera	English	Article	Scopus
Environmental DNA as a monitoring tool for the endangered freshwater pearl mussel (Margaritifera margaritifera L.): a substitute for classical monitoring approaches?	2016	10.1002/aqc.2611	1. Knowledge of species distribution is of utmost importance for conservation and management of endangered freshwater mussels. Conventional monitoring approaches are often time consuming and costly. The use of environmental DNA (eDNA) is a relatively new approach and considered as an effective tool to detect the presence of target species in aquatic environments. The aim of this study was to esta…	bivalves; eDNA; conservation; contamination; nested PCR; survey; distribution	ANCIENT DNA; CONSERVATION; EDNA; BIVALVIA; ECOLOGY	English	Article	Web of Science
Environmental DNA as a tool for monitoring Antarctic vertebrates	2021	10.1080/03014223.2021.1900299	Antarctica is home to numerous species that are vulnerable to environmental change, and assessing species responses requires long-term monitoring. However, Antarctica’s extreme nature presents limitations to conducting the type of long-term or broad-scale studies necessary for understanding changes in community composition. In this paper, we evaluate the potential for the use of environmental DNA…	Biodiversity; Conservation Genetics; Edna; Environmental Sampling; Genetic Tools; Polar; Remote Sampling; Southern Ocean; Biodiversity; Biomonitoring; Community Composition; Conservation Genetics; Detection Method; Population Genetics; Vertebrate; Antarctica; Varanidae; Vertebrata	biodiversity; biomonitoring; community composition; conservation genetics; detection method; population genetics; vertebrate; Antarctica; Varanidae; Vertebrata	English	Review	Scopus
Environmental DNA as a tool for monitoring Antarctic vertebrates	2021	10.1080/03014223.2021.1900299	Antarctica is home to numerous species that are vulnerable to environmental change, and assessing species responses requires long-term monitoring. However, Antarctica's extreme nature presents limitations to conducting the type of long-term or broad-scale studies necessary for understanding changes in community composition. In this paper, we evaluate the potential for the use of environmental DNA…	eDNA; environmental sampling; genetic tools; Southern Ocean; polar; remote sampling; biodiversity; conservation genetics	KILLER WHALES; WEDDELL SEALS; MCMURDO SOUND; ROSS SEA; POPULATION; SURVIVAL; PATTERNS; SCIENCE; SHELF; DEEP	English	Review	Web of Science
Environmental DNA captures the genetic diversity of bowhead whales (Balaena mysticetus) in West Greenland	2021	10.1002/edn3.176	Environmental changes are prominent in Arctic ecosystems, where the distribution, abundance, life history, and health of marine organisms such as the bowhead whale (Balaena mysticetus) are tightly connected to sea ice and sea temperature. However, due to logistical and other challenges of data collection in the Arctic, appropriate assessments of past, present and future effects of climate change …	Arctic; Climate Change; Edna; Marine Mammal; Mitochondrial Dna; Noninvasive; Population Genetics; Shotgun Sequencing		English	Article	Scopus
Environmental DNA Collected from Snow Tracks is Useful for Identification of Mammalian Species	2019	10.2108/zs180172	Noninvasive genetic analysis is being used increasingly in field surveys. However, detecting large and middle-sized mammals, such as Carnivora species, using noninvasive samples, such as scat or hair, is time-and labor-intensive due to their low densities and elusive behaviors. As snow tracks are the most frequently encountered natural signs of terrestrial mammals in winter, we employed several m…	environmental DNA; mammals; DNA metabarcoding; noninvasive genetic sampling; Sanger sequencing; snow track	MARTEN MARTES-MELAMPUS; POPULATION-SIZE; GENETIC DIVERSITY; AMUR TIGERS; CONSERVATION; FOOTPRINTS; TOOL; CARNIVORA; HISTORY; HAIR	English	Article	Web of Science
Environmental DNA Comparative Phylogeography: Simultaneous Estimation of Population Structures Within a Species-Rich Group of Freshwater Gobies	2025	10.1111/mec.70059	Comparative phylogeography provides crucial insights into evolutionary processes shaping biodiversity patterns by analysing spatial genetic variations across multiple species. However, conventional capture-based methods are often labour-intensive, particularly for multi-species analyses. Environmental DNA (eDNA) analysis has significant advantages in comparative phylogeography, including simplifi…	Edna; Multiple Species; Phylogeographic Pattern; Rhinogobius; Cytochrome B; Cytochromes B; Dna, Environmental; Dna, Mitochondrial; Cytochrome B; Environmental Dna; Fresh Water; Mitochondrial Dna; Animal; Biodiversity; Classification; Dna Sequencing; Genetic Variation; Genetics; Haplotype; High Throughput Sequencing; Japan; Perciformes; Phylogeny; Phylogeography; Population Genetics; Animals; Biod…	cytochrome b; environmental DNA; fresh water; mitochondrial DNA; animal; biodiversity; classification; DNA sequencing; genetic variation; genetics; haplotype; high throughput sequencing; Japan; Perciformes; phylogeny; phylogeography; population genetics; Animals; Biodiversity; Cytochromes b; DNA, Environmental; DNA, Mitochondrial; Fresh Water; Genetic Variation; Genetics, Population; Haplotypes; …	English	Article	Scopus
Environmental DNA Comparative Phylogeography: Simultaneous Estimation of Population Structures Within a Species-Rich Group of Freshwater Gobies	2025	10.1111/mec.70059	Comparative phylogeography provides crucial insights into evolutionary processes shaping biodiversity patterns by analysing spatial genetic variations across multiple species. However, conventional capture-based methods are often labour-intensive, particularly for multi-species analyses. Environmental DNA (eDNA) analysis has significant advantages in comparative phylogeography, including simplifi…	eDNA; multiple species; phylogeographic pattern; Rhinogobius	1859 TELEOSTEI GOBIIDAE; OF-RHINOGOBIUS GILL; FUJIAN PROVINCE; LIFE-HISTORY; GOBY; DISPERSAL; DIVERGENCE; SUCCESS; SAMPLES; BASIN	English	Article	Web of Science
Environmental DNA Comparative Phylogeography: Simultaneous Estimation of Population Structures Within a Species-Rich Group of Freshwater Gobies	2025	10.1111/mec.70059						PubMed
Environmental DNA concentrations vary greatly across productive and degradative conditions, with implications for the precision of population estimates	2024	10.1038/s41598-024-66732-4	Population size is an important metric to inform the conservation and management of species. For aquatic species, environmental DNA (eDNA) concentration has been suggested for non-invasively estimating population size. However, many biotic and abiotic factors simultaneously influence the production and degradation of eDNA which can alter the relationship between population size and eDNA concentra…	Dna, Environmental; Environmental Dna; Animal; Genetics; Larva; Population Density; Ranavirus; Salinity; Temperature; Virology; Animals; Dna, Environmental; Larva; Population Density; Salinity; Temperature	environmental DNA; animal; genetics; larva; population density; Ranavirus; salinity; temperature; virology; Animals; DNA, Environmental; Larva; Population Density; Salinity; Temperature	English	Article	Scopus
Environmental DNA concentrations vary greatly across productive and degradative conditions, with implications for the precision of population estimates	2024	10.1038/s41598-024-66732-4	Population size is an important metric to inform the conservation and management of species. For aquatic species, environmental DNA (eDNA) concentration has been suggested for non-invasively estimating population size. However, many biotic and abiotic factors simultaneously influence the production and degradation of eDNA which can alter the relationship between population size and eDNA concentra…		ROAD DEICING SALT; EDNA; TEMPERATURE; QUANTIFICATION; ABUNDANCE; IMPACTS; BIOMASS; FROGS; RATES; PONDS	English	Article	Web of Science
Environmental DNA concentrations vary greatly across productive and degradative conditions, with implications for the precision of population estimates	2024	10.1038/s41598-024-66732-4						PubMed
Environmental DNA detects biodiversity and ecological features of phytoplankton communities in Mediterranean transitional waters	2023	10.1038/s41598-023-42389-3	Climate changes and anthropogenic pressures are causing a biodiversity decline in terms of species number and genetic diversity, reducing the adaptability and evolvability of natural communities. Transitional water ecosystems are more sensitive to habitat reduction and degradation and, thus, are more exposed to biodiversity declines requiring biodiversity monitoring programs for their conservatio…	Water; Dna, Environmental; Water; Environmental Dna; Water; Biodiversity; Ecosystem; Genetics; Phytoplankton; Biodiversity; Dna, Environmental; Ecosystem; Phytoplankton; Water	environmental DNA; water; biodiversity; ecosystem; genetics; phytoplankton; Biodiversity; DNA, Environmental; Ecosystem; Phytoplankton; Water	English	Article	Scopus
Environmental DNA detects biodiversity and ecological features of phytoplankton communities in Mediterranean transitional waters	2023	10.1038/s41598-023-42389-3	Climate changes and anthropogenic pressures are causing a biodiversity decline in terms of species number and genetic diversity, reducing the adaptability and evolvability of natural communities. Transitional water ecosystems are more sensitive to habitat reduction and degradation and, thus, are more exposed to biodiversity declines requiring biodiversity monitoring programs for their conservatio…		CLIMATE-CHANGE; DIVERSITY	English	Article	Web of Science
Environmental DNA detects biodiversity and ecological features of phytoplankton communities in Mediterranean transitional waters	2023	10.1038/s41598-023-42389-3						PubMed
Environmental DNA facilitates accurate, inexpensive, and multiyear population estimates of millions of anadromous fish	2020	10.1111/1755-0998.13123	Although environmental DNA shed from an organism is now widely used for species detection in a wide variety of contexts, mobilizing environmental DNA for management requires estimation of population size and trends in addition to assessing presence or absence. However, the efficacy of environmental-DNA-based indices of abundance for long-term population monitoring have not yet been assessed. Here…	Alaska; Anadromous; Edna; Eulachon; Fisheries; Thaleichthys Pacificus; Tlingit; Environmental Dna; Animal; Chemistry; Classification; Economics; Female; Genetics; Genomics; Male; Osmeriformes; Population Density; Procedures; River; Animals; Environmental Dna; Female; Genomics; Male; Population Density; Rivers	animal; chemistry; classification; economics; female; genetics; genomics; male; Osmeriformes; population density; procedures; river; Animals; Environmental DNA; Female; Genomics; Male; Population Density; Rivers	English	Article	Scopus
Environmental DNA facilitates accurate, inexpensive, and multiyear population estimates of millions of anadromous fish	2020	10.1111/1755-0998.13123	Although environmental DNA shed from an organism is now widely used for species detection in a wide variety of contexts, mobilizing environmental DNA for management requires estimation of population size and trends in addition to assessing presence or absence. However, the efficacy of environmental-DNA-based indices of abundance for long-term population monitoring have not yet been assessed. Here…	Alaska; anadromous; eDNA; eulachon; fisheries; Thaleichthys pacificus; Tlingit	EULACHON; EDNA; RARE	English	Article	Web of Science
Environmental DNA facilitates accurate, inexpensive, and multiyear population estimates of millions of anadromous fish	2020	10.1111/1755-0998.13123						PubMed
Environmental DNA for Assessing Population and Spatial Distribution of Spinibarbus caldwelli in the Liuxi River	2025	10.3390/d17050320	The wild resources of Spinibarbus caldwelli, once an important economic fish in southern China, have been drastically reduced in recent years due to environmental changes and human activities. The Liuxi River S. caldwelli National Aquatic Germplasm Reserve was established in Conghua District, Guangzhou city, and the release of S. caldwelli was carried out. However, traditional fishery resource su…	Abundance; Biomass; Diffusion; Edna; Monitoring Of Aquatic Species; Accuracy Assessment; Cyprinid; Detection Method; Dna; Environmental Change; Environmental Conditions; Fishery Economics; Fishery Production; Germplasm; Human Activity; Lotic Environment; Nondestructive Testing; Population Genetics; Spatial Distribution; Wild Population; China; Conghua; Guangdong; Liuxi River	accuracy assessment; cyprinid; detection method; DNA; environmental change; environmental conditions; fishery economics; fishery production; germplasm; human activity; lotic environment; nondestructive testing; population genetics; spatial distribution; wild population; China; Conghua; Guangdong; Liuxi River	English	Article	Scopus
Environmental DNA for Observing Marine Mammals in the Marine Protected Areas of Iroise and the Antilles	2024	10.1002/9781394316946.ch5	For decades, not a year has gone by without scientific research results shedding new light on the evolution of the cetaceans, the complexity of their social organization, their behaviors, and the diversity demonstrated within the species. Whilst the ban on industrial whaling is largely respected, global change and local human activities have taken over and had a catastrophic impact on the marine …	Cetaceans; Dna Analysis; Edna Analysis; Genetic Diversity; Marine Mammals; Metabarcoding; Social Organization		English	Book chapter	Scopus
Environmental DNA for the enumeration and management of Pacific salmon	2019	10.1111/1755-0998.12987	Pacific salmon are a keystone resource in Alaska, generating annual revenues of well over ~US$500 million/year. Due to their anadromous life history, adult spawners distribute amongst thousands of streams, posing a huge management challenge. Currently, spawners are enumerated at just a few streams because of reliance on human counters and, rarely, sonar. The ability to detect organisms by shed ti…	Ecosystem Functions; Ecosystem Services; Environmental Dna; Fisheries Management; Oncorhynchus; Qpcr; Southeast Alaska; Dna; Water; Dna; Water; Dna; Water; Alaska; Animal; Chemistry; Genetics; Genomics; Growth, Development And Aging; Isolation And Purification; Population Density; Population Genetics; Procedures; Salmonine; Animals; Genetics, Population; Genomics; Population Density; Salmon; Water	DNA; water; Alaska; animal; chemistry; genetics; genomics; growth, development and aging; isolation and purification; population density; population genetics; procedures; salmonine; Animals; Genetics, Population; Genomics; Population Density; Salmon; Water	English	Article	Scopus
Environmental DNA from archived leaves reveals widespread temporal turnover and biotic homogenization in forest arthropod communities	2022	10.7554/eLife.78521	A major limitation of current reports on insect declines is the lack of standardized, long-term, and taxonomically broad time series. Here, we demonstrate the utility of environmental DNA from archived leaf material to characterize plant-associated arthropod communities. We base our work on several multi-decadal leaf time series from tree canopies in four land use types, which were sampled as par…	Magnesium Sulfate; Dna, Environmental; Environmental Dna; Magnesium Sulfate; Actinobacteria; Arthropod Community; Article; Canopy; Chicken; Copy Number Variation; Dna Extraction; Environmental Monitoring; Forest; Genetic Variability; Genetic Variation; Haplotype; Land Use; Mass Spectrometry; Microbial Community; Microbial Diversity; Nonhuman; Parasitoid; Plant Gene; Plant Leaf; Principal Coordina…	environmental DNA; magnesium sulfate; Actinobacteria; arthropod community; Article; canopy; chicken; copy number variation; DNA extraction; environmental monitoring; forest; genetic variability; genetic variation; haplotype; land use; mass spectrometry; microbial community; microbial diversity; nonhuman; parasitoid; plant gene; plant leaf; principal coordinate analysis; real time polymerase chain…	English	Article	Scopus
Environmental DNA from avian residual saliva in fruits and its potential uses in population genetics	2020	10.1007/s12686-018-1074-4	Buccal cells are a valid source of vertebrate DNA for genetic analysis, typically collected with mouth swabs on captured individuals. Yet, advances in DNA storage and processing now permit recovering genomic material from traces of saliva in food remains. For example, the feeding habits of canopy-dwelling frugivorous birds, e.g. large macaws (Psittaciformes), could present an ideal opportunity to…	Genetic Analysis; Non-invasive; Pcr; Psittacidae; Swab		English	Article	Scopus
Environmental DNA from avian residual saliva in fruits and its potential uses in population genetics	2020	10.1007/s12686-018-1074-4	Buccal cells are a valid source of vertebrate DNA for genetic analysis, typically collected with mouth swabs on captured individuals. Yet, advances in DNA storage and processing now permit recovering genomic material from traces of saliva in food remains. For example, the feeding habits of canopy-dwelling frugivorous birds, e.g. large macaws (Psittaciformes), could present an ideal opportunity to…	Psittacidae; Swab; Non-invasive; Genetic analysis; PCR	MACAWS ARA-MACAO; SEX IDENTIFICATION; BUCCAL SWABS; MICROSATELLITE MARKERS; A-CHLOROPTERUS; SCARLET MACAW; EXTRACTION; FEATHERS; BEHAVIOR; SCALE	English	Article	Web of Science
Environmental DNA from residual saliva for efficient noninvasive genetic monitoring of brown bears (Ursus arctos)	2016	10.1371/journal.pone.0165259	Noninvasive genetic sampling is an important tool in wildlife ecology and management, typically relying on hair snaring or scat sampling techniques, but hair snaring is labor and cost intensive, and scats yield relatively low quality DNA. New approaches utilizing environmental DNA (eDNA) may provide supplementary, cost-effective tools for noninvasive genetic sampling. We tested whether eDNA from …	Dna; Dna; Dna; Environmental Dna; Unclassified Drug; Adult; Alaska; Article; Brown Bear; Controlled Study; Cost Effectiveness Analysis; Dna Determination; Dna Quality; Female; Limit Of Quantitation; Male; Nonhuman; Population Biology; Population Genetics; Saliva Analysis; Animal; Bear; Chemistry; Classification; Devices; Dna Sequence; Economics; Environment; Genetics; Genotype; Geography; Isolati…	DNA; environmental DNA; unclassified drug; adult; Alaska; Article; brown bear; controlled study; cost effectiveness analysis; DNA determination; DNA quality; female; limit of quantitation; male; nonhuman; population biology; population genetics; saliva analysis; animal; bear; chemistry; classification; devices; DNA sequence; economics; environment; genetics; genotype; geography; isolation and pur…	English	Article	Scopus
Environmental DNA genetic monitoring of the nuisance freshwater diatom, Didymosphenia geminata, in eastern North American streams	2017	10.1111/ddi.12536	Aim: Establishing the distribution and diversity of populations in the early stages of invasion when populations are at low abundance is a core challenge for conservation biologists. Recently, genetic monitoring for environmental DNA (eDNA) has become an effective approach for the early detection of invaders, especially for microscopic organisms where visual detection is challenging. Didymospheni…	Diatom; Didymo; Environmental Dna; Genetic Diversity; Harmful Algal Blooms; Invasive Species; Algal Bloom; Diatom; Freshwater Ecosystem; Genetic Analysis; Invasive Species; Mitochondrial Dna; Monitoring System; Spatial Distribution; Streamwater; Mid-atlantic States; North America; United States; Algae; Bacillariophyta; Didymosphenia Geminata	algal bloom; diatom; freshwater ecosystem; genetic analysis; invasive species; mitochondrial DNA; monitoring system; spatial distribution; streamwater; Mid-Atlantic States; North America; United States; algae; Bacillariophyta; Didymosphenia geminata	English	Article	Scopus
Environmental DNA genetic monitoring of the nuisance freshwater diatom, Didymosphenia geminata, in eastern North American streams	2017	10.1111/ddi.12536	Aim Establishing the distribution and diversity of populations in the early stages of invasion when populations are at low abundance is a core challenge for conservation biologists. Recently, genetic monitoring for environmental DNA (eDNA) has become an effective approach for the early detection of invaders, especially for microscopic organisms where visual detection is challenging. Didymosphenia…	diatom; Didymo; environmental DNA; genetic diversity; harmful algal blooms; invasive species	BENTHIC COMMUNITIES; MICROORGANISMS; MANAGEMENT; DIVERSITY; PATTERNS; ENDEMISM; ECOLOGY; SCIENCE; POLICY	English	Article	Web of Science
Environmental DNA Haplotyping Reveals Dispersal Patterns of Invasive Bluegill Sunfish, Lepomis macrochirus, in Japan	2025	10.1002/edn3.70055	Biological invasions represent a significant threat to global biodiversity. Population genetics plays a crucial role in addressing the invasion history of invasive species, as information on the genetic structure of local populations of invasive species is useful in estimating their source and dispersal. This study aimed to demonstrate the potential of an environmental DNA (eDNA)-based approach f…	Biological Invasions; Edna; Genetic Diversity; Haplotype; Invasive Species		English	Article	Scopus
Environmental DNA Haplotyping Reveals Dispersal Patterns of Invasive Bluegill Sunfish, Lepomis macrochirus, in Japan	2025	10.1002/edn3.70055	Biological invasions represent a significant threat to global biodiversity. Population genetics plays a crucial role in addressing the invasion history of invasive species, as information on the genetic structure of local populations of invasive species is useful in estimating their source and dispersal. This study aimed to demonstrate the potential of an environmental DNA (eDNA)-based approach f…	biological invasions; eDNA; genetic diversity; haplotype; invasive species	GENETIC DIVERSITY; SAMPLES	English	Article	Web of Science
Environmental DNA identifies coastal plant community shift 1,000 years ago in Torrens Island, South Australia	2024	10.1038/s43247-024-01277-y	Anthropogenic activities are causing detrimental changes to coastal plants– namely seagrass, mangrove, and tidal marshes. Looking beyond recent times to past vegetation dynamics is critical to assess the response and resilience of an environment to change. Here, we develop a high-resolution multi-proxy approach, providing a new evidence base to decipher long-term change in coastal plant communiti…	Dna; Ecosystem Approach; Environmental Management; Plant Community; Population Genetics; Spatial Resolution; Vegetation Dynamics; Australia; South Australia; Torrens River	DNA; ecosystem approach; environmental management; plant community; population genetics; spatial resolution; vegetation dynamics; Australia; South Australia; Torrens River	English	Article	Scopus
Environmental DNA in lake sediment reveals biogeography of native genetic diversity	2019	10.1002/fee.2073	Understanding the historical distributions of species is vital to the conservation and restoration of native species, yet such information is often qualitative. We show that the paleolimnological history of threatened freshwater fishes can be reconstructed using species-diagnostic markers amplified from environmental DNA deposited in lake sediments (lake sedDNA). This method was validated through…	Biogeography; Colonization; Conservation Status; Dna; Fish; Freshwater Ecosystem; Genetic Variation; Historical Record; Lacustrine Deposit; Native Species; Watershed; Oncorhynchus Clarkii; Oncorhynchus Clarkii Bouvieri; Oncorhynchus Clarkii Lewisi; Pisces; Salmonidae	biogeography; colonization; conservation status; DNA; fish; freshwater ecosystem; genetic variation; historical record; lacustrine deposit; native species; watershed; Oncorhynchus clarkii; Oncorhynchus clarkii bouvieri; Oncorhynchus clarkii lewisi; Pisces; Salmonidae	English	Article	Scopus
Environmental DNA in lake sediment reveals biogeography of native genetic diversity	2019	10.1002/fee.2073	Understanding the historical distributions of species is vital to the conservation and restoration of native species, yet such information is often qualitative. We show that the paleolimnological history of threatened freshwater fishes can be reconstructed using species-diagnostic markers amplified from environmental DNA deposited in lake sediments (lake sedDNA). This method was validated through…		WESTSLOPE CUTTHROAT TROUT; CONSERVATION; HYBRIDIZATION; POPULATIONS; RESCUE	English	Article	Web of Science
Environmental DNA metabarcoding of water samples as a tool for monitoring Iberian freshwater fish composition	2023	10.1371/journal.pone.0283088	Environmental DNA (eDNA) metabarcoding has been increasingly used to monitor the community assemblages of a wide variety of organisms. Here, we test the efficacy of eDNA metabarcoding to assess the composition of Iberian freshwater fishes, one of the most endangered groups of vertebrates in Spain. For this purpose, we sampled 12 sampling sites throughout one of Spain’s largest basins, the Duero, …	Water; Dna, Environmental; Water; Environmental Dna; Mitochondrial Dna; Reactive Oxygen Metabolite; River Water; Rna 12s; Fresh Water; Water; Aquatic Environment; Article; Autumn; Bacteroidetes; Biogeography; Bioinformatics; Dna Barcoding; Dna Extraction; Dna Sequence; Freshwater Fish; Genetic Database; Genetic Marker; Genetic Variability; Geographic Distribution; Haplotype; Introduced Species; I…	environmental DNA; mitochondrial DNA; reactive oxygen metabolite; river water; RNA 12S; fresh water; water; aquatic environment; Article; autumn; Bacteroidetes; biogeography; bioinformatics; DNA barcoding; DNA extraction; DNA sequence; freshwater fish; genetic database; genetic marker; genetic variability; geographic distribution; haplotype; introduced species; invasive species; molecular genetic…	English	Article	Scopus
Environmental DNA metabarcoding read numbers and their variability predict species abundance, but weakly in non-dominant species	2023	10.1002/edn3.355	Metabarcoding of environmental DNA (eDNA) provides more comprehensive, efficient, and non-invasive sampling of biological communities than conventional methods. However, limitations of metabarcoding include taxon-specific biases in amplification and sequencing that distort assessments of community composition. Further, hyper-abundant species may disproportionately affect community composition ass…	Abundance; Amplicon Sequence Variants (asvs); Biosurveillance; Cichlid Species; Exact Amplicon Sequence Inference Approaches; Illumina Novaseq; Invasive Species Eradication; Mifish; Population Genetics Haplotype Diversity		English	Article	Scopus
Environmental DNA metabarcoding read numbers and their variability predict species abundance, but weakly in non-dominant species	2023	10.1002/edn3.355	Metabarcoding of environmental DNA (eDNA) provides more comprehensive, efficient, and non-invasive sampling of biological communities than conventional methods. However, limitations of metabarcoding include taxon-specific biases in amplification and sequencing that distort assessments of community composition. Further, hyper-abundant species may disproportionately affect community composition ass…	abundance; amplicon sequence variants (ASVs); biosurveillance; cichlid species; exact amplicon sequence inference approaches; Illumina NovaSeq; invasive species eradication; MiFish; population genetics haplotype diversity		English	Article	Web of Science
Environmental DNA metabarcoding reveals winners and losers of global change in coastal waters: EDNA and climate change	2020	10.1098/rspb.2020.2424	Studies of the ecological effects of global change often focus on one or a few species at a time. Consequently, we know relatively little about the changes underway at real-world scales of biological communities, which typically have hundreds or thousands of interacting species. Here, we use COI mtDNA amplicons from monthly samples of environmental DNA to survey 221 planktonic taxa along a gradie…	Climate Change; Ecosystem Response; Environmental Dna; Metabarcoding; Ocean Acidification; Carbonic Acid; Carbonates; Environmental Dna; Climate Change; Coastal Zone; Dinoflagellate; Dna; Ecosystem Dynamics; Environmental Conditions; Global Change; Mitochondrial Dna; Ocean Acidification; Population Genetics; Species Diversity; Alexandrium; Bacillariophyta; Dinophyceae; Emiliania Huxleyi; Carbonic…	climate change; coastal zone; dinoflagellate; DNA; ecosystem dynamics; environmental conditions; global change; mitochondrial DNA; ocean acidification; population genetics; species diversity; Alexandrium; Bacillariophyta; Dinophyceae; Emiliania huxleyi; carbonic acid; sea water; aquatic species; biota; diatom; DNA barcoding; ecosystem; Haptophyta; pH; physiology; plankton; salinity; temperature; …	English	Article	Scopus
Environmental DNA monitoring method of the commercially important and endangered fish Gnathopogon caerulescens	2022	10.1007/s10201-021-00665-z	Gnathopogon caerulescens is an endangered but commercially important fish in Lake Biwa, Japan. The population size of G. caerulescens has drastically reduced in the past decades, and there is a strong need to develop effective resource management frameworks for the sustainable use of this species. In the management of endangered species, it is important to monitor and grasp their distribution and…	Edna; Honmoroko; Lake Biwa; Real-time Pcr; Taqman Mgb Probe; Abundance; Cyprinid; Dna; Endangered Species; Environmental Monitoring; Polymerase Chain Reaction; Population Distribution; Population Size; Biwa Lake; Honshu; Japan; Kinki; Shiga	abundance; cyprinid; DNA; endangered species; environmental monitoring; polymerase chain reaction; population distribution; population size; Biwa Lake; Honshu; Japan; Kinki; Shiga	English	Article	Scopus
Environmental DNA monitoring method of the commercially important and endangered fish Gnathopogon caerulescens	2022	10.1007/s10201-021-00665-z	Gnathopogon caerulescens is an endangered but commercially important fish in Lake Biwa, Japan. The population size of G. caerulescens has drastically reduced in the past decades, and there is a strong need to develop effective resource management frameworks for the sustainable use of this species. In the management of endangered species, it is important to monitor and grasp their distribution and…	eDNA; Honmoroko; Lake Biwa; TaqMan MGB probe; Real-time PCR	CONSERVATION	English	Article	Web of Science
Environmental DNA monitoring: Beware of the transition to more sensitive typing methodologies	2013	10.1080/00450618.2013.788683	Background DNA on surfaces and equipment utilised during forensic examination of exhibits poses a contamination risk. Many laboratories have established environmental DNA monitoring (EDM) programmes to generate awareness of locations, levels and origins of background DNA to identify contamination risk reduction opportunities. To evaluate the impact on contamination risk of introducing new DNA pro…	Contamination; Dna; Environmental Monitoring; Forensics; Dna; Dna; Allele; Cleaning; Conference Paper; Dna Contamination; Dna Fingerprinting; Environmental Monitoring; Risk Reduction	DNA; allele; cleaning; conference paper; DNA contamination; DNA fingerprinting; environmental monitoring; risk reduction	English	Article	Scopus
Environmental DNA monitoring: beware of the transition to more sensitive typing methodologies	2013	10.1080/00450618.2013.788683	Background DNA on surfaces and equipment utilised during forensic examination of exhibits poses a contamination risk. Many laboratories have established environmental DNA monitoring (EDM) programmes to generate awareness of locations, levels and origins of background DNA to identify contamination risk reduction opportunities. To evaluate the impact on contamination risk of introducing new DNA pro…	environmental monitoring; forensics; contamination; DNA	PCR CONTAMINATION; IRRADIATION; SURFACES	English	Article	Web of Science
Environmental DNA phylogeography: Successful reconstruction of phylogeographic patterns of multiple fish species from cups of water	2023	10.1111/1755-0998.13772	Phylogeography is an integrative field of science linking micro- and macro-evolutionary processes, contributing to the inference of vicariance, dispersal, speciation, and other population-level processes. Phylogeographic surveys usually require considerable effort and time to obtain numerous samples from many geographical sites covering the distribution range of target species; this associated hi…	Comparative Phylogeography; Environmental Dna; Freshwater Fish; Water; Dna, Environmental; Water; Environmental Dna; Water; Animal; Biodiversity; Dna Barcoding; Environmental Monitoring; Fish; Genetics; Phylogeny; Phylogeography; Procedures; Animals; Biodiversity; Dna Barcoding, Taxonomic; Dna, Environmental; Environmental Monitoring; Fishes; Phylogeny; Phylogeography; Water	environmental DNA; water; animal; biodiversity; DNA barcoding; environmental monitoring; fish; genetics; phylogeny; phylogeography; procedures; Animals; Biodiversity; DNA Barcoding, Taxonomic; DNA, Environmental; Environmental Monitoring; Fishes; Phylogeny; Phylogeography; Water	English	Article	Scopus
Environmental DNA phylogeography: Successful reconstruction of phylogeographic patterns of multiple fish species from cups of water	2023	10.1111/1755-0998.13772	Phylogeography is an integrative field of science linking micro- and macro-evolutionary processes, contributing to the inference of vicariance, dispersal, speciation, and other population-level processes. Phylogeographic surveys usually require considerable effort and time to obtain numerous samples from many geographical sites covering the distribution range of target species; this associated hi…	comparative phylogeography; environmental DNA; freshwater fish	GENETIC POPULATION-STRUCTURE; MITOCHONDRIAL; CONSERVATION; CYPRINIDAE; DIVERGENCE; DIVERSITY; HISTORY; SAMPLES; JAPAN; GOBY	English	Article	Web of Science
Environmental DNA phylogeography: Successful reconstruction of phylogeographic patterns of multiple fish species from cups of water	2023	10.1111/1755-0998.13772					Article	PubMed
Environmental DNA quantification in a spatial and temporal context: a case study examining the removal of brook trout from a high alpine basin	2018	10.1007/s10201-018-0551-5	Analysis of aquatic environmental DNA (eDNA) is a promising tool to determine species distribution, abundance, and biomass. Understanding how the amount of eDNA collected is affected by spatial and temporal processes needs to become better understood before eDNA quantification can be used in species management. In this study, we analyzed how the amount of eDNA changed across space and time in a h…	Aquatic Restoration; Environmental Dna; Quantitative Pcr; Water Sampling; Alpine Environment; Aquatic Ecosystem; Dna; Polymerase Chain Reaction; Removal Experiment; Restoration Ecology; Salmonid; Sampling; Spatiotemporal Analysis; Salmonidae; Salvelinus Fontinalis	alpine environment; aquatic ecosystem; DNA; polymerase chain reaction; removal experiment; restoration ecology; salmonid; sampling; spatiotemporal analysis; Salmonidae; Salvelinus fontinalis	English	Article	Scopus
Environmental DNA quantification in a spatial and temporal context: a case study examining the removal of brook trout from a high alpine basin	2018	10.1007/s10201-018-0551-5	Analysis of aquatic environmental DNA (eDNA) is a promising tool to determine species distribution, abundance, and biomass. Understanding how the amount of eDNA collected is affected by spatial and temporal processes needs to become better understood before eDNA quantification can be used in species management. In this study, we analyzed how the amount of eDNA changed across space and time in a h…	Aquatic restoration; Environmental DNA; Quantitative PCR; Water sampling	SIERRA-NEVADA LAKES; FISH INTRODUCTIONS; MONITORING PROGRAM; MOUNTAIN LAKES; WATER SAMPLES; EDNA; SENSITIVITY; CALIFORNIA; ABUNDANCE	English	Article	Web of Science
Environmental DNA reflects common haplotypic variation	2023	10.1002/edn3.352	Analysis of environmental DNA (eDNA) has gained widespread usage for taxonomically based biodiversity assessment. While interest in applying noninvasive eDNA monitoring for population genetic assessments has grown, its usage in this sphere remains limited. One barrier to uptake is that the effectiveness of eDNA detection below the species level remains to be determined for multiple species and en…	Conservation Of Natural Resources; Fisheries; Genetic Diversity; Haliotis Iris; Population Genetics		English	Article	Scopus
Environmental DNA reflects common haplotypic variation	2023	10.1002/edn3.352	Analysis of environmental DNA (eDNA) has gained widespread usage for taxonomically based biodiversity assessment. While interest in applying noninvasive eDNA monitoring for population genetic assessments has grown, its usage in this sphere remains limited. One barrier to uptake is that the effectiveness of eDNA detection below the species level remains to be determined for multiple species and en…	conservation of natural resources; fisheries; genetic diversity; Haliotis iris; population genetics	ABALONE; EDNA; FISHERIES; PEOPLE; ZEBRA; DIET	English	Article	Web of Science
Environmental DNA reveals seasonal shifts and potential interactions in a marine community	2020	10.1038/s41467-019-14105-1	Environmental DNA (eDNA) analysis allows the simultaneous examination of organisms across multiple trophic levels and domains of life, providing critical information about the complex biotic interactions related to ecosystem change. Here we used multilocus amplicon sequencing of eDNA to survey biodiversity from an eighteen-month (2015–2016) time-series of seawater samples from Monterey Bay, Calif…	Chlorophyll A; Dna; Nitrate; Environmental Dna; Chlorophyll A; Dissolved Oxygen; Dna; Environmental Dna; Environmental Marker; Genomic Dna; Nitrate; Sea Water; Transcriptome; Unclassified Drug; Biodiversity; Community Dynamics; Ecosystem Dynamics; Marine Ecosystem; Network Analysis; Seawater; Time Series Analysis; Trophic Level; Article; Balaenopteridae; Bioinformatics; Community Structure; Contr…	chlorophyll a; dissolved oxygen; DNA; environmental DNA; environmental marker; genomic DNA; nitrate; sea water; transcriptome; unclassified drug; biodiversity; community dynamics; ecosystem dynamics; marine ecosystem; network analysis; seawater; time series analysis; trophic level; Article; Balaenopteridae; bioinformatics; community structure; controlled study; decontamination; DNA barcoding; DNA…	English	Article	Scopus
Environmental DNA reveals the genetic diversity and population structure of an invasive species in the Laurentian Great Lakes	2023	10.1073/pnas.2307345120	Environmental DNA (eDNA) has been established as a noninvasive and efficient approach to sample genetic material from aquatic environments. Although most commonly used to determine species presence and measure biodiversity, eDNA approaches also hold great potential to obtain population-level genetic information from water samples. In this study, we sequenced a panel of multiallelic microsatellite…	Biodiversity; Metabarcoding; Nuclear Edna; Population Genetics; Water; Dna, Environmental; Water; Environmental Dna; Mitochondrial Dna; Water; Allele; Animal Tissue; Aquatic Species; Article; Biodiversity; Bioinformatics; Cell Nucleus; Concentration (parameter); Controlled Study; Dna Extraction; Dna Sequence; Environmental Management; Environmental Monitoring; Fish; Gene Frequency; Genetic Differ…	environmental DNA; mitochondrial DNA; water; allele; animal tissue; aquatic species; Article; biodiversity; bioinformatics; cell nucleus; concentration (parameter); controlled study; DNA extraction; DNA sequence; environmental management; environmental monitoring; fish; gene frequency; genetic difference; genetic variability; genotype; intraspecific diversity; invasive species; lake; Laurentian G…	English	Article	Scopus
Environmental DNA reveals the genetic diversity and population structure of an invasive species in the Laurentian Great Lakes	2023	10.1073/pnas.2307345120	Environmental DNA (eDNA) has been established as a noninvasive and efficient approach to sample genetic material from aquatic environments. Although most commonly used to determine species presence and measure biodiversity, eDNA approaches also hold great potential to obtain population -level genetic information from water samples. In this study, we sequenced a panel of multiallelic microsatellit…	nuclear eDNA; biodiversity; population genetics; metabarcoding	ROUND GOBY; PACKAGE; INFERENCE; POLICY; SPREAD	English	Article	Web of Science
Environmental DNA reveals the genetic diversity and population structure of an invasive species in the Laurentian Great Lakes	2023	10.1073/pnas.2307345120						PubMed
Environmental DNA storage and extraction method affects detectability for multiple aquatic invasive species	2024	10.1002/edn3.557	Environmental DNA (eDNA) refers to genetic material released by organisms into their surrounding environment. Collecting and identifying eDNA has gained popularity for monitoring and surveillance of aquatic invasive species. Invasive species management is most successful when an invasion is identified early while population size is likely to be low, highlighting the importance of eDNA detection s…	Edna; Lakes; Minnesota; Rusty Crayfish; Spiny Water Flea; Zebra Mussel		English	Article	Scopus
Environmental DNA storage and extraction method affects detectability for multiple aquatic invasive species	2024	10.1002/edn3.557	Environmental DNA (eDNA) refers to genetic material released by organisms into their surrounding environment. Collecting and identifying eDNA has gained popularity for monitoring and surveillance of aquatic invasive species. Invasive species management is most successful when an invasion is identified early while population size is likely to be low, highlighting the importance of eDNA detection s…	eDNA; lakes; Minnesota; rusty crayfish; spiny water flea; zebra mussel	ROOM-TEMPERATURE PRESERVATION; BYTHOTREPHES-LONGIMANUS; EDNA; CRAYFISH; CAPTURE; BIODIVERSITY; METAANALYSIS; ABUNDANCE; IMPACTS; MUSSEL	English	Article	Web of Science
Environmental DNA to track endangered Gobiobotia naktongensis: Assessment of distribution and habitat requirements	2025	10.1016/j.scitotenv.2024.178125	Because of their noninvasive nature and high detection sensitivity, eDNA-based aquatic ecosystem surveys are useful for monitoring rare, elusive indicator species. Advancements in statistical techniques have expanded their use beyond simple population tracking to predict potential habitats based on the environmental conditions of sites detected eDNA. This study used species-specific molecular mar…	Detection Probability; Flagship Fish; Logistic Regression; Metamds; Species-specific Molecular Marker; Targeted Qpcr; Chlorophyll A; Nitrogen; Dna, Environmental; Abiotic; Biotic; Invertebrates; Logistic Regression; Plant Diseases; Detection Probabilities; Detection Sensitivity; Flagship Fish; Logistics Regressions; Metamd; Molecular Marker; Population Sizes; Species Specifics; Species-specific M…	Abiotic; Biotic; Invertebrates; Logistic regression; Plant diseases; Detection probabilities; Detection sensitivity; Flagship fish; Logistics regressions; Metamd; Molecular marker; Population sizes; Species specifics; Species-specific molecular marker; Targeted qPCR; Anthropogenic; chlorophyll a; environmental DNA; nitrogen; burrowing organism; cyprinid; dam construction; DNA; endangered species;…	English	Article	Scopus
Environmental DNA to track endangered Gobiobotia naktongensis: Assessment of distribution and habitat requirements	2025	10.1016/j.scitotenv.2024.178125						PubMed
Environmental DNA unveils deep phylogeographic structure of a freshwater fish	2024	10.1111/mec.17337	Phylogeography bears an important part in ecology and evolution. However, current phylogeographic studies are largely constrained by limited numbers of individual samples. Using an environmental DNA (eDNA) assay for phylogeographic analyses, this study provides detailed information regarding the history of Siberian stone loach Barbatula toni, a primary freshwater fish across the whole range of Ho…	Environmental Dna; Freshwater Fish; Haplotypes; Phylogeography; Dna, Environmental; Environmental Dna; Fresh Water; Animal; Biodiversity; Cypriniformes; Dna Barcoding; Environmental Monitoring; Fish; Genetics; Phylogeography; Procedures; Animals; Biodiversity; Dna Barcoding, Taxonomic; Dna, Environmental; Environmental Monitoring; Fishes; Fresh Water; Phylogeography	environmental DNA; fresh water; animal; biodiversity; Cypriniformes; DNA barcoding; environmental monitoring; fish; genetics; phylogeography; procedures; Animals; Biodiversity; DNA Barcoding, Taxonomic; DNA, Environmental; Environmental Monitoring; Fishes; Fresh Water; Phylogeography	English	Article	Scopus
Environmental DNA unveils deep phylogeographic structure of a freshwater fish	2024	10.1111/mec.17337	Phylogeography bears an important part in ecology and evolution. However, current phylogeographic studies are largely constrained by limited numbers of individual samples. Using an environmental DNA (eDNA) assay for phylogeographic analyses, this study provides detailed information regarding the history of Siberian stone loach Barbatula toni, a primary freshwater fish across the whole range of Ho…	environmental DNA; freshwater fish; haplotypes; phylogeography	CYTOCHROME-B GENE; POPULATION-STRUCTURE; MITOCHONDRIAL; PATTERNS; SEQUENCE; HOKKAIDO; DIVERSITY; EXPANSION; REFUGIA; ISLAND	English	Article	Web of Science
Environmental DNA unveils deep phylogeographic structure of a freshwater fish	2024	10.1111/mec.17337						PubMed
Environmental DNA/RNA for non-invasive early detection and monitoring of pathogen dynamics in Atlantic salmon (Salmo salar) recirculating aquaculture systems (RAS)	2026	10.1016/j.aquaculture.2025.743060	Recirculating Aquaculture Systems (RAS) provide efficient fish production with reduced water use and precise environmental control. However, their closed design facilitates susceptibility to pathogen persistence and disease outbreaks, highlighting the need for effective monitoring and treatments. Over a 12-week study, water samples (purified eDNA/eRNA) were evaluated in two freshwater RAS units a…	Atlantic Salmon Pathogens; Environmental Dna/rna; Infection Dynamics; Non-invasive Sampling; Recirculating Aquaculture System (ras); Aquaculture System; Bacterium; Freshwater Environment; Genotype; Mortality; Pathogen; Pathogenicity; Salmonid	aquaculture system; bacterium; freshwater environment; genotype; mortality; pathogen; pathogenicity; salmonid	English	Article	Scopus
Environmental DNA/RNA metabarcoding for noninvasive and comprehensive monitoring and assessment of marine fishes	2025	10.1016/j.marpolbul.2024.117422	Marine fisheries resources are under increasing threat, necessitating the development of new effective monitoring and management strategies. Environmental DNA (eDNA) and RNA (eRNA) metabarcoding has emerged as a non-invasive and sensitive alternative method for monitoring fish biodiversity and fisheries resources and assessing the fisheries impact of anthropogenic activities. Here, we summarize c…	Dna Metabarcoding; Environmental Monitoring; Impact Assessment; Marine Fish And Fisheries; Next-generation Sequencing; Rna; Dna, Environmental; Rna; Anthropogenic; Fish; Invertebrates; Macroinvertebrates; Comprehensive Assessment; Dna Metabarcoding; Environmental Monitoring; Fishery Resources; Impact Assessments; Marine Fish; Marine Fishery; Monitoring And Assessment; Next-generation Sequencing; …	Anthropogenic; Fish; Invertebrates; Macroinvertebrates; Comprehensive assessment; DNA metabarcoding; Environmental Monitoring; Fishery resources; Impact assessments; Marine fish; Marine Fishery; Monitoring and assessment; Next-generation sequencing; Non-invasive monitoring; Environmental monitoring; environmental DNA; mitochondrial DNA; RNA 16S; RNA; DNA; environmental assessment; environmental m…	English	Review	Scopus
Environmental DNA/RNA metabarcoding for noninvasive and comprehensive monitoring and assessment of marine fishes	2025	10.1016/j.marpolbul.2024.117422	Marine fisheries resources are under increasing threat, necessitating the development of new effective monitoring and management strategies. Environmental DNA (eDNA) and RNA (eRNA) metabarcoding has emerged as a non-invasive and sensitive alternative method for monitoring fish biodiversity and fisheries resources and assessing the fisheries impact of anthropogenic activities. Here, we summarize c…	Environmental monitoring; Marine fish and fisheries; DNA metabarcoding; Impact assessment; Next-generation sequencing	DNA APPROACH; EDNA; BIODIVERSITY; OCCUPANCY; ABUNDANCE	English	Article	Web of Science
Environmental DNA/RNA metabarcoding for noninvasive and comprehensive monitoring and assessment of marine fishes	2025	10.1016/j.marpolbul.2024.117422						PubMed
Environmental DNA: A promising factor for tuberculosis risk assessment in multi-host settings	2020	10.1371/journal.pone.0233837	Attaining and maintaining the Official Tuberculosis Free status continues to be a challenge when several domestic and wild hosts contribute to the maintenance of the Mycobacterium tuberculosis complex (MTC). Local tuberculosis hotspots are sometimes identified in cattle in low-prevalence regions. We have, therefore, studied one such hotspot in depth in order to produce an epidemiological diagnosi…	Environmental Dna; Environmental Dna; Article; Bacterium Culture; Bovine; Controlled Study; European Wild Boar; Goat; Livestock; Meles Meles; Mycobacterium Avium; Mycobacterium Tuberculosis Complex; Nonhuman; Population Size; Prevalence; Risk Assessment; Sheep; Skin Test; Tuberculosis; Wildlife; Agricultural Land; Animal; Genetics; Risk Factor; Animals; Cattle; Environmental Dna; Farms; Risk Asse…	environmental DNA; Article; bacterium culture; bovine; controlled study; European wild boar; goat; livestock; Meles meles; Mycobacterium avium; Mycobacterium tuberculosis complex; nonhuman; population size; prevalence; risk assessment; sheep; skin test; tuberculosis; wildlife; agricultural land; animal; genetics; risk factor; Animals; Cattle; Environmental DNA; Farms; Risk Assessment; Risk Factor…	English	Article	Scopus
Environmental DNA: A promising factor for tuberculosis risk assessment in multi-host settings	2020	10.1371/journal.pone.0233837	Attaining and maintaining the Official Tuberculosis Free status continues to be a challenge when several domestic and wild hosts contribute to the maintenance of the Mycobacterium tuberculosis complex (MTC). Local tuberculosis hotspots are sometimes identified in cattle in low-prevalence regions. We have, therefore, studied one such hotspot in depth in order to produce an epidemiological diagnosi…		MYCOBACTERIUM-TUBERCULOSIS; CAMERA TRAPS; WILD BOAR; ROE DEER; EPIDEMIOLOGY; COMPLEX; PATHOGENS; ABUNDANCE; DISEASE; BOVIS	English	Article	Web of Science
Environmental DNA: A promising factor for tuberculosis risk assessment in multi-host settings	2020	10.1371/journal.pone.0233837						PubMed
Environmental DNA: An emerging tool in studying cave organisms; 环境 DNA——洞穴生物研究中的新技术	2021	10.11932/karst2020y48	China has enormous caves with diverse cave organisms. Many cave creatures have small population size and limited distribution. Therefore，the traditional survey on cave fauna may harm some rare or endangered cave species. Its low efficiency could also restrict the studies of cave biodiversity and conservation. As an emerging survey method，environmental DNA（eDNA）can be used to extract the trace DNA…	Biodiversity; Biospeleology; Cave Survey; Dna Barcode; Karst		Chinese	Article	Scopus
Environmental DNA-based biomonitoring of Cuban Crocodylus and their accompanying vertebrate fauna from Zapata Swamp, Cuba	2023	10.1038/s41598-023-47675-8	Crocodylians globally face considerable challenges, including population decline and extensive habitat modification. Close monitoring of crocodylian populations and their habitats is imperative for the timely detection of population trends, especially in response to management interventions. Here we use eDNA metabarcoding to identify the Critically Endangered Crocodylus rhombifer and the Vulnerab…	Environmental Dna; Molecular Marker; Article; Bioinformatics; Biological Monitoring; Biosurveillance; Clarias; Controlled Study; Crocodile; Crocodilian; Cuba; Cuban; Diagnosis; Fauna; Geographic Distribution; Habitat; Hatchling; Human; Introduced Species; Mus Musculus; Non Invasive Procedure; Nonhuman; Ovivore; Predator; Swamp; Vertebrate	environmental DNA; molecular marker; article; bioinformatics; biological monitoring; biosurveillance; Clarias; controlled study; crocodile; crocodilian; Cuba; Cuban; diagnosis; fauna; geographic distribution; habitat; hatchling; human; introduced species; Mus musculus; non invasive procedure; nonhuman; ovivore; predator; swamp; vertebrate	English	Article	Scopus
Environmental DNA-based biomonitoring of Cuban Crocodylus and their accompanying vertebrate fauna from Zapata Swamp, Cuba	2023	10.1038/s41598-023-47675-8	Crocodylians globally face considerable challenges, including population decline and extensive habitat modification. Close monitoring of crocodylian populations and their habitats is imperative for the timely detection of population trends, especially in response to management interventions. Here we use eDNA metabarcoding to identify the Critically Endangered Crocodylus rhombifer and the Vulnerab…		HYBRIDIZATION; CROCODILES; ACUTUS; MITOCHONDRIAL; CONSERVATION; BIODIVERSITY; RHOMBIFER; MORELETII; REVEALS; HISTORY	English	Article	Web of Science
Environmental DNA-based biomonitoring of Cuban Crocodylus and their accompanying vertebrate fauna from Zapata Swamp, Cuba	2023	10.1038/s41598-023-47675-8						PubMed
Environmental genomics of Late Pleistocene black bears and giant short-faced bears	2021	10.1016/j.cub.2021.04.027	Analysis of ancient environmental DNA (eDNA) has revolutionized our ability to describe biological communities in space and time,1–3 by allowing for parallel sequencing of DNA from all trophic levels.4–8 However, because environmental samples contain sparse and fragmented data from multiple individuals, and often contain closely related species,9 the field of ancient eDNA has so far been limited …	American Black Bear; Ancient Environmental Genomics; Environmental Dna; Genomics; Giant Short-faced Bear; Paleoontology; Phylogeny; Population Genetics; Dna, Ancient; Dna, Mitochondrial; Ancient Dna; Mitochondrial Dna; Animal; Bear; Fossil; Genetics; Human; Metagenomics; Phylogeny; Animals; Dna, Ancient; Dna, Mitochondrial; Fossils; Humans; Metagenomics; Phylogeny; Ursidae	ancient DNA; mitochondrial DNA; animal; bear; fossil; genetics; human; metagenomics; phylogeny; Animals; DNA, Ancient; DNA, Mitochondrial; Fossils; Humans; Metagenomics; Phylogeny; Ursidae	English	Article	Scopus
Environmental genomics of Late Pleistocene black bears and giant short-faced bears	2021	10.1016/j.cub.2021.04.027						PubMed
Environmental metabarcodes for insects: In silico PCR reveals potential for taxonomic bias	2014	10.1111/1755-0998.12265	Studies of insect assemblages are suited to the simultaneous DNA-based identification of multiple taxa known as metabarcoding. To obtain accurate estimates of diversity, metabarcoding markers ideally possess appropriate taxonomic coverage to avoid PCR-amplification bias, as well as sufficient sequence divergence to resolve species. We used in silico PCR to compare the taxonomic coverage and resol…	Environmental Dna; Insect; Metabarcoding; Pcr Bias; Cytochrome C Oxidase; Dna, Ribosomal; Electron Transport Complex Iv; Rna, Ribosomal, 16s; Cytochrome C Oxidase; Ribosome Dna; Rna 16s; Animal; Biology; Chemistry; Classification; Dna Barcoding; Genetics; Genotyping Technique; High Throughput Sequencing; Insect; Polymerase Chain Reaction; Procedures; Animals; Computational Biology; Dna Barcoding,…	cytochrome c oxidase; ribosome DNA; RNA 16S; animal; biology; chemistry; classification; DNA barcoding; genetics; genotyping technique; high throughput sequencing; insect; polymerase chain reaction; procedures; Animals; Computational Biology; DNA Barcoding, Taxonomic; DNA, Ribosomal; Electron Transport Complex IV; Genotyping Techniques; High-Throughput Nucleotide Sequencing; Insects; Polymerase C…	English	Article	Scopus
Environmental monitoring for invasive fungal pathogens of 'Ohi'a (Metrosideros polymorpha) on the Island of Hawai'i	2023	10.1007/s10530-022-02922-3	The invasive rust Austropuccina psidii was detected in the Hawaiian Islands in 2005 and has become widely established throughout the archipelago in both native and introduced species of Myrtaceae. Initial predictions about the impacts of the fungus on native 'ohi'a lehua (Metrosideros polymorpha), a keystone native tree, have not materialized, but there is ongoing concern that introductions of ne…	Austropuccina psidii; Ceratocystis lukuohia; Ceratocystis huliohia; Urediniospores; Environmental DNA; eDNA; Rapid Ohia death; Myrtle rust; Ohia rust	PUCCINIA-PSIDII; GUAVA RUST; THREAT; DEATH	English	Article	Web of Science
Environmental monitoring for invasive fungal pathogens of ʽŌhiʽa (Metrosideros polymorpha) on the Island of Hawaiʽi	2023	10.1007/s10530-022-02922-3	The invasive rust Austropuccina psidii was detected in the Hawaiian Islands in 2005 and has become widely established throughout the archipelago in both native and introduced species of Myrtaceae. Initial predictions about the impacts of the fungus on native ʽōhiʽa lehua (Metrosideros polymorpha), a keystone native tree, have not materialized, but there is ongoing concern that introductions of ne…	Austropuccina Psidii; Ceratocystis Huliohia; Ceratocystis Lukuohia; Edna; Environmental Dna; Myrtle Rust; Ohia Rust; Rapid Ohia Death; Urediniospores; Archipelago; Dna; Environmental Monitoring; Fungus; Pathogen; Rust Disease; Hawaiian Islands	archipelago; DNA; environmental monitoring; fungus; pathogen; rust disease; Hawaiian Islands	English	Article	Scopus
Environmental surveillance of zoonotic Francisella tularensis in the Netherlands	2018	10.3389/fcimb.2018.00140	Tularemia is an emerging zoonosis caused by the Gram-negative bacterium Francisella tularensis, which is able to infect a range of animal species and humans. Human infections occur through contact with animals, ingestion of food, insect bites or exposure to aerosols or water, and may lead to serious disease. F. tularensis may persist in aquatic reservoirs. In the Netherland, no human tularemia ca…	Case-related Sampling; Environmental Surveillance; Francisella Tularensis Holarctica; Genotyping; Subclades; Surface Water; Tularemia; Zoonosis; Dna; Dna, Bacterial; Dna; Fresh Water; Surface Water; Bacterial Dna; Article; Cladistics; Disease Surveillance; Environmental Exposure; Francisella Tularensis; Gene Amplification; Genotype; Human; Infection Risk; Netherlands; Nonhuman; Real Time Polymera…	DNA; fresh water; surface water; bacterial DNA; Article; cladistics; disease surveillance; environmental exposure; Francisella tularensis; gene amplification; genotype; human; infection risk; Netherlands; nonhuman; real time polymerase chain reaction; reverse transcription polymerase chain reaction; Sanger sequencing; sequence analysis; subspecies; tularemia; water contamination; zoonosis; animal…	English	Article	Scopus
Environmental Surveillance of Zoonotic Francisella tularensis in the Netherlands	2018	10.3389/fcimb.2018.00140	Tularemia is an emerging zoonosis caused by the Gram-negative bacterium Francisella tularensis, which is able to infect a range of animal species and humans. Human infections occur through contact with animals, ingestion of food, insect bites or exposure to aerosols or water, and may lead to serious disease. F. tularensis may persist in aquatic reservoirs. In the Netherland, no human tularemia ca…	Francisella tularensis holarctica; tularemia; environmental surveillance; surface water; case-related sampling; genotyping; subclades; zoonosis	TULAREMIA; SWEDEN; PERSISTENCE	English	Article	Web of Science
Environmental Surveillance of Zoonotic Francisella tularensis in the Netherlands	2018	10.3389/fcimb.2018.00140						PubMed
Equine behavioral enrichment toys as tools for non-invasive recovery of viral and host DNA	2017	10.1002/zoo.21380	Direct collection of samples from wildlife can be difficult and sometimes impossible. Non-invasive remote sampling for the purpose of DNA extraction is a potential tool for monitoring the presence of wildlife at the individual level, and for identifying the pathogens shed by wildlife. Equine herpesviruses (EHV) are common pathogens of equids that can be fatal if transmitted to other mammals. Tran…	Environmental Dna; Equine Herpesvirus; Genotyping; Non-invasive Sampling; Zebra; Dna, Viral; Virus Dna; Animal; Animal Behavior; Animal Husbandry; Classification; Devices; Equidae; Female; Genetics; Herpesviridae; Isolation And Purification; Male; Recreation; Virology; Virus Shedding; Animal Husbandry; Animals; Behavior, Animal; Dna, Viral; Female; Male; Play And Playthings; Virus Shedding	virus DNA; animal; animal behavior; animal husbandry; classification; devices; Equidae; female; genetics; Herpesviridae; isolation and purification; male; recreation; virology; virus shedding; Animal Husbandry; Animals; Behavior, Animal; DNA, Viral; Female; Male; Play and Playthings; Virus Shedding	English	Article	Scopus
Equine behavioral enrichment toys as tools for non-invasive recovery of viral and host DNA	2017	10.1002/zoo.21380	Direct collection of samples from wildlife can be difficult and sometimes impossible. Non-invasive remote sampling for the purpose of DNA extraction is a potential tool for monitoring the presence of wildlife at the individual level, and for identifying the pathogens shed by wildlife. Equine herpesviruses (EHV) are common pathogens of equids that can be fatal if transmitted to other mammals. Tran…	environmental DNA; equine herpesvirus; genotyping; non-invasive sampling; zebra	ENVIRONMENTAL DNA; ZEBRA; EHV-1	English	Article	Web of Science
Equine behavioral enrichment toys as tools for non-invasive recovery of viral and host DNA	2017	10.1002/zoo.21380						PubMed
Establishment of cytochrome P450 1a gene-knockout Javanese medaka, Oryzias javanicus, which distinguishes toxicity modes of the polycyclic aromatic hydrocarbons, pyrene and phenanthrene	2022	10.1016/j.marpolbul.2022.113578	Cytochrome P450 1a (Cyp1a) is an important enzyme for metabolism of organic pollutants. To understand its reaction to polycyclic aromatic hydrocarbons (PAHs), we knocked out this gene in a marine model fish, Javanese medaka, Oryzias javanicus, using the CRISPR/Cas 9 system. A homozygous mutant (KO) strain with a four-base deletion was established using an environmental DNA (eDNA)-based genotyping…	Acute Toxicity; Crispr/cas 9; Cyp1a; Metabolism; Polyaromatic Hydrocarbon (pah); Cytochrome P450 1a; Phenanthrene; Pyrene; Cytochrome P450; Cytochrome P-450 Cyp1a1; Cytochrome P-450 Enzyme System; Phenanthrenes; Polycyclic Aromatic Hydrocarbons; Pyrenes; Water Pollutants, Chemical; Anthracene; Fish; Genes; Metabolites; Organic Pollutants; Pyrene; Toxicity; Acute Toxicity; Crispr/cas 9; Cyp1a; Cyt…	Anthracene; Fish; Genes; Metabolites; Organic pollutants; Pyrene; Toxicity; Acute toxicity; CRISPR/cas 9; Cyp1a; Cytochromes P450; Exposed to; Gene knockout; Genotyping; Polyaromatic hydrocarbon; Polyaromatic hydrocarbons; Wild types; Metabolism; cytochrome P450 1A; environmental DNA; phenanthrene; polycyclic aromatic hydrocarbon; pyrene; cytochrome P450; cytochrome P450 1A1; phenanthrene derivat…	English	Article	Scopus
Establishment of cytochrome P450 1a gene-knockout Javanese medaka, Oryzias javanicus, which distinguishes toxicity modes of the polycyclic aromatic hydrocarbons, pyrene and phenanthrene	2022	10.1016/j.marpolbul.2022.113578	Cytochrome P450 1a (Cyp1a) is an important enzyme for metabolism of organic pollutants. To understand its reaction to polycyclic aromatic hydrocarbons (PAHs), we knocked out this gene in a marine model fish, Javanese medaka, Oryzias javanicus, using the CRISPR/Cas 9 system. A homozygous mutant (KO) strain with a four-base deletion was established using an environmental DNA (eDNA)-based genotyping…	Acute toxicity; CRISPR; Cas 9; cyp1a; Metabolism; Polyaromatic hydrocarbon (PAH)	MEDAKA ORYZIAS JAVANICUS; METABOLITES; EXPRESSION; CYP1A1	English	Article	Web of Science
Establishment of cytochrome P450 1a gene-knockout Javanese medaka, Oryzias javanicus, which distinguishes toxicity modes of the polycyclic aromatic hydrocarbons, pyrene and phenanthrene	2022	10.1016/j.marpolbul.2022.113578						PubMed
Estimating eDNA shedding and decay rates for muskellunge in early stages of development	2023	10.1002/edn3.349	Estimating population size and species distribution is essential for fisheries management and conservation. Traditionally, estimates rely on live-capture and visual surveys; however, these approaches are challenging for low density or elusive species and sensitive habitats. Environmental DNA (eDNA) has shown potential to improve fisheries management, offering a sensitive tool for species detectio…	Edna Shedding And Decay; Environmental Dna; Muskellunge (esox Masquinongy)		English	Article	Scopus
Estimating eDNA shedding and decay rates for muskellunge in early stages of development	2023	10.1002/edn3.349	Estimating population size and species distribution is essential for fisheries management and conservation. Traditionally, estimates rely on live-capture and visual surveys; however, these approaches are challenging for low density or elusive species and sensitive habitats. Environmental DNA (eDNA) has shown potential to improve fisheries management, offering a sensitive tool for species detectio…	eDNA shedding and decay; environmental DNA; muskellunge (Esox masquinongy)	ENVIRONMENTAL DNA ANALYSIS; NORTHERN PIKE; TOOL; CONSERVATION; FISHERIES; ABUNDANCE; QUANTIFICATION; CHORION; IMPACTS; HABITAT	English	Article	Web of Science
Estimating number of European eel (Anguilla anguilla) individuals using environmental DNA and haplotype count in small rivers	2023	10.1002/ece3.9785	Knowledge about population genetic data is important for effective conservation management. Genetic research traditionally requires sampling directly from the organism, for example tissue, which can be challenging, time-consuming, and harmful to the animal. Environmental DNA (eDNA) approaches offer a way to sample genetic material noninvasively. In attempts to estimate population size of aquatic …	Anguilla Anguilla; Conservation; Environmental Dna; Haplotype Count; Population Quantification		English	Article	Scopus
Estimating number of European eel (Anguilla anguilla) individuals using environmental DNA and haplotype count in small rivers	2023	10.1002/ece3.9785	Knowledge about population genetic data is important for effective conservation management. Genetic research traditionally requires sampling directly from the organism, for example tissue, which can be challenging, time-consuming, and harmful to the animal. Environmental DNA (eDNA) approaches offer a way to sample genetic material noninvasively. In attempts to estimate population size of aquatic …	Anguilla anguilla; conservation; environmental DNA; haplotype count; population quantification	EDNA; TOOL; DEGRADATION; FISH	English	Article	Web of Science
Estimating number of European eel (Anguilla anguilla) individuals using environmental DNA and haplotype count in small rivers	2023	10.1002/ece3.9785						PubMed
Estimating Rapid Diversity Changes During Acute Herbicide Contamination Using Environmental DNA	2025	10.1002/edn3.70029	The biodiversity of freshwater ecosystems globally is facing severe threats due to various anthropogenic stressors, such as habitat degradation, introduction of invasive species, and pollution. Assessing the effects of human-induced environmental stressors on population and community persistence requires accurate biodiversity estimates. While environmental DNA (eDNA) metabarcoding has emerged as …	Aquatic Biodiversity; Community Shift; Edna; Environmental Stressors; Genetic Diversity; Metabarcoding		English	Article	Scopus
Estimating Rapid Diversity Changes During Acute Herbicide Contamination Using Environmental DNA	2025	10.1002/edn3.70029	The biodiversity of freshwater ecosystems globally is facing severe threats due to various anthropogenic stressors, such as habitat degradation, introduction of invasive species, and pollution. Assessing the effects of human-induced environmental stressors on population and community persistence requires accurate biodiversity estimates. While environmental DNA (eDNA) metabarcoding has emerged as …	aquatic biodiversity; community shift; eDNA; environmental stressors; genetic diversity; metabarcoding	SURFACE WATERS; GLYPHOSATE; IMPACT; BIODIVERSITY; COMMUNITIES; IDENTIFICATION; MORPHOLOGY; TOXICITY; STREAMS; SAMPLE	English	Article	Web of Science
Estimating the genetic diversity of Pacific salmon and trout using multigene eDNA metabarcoding	2021	10.1111/mec.15811	Genetic diversity underpins species conservation and management goals, and ultimately determines a species’ ability to adapt. Using freshwater environmental DNA (eDNA) samples, we examined mitochondrial genetic diversity using multigene metabarcode sequence data from four Oncorhynchus species across 16 sites in Oregon and northern California. Our multigene metabarcode panel included targets commo…	Aquatic Community; Biodiversity; Environmental Dna; Genetic Diversity; Metabarcoding; Oncorhynchus; Animal; Genetic Variation; Oncorhynchus; Phylogeny; Salmonine; Animals; Genetic Variation; Phylogeny; Salmon; Trout	animal; genetic variation; Oncorhynchus; phylogeny; salmonine; Animals; Genetic Variation; Phylogeny; Salmon; Trout	English	Article	Scopus
Estimating the genetic diversity of Pacific salmon and trout using multigene eDNA metabarcoding	2021	10.1111/mec.15811	Genetic diversity underpins species conservation and management goals, and ultimately determines a species' ability to adapt. Using freshwater environmental DNA (eDNA) samples, we examined mitochondrial genetic diversity using multigene metabarcode sequence data from four Oncorhynchus species across 16 sites in Oregon and northern California. Our multigene metabarcode panel included targets commo…	aquatic community; biodiversity; environmental DNA; genetic diversity; metabarcoding; Oncorhynchus	COASTAL CUTTHROAT TROUT; ENVIRONMENTAL DNA; MITOCHONDRIAL-DNA; COHO SALMON; POPULATION-STRUCTURE; OREGON; STEELHEAD; EVOLUTION; INVASION; PATTERNS	English	Article	Web of Science
Estimating the genetic diversity of Pacific salmon and trout using multigene eDNA metabarcoding	2021	10.1111/mec.15811						PubMed
Estimating the number of contributors to DNA mixtures provides a novel tool for ecology	2019	10.1111/2041-210X.13079	Mixtures of DNA from multiple contributors present a novel opportunity to count individuals to inform fish and wildlife ecology. We apply a likelihood-based framework to estimate the number of contributors to a DNA mixture for ecological applications. We then assess the performance of DNA mixture estimation through a combination of simulation analyses, laboratory testing, and a field trial to est…	Aquatic Ecosystems; Dna Stain; Edna; Fisheries; Population Genetics; Spatial Ecology		English	Article	Scopus
Estimating the number of contributors to DNA mixtures provides a novel tool for ecology	2019	10.1111/2041-210X.13079	Mixtures of DNA from multiple contributors present a novel opportunity to count individuals to inform fish and wildlife ecology. We apply a likelihood-based framework to estimate the number of contributors to a DNA mixture for ecological applications. We then assess the performance of DNA mixture estimation through a combination of simulation analyses, laboratory testing, and a field trial to est…	aquatic ecosystems; DNA stain; eDNA; fisheries; population genetics; spatial ecology	ENVIRONMENTAL DNA; STOMACH CONTENTS; WALLEYE; FISH; PREY; POPULATIONS; PREDATION	English	Article	Web of Science
Estimating the proportion of resistance alleles from bulk Sanger sequencing, circumventing the variability of individual DNA	2021	10.1584/jpestics.D20-064	Specimens should be examined as much as possible to obtain a precise estimate of the proportion of resistance alleles in agricultural fields. Monitoring traps that use semiochemicals on sticky sheets are helpful in this regard. However, insects captured by such traps are ordinarily left in the field until collection. Owing to DNA degradation, the amount of DNA greatly varies among insects, causin…	DNA degradation; Sanger sequencer; confidence interval; maximum likelihood estimation; proportion of resistance; bulk sequencing	XYLOSTELLA LEPIDOPTERA PLUTELLIDAE; IN-FIELD POPULATIONS; DIAMONDBACK MOTH; MOLECULAR DIAGNOSTICS; ENVIRONMENTAL DNA; RECEPTOR GENE; FREQUENCY; MUTATION; YPONOMEUTIDAE; VALIDATION	English	Article	Web of Science
Estimation of Species Abundance Based on the Number of Segregating Sites Using Environmental DNA (eDNA)	2025	10.1111/1755-0998.14076	The advance of environmental DNA (eDNA) has enabled rapid and non-invasive species detection in aquatic environments. While most studies focus on species detection, recent works explored using eDNA concentration to quantify species abundance. However, the differential individual DNA contribution to eDNA samples could easily obscure the eDNA concentration-species abundance relationship. We propose…	Aquatic Organisms; Biodiversity Monitoring; Environmental Dna (edna); Genetic Variation; Dna, Environmental; Environmental Dna; Animal; Biodiversity; Classification; Genetic Variation; Genetics; Perciformes; Population Density; Animals; Biodiversity; Dna, Environmental; Genetic Variation; Population Density	environmental DNA; animal; biodiversity; classification; genetic variation; genetics; Perciformes; population density; Animals; Biodiversity; DNA, Environmental; Genetic Variation; Population Density	English	Article	Scopus
Estimation of Species Abundance Based on the Number of Segregating Sites Using Environmental DNA (eDNA)	2025	10.1111/1755-0998.14076	The advance of environmental DNA (eDNA) has enabled rapid and non-invasive species detection in aquatic environments. While most studies focus on species detection, recent works explored using eDNA concentration to quantify species abundance. However, the differential individual DNA contribution to eDNA samples could easily obscure the eDNA concentration-species abundance relationship. We propose…	aquatic organisms; biodiversity monitoring; environmental DNA (eDNA); genetic variation	FISH COMMUNITIES; POPULATION-SIZE; RARE; TOOL; DIVERSITY; ALIGNMENT; DENSITY	English	Article	Web of Science
Estimation of Species Abundance Based on the Number of Segregating Sites Using Environmental DNA (eDNA)	2025	10.1111/1755-0998.14076						PubMed
Estimation of tuna population by the improved analytical pipeline of unique molecular identifier-assisted HaCeD-Seq (haplotype count from eDNA)	2021	10.1038/s41598-021-86190-6	Many studies have investigated the ability to identify species from environmental DNA (eDNA). However, even when individual species are identified, the accurate estimation of their abundances by traditional eDNA analyses has been still difficult. We previously developed a novel analytical method called HaCeD-Seq (Haplotype Count from eDNA), which focuses on the mitochondrial D-loop sequence. The …	Environmental Dna; Animal; Dna Sequence; Genetics; Haplotype; Population Density; Tuna; Animals; Environmental Dna; Haplotypes; Population Density; Sequence Analysis, Dna; Tuna	animal; DNA sequence; genetics; haplotype; population density; tuna; Animals; Environmental DNA; Haplotypes; Population Density; Sequence Analysis, DNA; Tuna	English	Article	Scopus
Estimation of tuna population by the improved analytical pipeline of unique molecular identifier-assisted HaCeD-Seq (haplotype count from eDNA)	2021	10.1038/s41598-021-86190-6	Many studies have investigated the ability to identify species from environmental DNA (eDNA). However, even when individual species are identified, the accurate estimation of their abundances by traditional eDNA analyses has been still difficult. We previously developed a novel analytical method called HaCeD-Seq (Haplotype Count from eDNA), which focuses on the mitochondrial D-loop sequence. The …		PACIFIC BLUEFIN TUNA; ENVIRONMENTAL DNA; QUANTIFICATION; JAPONICUS; READS; TOOL	English	Article	Web of Science
Estimation of tuna population by the improved analytical pipeline of unique molecular identifier-assisted HaCeD-Seq (haplotype count from eDNA)	2021	10.1038/s41598-021-86190-6						PubMed
Evaluating a Logistic K-mer Based Model for Classifying CO1 Sequences of C. Clupeaformis	2021	10.1007/978-3-030-63591-6_56	Lake whitefish (Coregonus clupeaformis) are a primary support for subsistence and commercial fishing in Canada. In the 20th century, lake whitefish populations experienced a dramatic decline as a result of overfishing, environmental degradation, and predation. With proper environmental management and fishery management, populations have recovered, however certain local populations are still at ri…	Edna Sequences; Logistic K-mer Model; Machine Learning; Natural Language Processing; Computation Theory; Environmental Management; Fisheries; Lakes; Machine Learning; Natural Language Processing Systems; Population Statistics; Classification Accuracy; Commercial Fishing; Evolutionary Potential; Fishery Management; Natural Language Processing; Physical Environments; Sophisticated Machines; Sustain…	Computation theory; Environmental management; Fisheries; Lakes; Machine learning; Natural language processing systems; Population statistics; Classification accuracy; Commercial fishing; Evolutionary potential; Fishery management; NAtural language processing; Physical environments; Sophisticated machines; Sustainable yields; Learning algorithms	English	Book chapter	Scopus
Evaluating bioinformatics pipelines for population-level inference using environmental DNA	2022	10.1002/edn3.269	Environmental DNA is mainly not only used at the interspecific level, to quantify species diversity in ecosystems, but can also be used to quantify intraspecific genetic variability, thus avoiding the need to sample individual tissue. However, errors in the amplification and sequencing of eDNA samples can blur this intraspecific signal and strongly over-estimate genetic diversity. Existing bioinf…	Bioinformatics; Environmental Dna; Fish; Genetic Diversity; Marine Ecology		English	Article	Scopus
Evaluating bioinformatics pipelines for population-level inference using environmental DNA	2022	10.1002/edn3.269	Environmental DNA is mainly not only used at the interspecific level, to quantify species diversity in ecosystems, but can also be used to quantify intraspecific genetic variability, thus avoiding the need to sample individual tissue. However, errors in the amplification and sequencing of eDNA samples can blur this intraspecific signal and strongly over-estimate genetic diversity. Existing bioinf…	bioinformatics; environmental DNA; fish; genetic diversity; marine ecology	MULLUS-SURMULETUS; DIVERSITY; MIGRATION; EDNA	English	Article	Web of Science
Evaluating intraspecific genetic diversity using environmental DNA and denoising approach: A case study using tank water	2020	10.1002/edn3.44	Recent advances in environmental DNA (eDNA) analysis using high-throughput sequencing (HTS) provide a noninvasive way to evaluate the intraspecific genetic diversity of aquatic macroorganisms. However, erroneous sequences present in HTS data can result in false positive haplotypes; therefore, reliable strategies are necessary to eliminate such erroneous sequences when evaluating intraspecific gen…	Asv Methods; Environmental Dna; Erroneous Sequences; Intraspecific Genetic Diversity; Mitochondrial Haplotype		English	Article	Scopus
Evaluating the Use of Environmental DNA for Pinniped Detection and Population Genetics at Haulout Sites	2025	10.1111/mms.70047	Population genetics is an important tool in marine resource management, but the collection of genetic data for marine mammals can be physically invasive and logistically challenging. Environmental DNA (eDNA) provides a non-invasive method for monitoring the presence of marine mammals. However, effective applications are limited by gaps in our knowledge about how eDNA behaves in the marine environ…	Gray Seal; Mitochondrial Control Region; Non-invasive Sampling; Protected Species		English	Article	Scopus
Evaluating the Use of Environmental DNA for Pinniped Detection and Population Genetics at Haulout Sites	2025	10.1111/mms.70047	Population genetics is an important tool in marine resource management, but the collection of genetic data for marine mammals can be physically invasive and logistically challenging. Environmental DNA (eDNA) provides a non-invasive method for monitoring the presence of marine mammals. However, effective applications are limited by gaps in our knowledge about how eDNA behaves in the marine environ…	gray seal; mitochondrial control region; non-invasive sampling; protected species	HALICHOERUS-GRYPUS; DIVERSITY; BOTTLENECK; RECOVERY; EDNA	English	Article; Early Access	Web of Science
Evaluation of eDNA for groundwater invertebrate detection and monitoring: a case study with endangered Stygobromus (Amphipoda: Crangonyctidae)	2018	10.1007/s12686-017-0785-2	Effective conservation and management of biodiversity is limited by a lack of critical knowledge on species’ distributions and abundances. This problem is particularly exacerbated for species living in habitats that are exceptionally difficult to access or survey, such as groundwater habitats. Environmental DNA (eDNA) represents a rapid, noninvasive, and potentially cost-effective new tool for de…	District Of Columbia; Hypotelminorheic Seep, Real-time Pcr; Short-range Endemic; Stygobromus Hayi; Stygobromus Tenuis Potomacus; Subterranean		English	Article	Scopus
Evaluation of eDNA for groundwater invertebrate detection and monitoring: a case study with endangered Stygobromus (Amphipoda: Crangonyctidae)	2018	10.1007/s12686-017-0785-2	Effective conservation and management of biodiversity is limited by a lack of critical knowledge on species' distributions and abundances. This problem is particularly exacerbated for species living in habitats that are exceptionally difficult to access or survey, such as groundwater habitats. Environmental DNA (eDNA) represents a rapid, noninvasive, and potentially cost-effective new tool for de…	District of Columbia; Hypotelminorheic seep; real-time PCR; Short-range endemic; Stygobromus hayi; Stygobromus tenuis potomacus; Subterranean	6TH MASS EXTINCTION; ENVIRONMENTAL DNA; CRYPTIC DIVERSITY; BIODIVERSITY; WATER; CONSERVATION; ACCURACY; CAVEFISH; BIOLOGY	English	Article	Web of Science
Evaluation of extraction and purification methods for obtaining PCR-amplifiable DNA from aged refuse for microbial community analysis	2009	10.1007/s11274-009-0106-3	In order to develop and establish a method for isolation of PCR-amplifiable DNA from aged refuse, the orthogonal experiment was conducted to evaluate systematically the effects of various steps within each method in terms of DNA yield, purity, fragment size, humus contamination, PCR amplifiability using universal eubacterial and archaeal 16S rDNA prime pairs, and genetic diversity estimate from d…	Aged refuse; DNA extraction; PCR; DGGE	GRADIENT GEL-ELECTROPHORESIS; OXIDIZING BACTERIA; ENVIRONMENTAL DNA; HUMIC SUBSTANCES; WASHING IMPROVES; SOIL; RECOVERY; REMOVAL	English	Article	Web of Science
Evaluation of genetic diversity in an endangered fish Gnathopogon caerulescens using environmental DNA and its potential use in fish conservation	2023	10.1002/edn3.408	Gnathopogon caerulescens, an endemic fish of Lake Biwa, Japan, is one of the most important fishes for lake fisheries. It has been listed as an endangered species following its population decline in the 1990s and thus needs conservation. An increasing number of studies have recently stressed on the importance of incorporating genetic diversity for conservation purposes. In this study, we aimed to…	Edna; Haplotype; High-throughput Sequencing; Intraspecific Diversity; Population Genetics		English	Article	Scopus
Evaluation of genetic diversity in an endangered fish Gnathopogon caerulescens using environmental DNA and its potential use in fish conservation	2023	10.1002/edn3.408	Gnathopogon caerulescens, an endemic fish of Lake Biwa, Japan, is one of the most important fishes for lake fisheries. It has been listed as an endangered species following its population decline in the 1990s and thus needs conservation. An increasing number of studies have recently stressed on the importance of incorporating genetic diversity for conservation purposes. In this study, we aimed to…	eDNA; haplotype; high-throughput sequencing; intraspecific diversity; population genetics	MITOCHONDRIAL-DNA; POPULATION-GENETICS; R PACKAGE; HONMOROKO; EXTRAPOLATION; RAREFACTION; EGGS	English	Article	Web of Science
Evidence of a novel cross-species transmission by ovine papillomaviruses	2022	10.1111/tbed.14756	Ovine papillomavirus (OaPV) comprises four genotypes; OaPV1, OaPV2 and OaPV4 are fibropapillomaviruses within the genus Deltapapillomavirus, whereas OaPV3 is an epitheliotropic virus that belongs to the genus Dyokappapapillomavirus. To date, all of them have been known to infect sheep only. OaPV1, OaPV2 and OaPV4 have been associated with ovine cutaneous and mucosal fibropapillomas, whereas OaPV3…	Blood; Cattle; Corn Silage; Cross-species Transmission; Grass Hay; Ovine Papillomaviruses; Autodg; Dneasy; Econotaq Plus; One-step Rt; Qiaquick; Quantitect; Rneasy Plus; Seqstudio; T100; Environmental Dna; Article; Blood Sampling; Coinfection; Controlled Study; Dna Extraction; Droplet Digital Polymerase Chain Reaction; Gene Dosage; Genotype; Hay; Limit Of Detection; Nonhuman; Ovine Papillomavirus…	environmental DNA; Article; blood sampling; coinfection; controlled study; DNA extraction; droplet digital polymerase chain reaction; gene dosage; genotype; hay; limit of detection; nonhuman; ovine papillomavirus; ovine papillomavirus 1; ovine papillomavirus 2; ovine papillomavirus 3; ovine papillomavirus 4; Papillomaviridae; papillomavirus infection; papovavirus; reverse transcription polymerase…	English	Article	Scopus
Evidence of a population of leaf-eared mice Phyllotis vaccarum above 6,000 m in the Andes and a survey of high-elevation mammals	2022	10.1093/jmammal/gyac028	Biologists have long pondered the extreme limits of life on Earth, including the maximum elevation at which species can live and reproduce. Here we review evidence of a self-sustaining population of mice at an elevation that exceeds that of all previously reported for mammals. Five expeditions over 10 years to Volcán Llullaillaco on the Argentina/Chile border observed and collected mice at elevat…	Alpine; Altitud; Altitude; Ambientes Extremos; Andes; Andes; Comunidades Microbianas; Extreme Environments; Leaf-eared Mouse; Llullaillaco; Microbial Communities; Ratón Orejudo; Volcán Llullaillaco; Alpine Environment; Altitude; Elevation; Mammal; Microbial Community; Rodent; Soil Microorganism; Andes; Argentina; Chile	alpine environment; altitude; elevation; mammal; microbial community; rodent; soil microorganism; Andes; Argentina; Chile	English	Article	Scopus
Evidence of a population of leaf-eared mice Phyllotis vaccarum above 6,000 m in the Andes and a survey of high-elevation mammals	2022	10.1093/jmammal/gyac028	Biologists have long pondered the extreme limits of life on Earth, including the maximum elevation at which species can live and reproduce. Here we review evidence of a self-sustaining population of mice at an elevation that exceeds that of all previously reported for mammals. Five expeditions over 10 years to Volcan Llullaillaco on the Argentina/Chile border observed and collected mice at elevat…	altitud; ambientes extremos; Andes; comunidades microbianas; raton orejudo; volcan Llullaillaco	RNA GENE DATABASE; SOCOMPA VOLCANO; ALTITUDE; ATACAMA; ISLANDS; HABITAT; SEARCH	English	Article	Web of Science
Evidence of a population of leaf-eared mice Phyllotis vaccarum above 6,000 m in the Andes and a survey of high-elevation mammals	2022	10.1093/jmammal/gyac028						PubMed
Evidence supporting the uptake and genomic incorporation of environmental DNA in the "ancient asexual" bdelloid rotifer Philodina roseola	2016	10.3390/life6030038	Increasing evidence suggests that bdelloid rotifers regularly undergo horizontal gene transfer, apparently as a surrogate mechanism of genetic exchange in the absence of true sexual reproduction, in part because of their ability to withstand desiccation. We provide empirical support for this latter hypothesis using the bdelloid Philodina roseola, which we demonstrate to readily internalize enviro…	Anhydrobiosis; Asexual Reproduction; Bdelloidea; Desiccation; Dna Uptake; Genetic Exchange; Horizontal Gene Transfer		English	Article	Scopus
[truncated: 562 more rows]

## Sheet: B. Duplicated removal
Title	DOI	Source	Duplicated
[truncated: 514 more rows]

[truncated: 7 more sheets: C.1. Records < 2010, C.2. Language not English, C.3. Not article or review, D. Title and abstract screeing, E. Full text screening, F. Final dataset, G. Filtering process]
