# Supplementary material for: Environmental DNA at the population level: advancing conservation through non-invasive genetic and genomic approaches
Source: Research Square preprint supplement (doi:10.21203/rs.3.rs-8659594/v1), 2026-02-02
Supplement: Supplementary file 2 [file 8e181c6743de18e15549827a.xlsx]

## Sheet: Table S2
Table S2: Molecular approaches for population genetics analyses in environmental DNA (eDNA) studies. Metadata extracted from articles included after PRISMA-guided screening, summarizing molecular approaches for population genetics analyses in eDNA studies. Hd = haplotype diversity, f = allele frequency, π = nucleotide diversity, Fst = fixation index, Nef = effective female population size, Nh = n…
Genetic compartment	Genetic marker	Fragment size amplified (bp)	Sequencing technique	Genetic parameters	Environment	Species	Reference
Mitochondrial	D-loop	400	Miseq Illumina	Hd / f / π / Gst	Freshwater	Sculpin	Tsuri et.al (2023)
Mitochondrial	D-loop	371	Miseq Illumina	Nh / Hd / f / π	Marine	Shark	Dugal et al. (2022)
Mitochondrial	D-loop	348	Miseq Illumina	Nh / Hd / f / π	Marine	Dolphin	Bennington et al. (2024)
Mitochondrial	D-loop	250-300	Miseq Illumina	Nh / Hd / f / π / Nef	Marine	Shark	Sigsgaard et al. (2016)
Mitochondrial	D-loop	250	Miseq Illumina	Nh / Hd / π	Freshwater	Eel	Halvorsen et al. (2023)
Mitochondrial	D-loop	270	Miseq Illumina	Hd	Freshwater	Carp	Tsuji et al. (2023)
Mitochondrial	D-loop	259	Miseq Illumina	Hd	Marine	Red mullet	Macé et al. (2022)
Mitochondrial	D-loop	245	Miseq Illumina	π / S / D / m / Nef	Freshwater	Ayu	Tsuji et al. (2020c)
Mitochondrial	D-loop	290	Miseq Illumina	Nh / Hd	Freshwater	Ayu	Tsuji et al. (2020a)
Mitochondrial	D-loop	290	Miseq Illumina	Nh / Hd	Freshwater	Ayu	Tsuji et al. (2020b)
Mitochondrial	D-loop	186	iSeq llumina	Nh / Hd	Freshwater	Bluegill	Wakimura et al. (2025)
Mitochondrial	D-loop	191	NovaSeq Illumina	Nh / Hd / f / π	Marine	Whale	Székely et al. (2021)
Mitochondrial	D-loop	300	-	f	Freshwater	-	Azarian et al. (2021)
Mitochondrial	D-loop	-	-	Nh / f	Freshwater	Carp	Uchii et al. (2016)
Mitochondrial	D-loop	100-300	Sanger	Nh	Marine	Turtle	As-singlkily et al. (2025)
Mitochondrial	D-loop	250	-	Fst / Hd / ASVs / π	Marine	Orange-Spotted Grouper	Hui et al. (2025)
Mitochondrial	D-loop	166	Miseq Illumina	h / Nh / Hd / Fst	Freshwater	Ayu	Tsuji et al. (2023)
Mitochondrial	D-loop	-	Sanger	Nh / Hd	Marine	Tuna	Yoshitake et al. (2021)
Mitochondrial	D-loop	476-493	Illumina	Nh / Hd / Nef / π	Marine	Shark	Sigsgaard et al. (2017)
Mitochondrial	Cyt B	127	-	m / h / π / D / Fst / ASVs	Freshwater	Moroko gudgeon	Wakimura et al. (2023)
Mitochondrial	Cyt B	350	NovaSeq Illumina	Nh / Hd / f	Freshwater	Goby	Tsuji et al. (2025)
Mitochondrial	Cyt B	132	-	Presence or absence	Freshwater	Zebrafish	Jo et al. (2023)
Mitochondrial	Cyt B	111	Miseq Illumina	Presence or absence	Freshwater	Frog	Lacoursière-Roussel et al. (2016)
Mitochondrial	Cyt B	73	Sanger	Presence or absence	Freshwater	Carp	Harper et al. (2016)
Mitochondrial	Cyt B	78	-	Presence or absence	Freshwater	Carp	Takahara et al. (2012)
Mitochondrial	Cyt B	77	-	f / π	Freshwater	Carp	Uchii et al. (2017)
Mitochondrial	Cyt B	158-224	-	Hd	Freshwater	Salamander	Wang et al. (2022)
Mitochondrial	Cyt B	-	Sanger/Illumina	Fst/Hd/Nh	Freshwater	Carp/Goby	Synder et al. (2019)
Mitochondrial	Cyt B	420	Miseq Illumina	ASVs / Genetic Distance	Freshwater	Italian riffle dace	Vance et al. (2025)
Mitochondrial	COI	147	Miseq Illumina	Nh / Hd / He	Freshwater	Goby	Andres et al (2023)
Mitochondrial	COI	313	NovaSeq Illumina	Nh / Hd / ASVs-OTUs	Marine	Shrimp / Greenling / Prickleback	Turanov et al. (2024)
Mitochondrial	COI	313	Miseq Illumina	Nh / Hd / ASVs	Freshwater	Rotifers / Crustaceans / Insects	Loria et al. (2025)
Mitochondrial	COI	331	Miseq Illumina	Nh / Hd / f / π	Freshwater	Frog	Zanovello et al. (2023)
Mitochondrial	COI	240	Miseq Illumina	Hd / f / π	Marine	Shark	Jensen et al. (2023)
Mitochondrial	COI	169-175	Miseq Illumina	Nh / f / ASVs	Marine	Mussel	Marshall & Stepien (2019)
Mitochondrial	COI	147	Miseq Illumina	Hd / He	Freshwater	Goby	Andres et al. (2023)
Mitochondrial	COI	233	Miseq Illumina	Nh / Hd / π / m / Fst	Freshwater	Salmon/Trout	Weitemier et al. (2021)
Mitochondrial	COI	71-167	Miseq Illumina	Presence or absence	Freshwater	Turtle	Lacoursière-Roussel et al. (2016)
Mitochondrial	COI	132-143	Miseq Illumina	Presence or absence	Freshwater	Frog	Lacoursière-Roussel et al. (2016)
Mitochondrial	COI	130	Miseq Illumina	Presence or absence	Freshwater	Snake	Lacoursière-Roussel et al. (2016)
Mitochondrial	COI	205	HiSeq Illumina	Presence or absence / ASVs	Freshwater	Several individues	Hupalo et al. (2022)
Mitochondrial	COI	126-154	Sanger	Presence or absence	Freshwater	Shrimp	Niemiller et al. (2018)
Mitochondrial	COI	155	Oxford Nanopore Technologies	Presence or absence	Terrestrial	Bobcat	Koda et al. (2023)
Mitochondrial	COI	65	-	Presence or absence	Freshwater	Crayfish	Curtis & Larson (2020)
Mitochondrial	COI	-	-	m	Freshwater	Salmon	Levi et al. (2019)
Mitochondrial	COI	559	-	m	Freshwater	Snail	Kitabatake et al. (2025)
Mitochondrial	COI	304-313	NextSeq Illumina	Presence or absence / ASVs	Seawater	Multiple	Stat et al. (2017)
Mitochondrial	ATP8-ATP6	309	Miseq Illumina	Hd	Marine	Abalone	Adams et al. (2023)
Mitochondrial	tRNA-Glu	430	-	Presence or absence	Freshwater	Zebrafish	Jo et al. (2023)
Mitochondrial	ND	150-193	Sanger	Hd / Presence or abscence	Freshwater	Salamander	Wakimura et al. (2025)
Mitochondrial	ND	170	iSeq llumina	Nh / Hd	Freshwater	Bluegill	Wakimura et al. (2025)
Mitochondrial	ND	-	Hiseq llumina / NovaSeq Illumna / Oxford Nanopore	-	-	Several inidividues	McCauley et al. (2024)
Mitochondrial	ND	715-1021	-	Presence or absence	Freshwater	Zebrafish	Jo et al. (2023)
Mitochondrial	ND	292	Miseq Illumina	Nh / Hd / π / m / Fst	Freshwater	Salmon/Trout	Weitemier et al. (2021)
Mitochondrial	12S	370	Miseq Illumina	Hd	Freshwater	Goby	Tsuji et al. (2023)
Mitochondrial	12S	150	NovaSeq Illumina	ASVs	Freshwater	Several individues	Skelton et al. (2023)
Mitochondrial	12S	198	Miseq Illumina	Nh / Hd / π / m / Fst	Freshwater	Salmon/Trout	Weitemier et al. (2021)
Mitochondrial	12S	30-130	HiSeq Illumina	OTUs	Marine	Frog	Li et al. (2021)
Mitochondrial	12S	-	Sanger/Illumina	Fst/Hd/Nh	Freshwater	Carp/Goby	Synder et al. (2019)
Mitochondrial	16S	90-213	NextSeq Illumina	Presence or absence / ASVs	Seawater	Multiple	Stat et al. (2017)
Mitochondrial	16S	621	-	Hd/Nh	Freshwater	Snail	Clusa et al. (2016)
Mitochondrial	16S	-	Miseq Illumina	ASVs	Freshwater	Multiple	Li et al. (2023)
Mitochondrial	HVR2	423	Miseq Illumina	Nh / Hd	Freshwater	Human	Kapoor et al. (2017)
Chloroplast	trnL	122-157	NextSeq Illumina	Presence or absence / ASVs	Seawater	Multiple	Stat et al. (2017)
Chloroplast	23S	122-163	NextSeq Illumina	Presence or absence / ASVs	Seawater	Multiple	Stat et al. (2017)
Nuclear	18S	250	Miseq Illumina	ASVs	Seawater	Algae	Pratomo et al. (2022)
Nuclear	18S	336-423	NextSeq Illumina	Presence or absence / ASVs	Seawater	Multiple	Stat et al. (2017)
Nuclear	Microsatellites	228-435	Miseq Illumina	Nh / Hd / He	Freshwater	Goby	Andres et al (2023)
Nuclear	Microsatellites	-	MiniSeq Illumina	Nh / Hd	Freshwater	Bear/Wolf/Lynx	de Barbara et al. (2023)
Nuclear	Microsatellites	122-229	-	Nh / Hd / He	Terrestrial	Bear/Leopard/Lynx	Hellström et al. (2023)
Nuclear	Microsatellites	-	-	Hd / He	Terrestrial	Bear	Wheat (2016)
Nuclear	Microsatellites	228-435	Miseq Illumina	Hd / He	Freshwater	Goby	Andres et al. (2023)
Nuclear	Microsatellites	-	-	m	Freshwater	Yellow Perch	Sethi et al. (2018)
Nuclear	Microsatellites	250	Miseq Illumina	Nh / Hd	Freshwater	Goby	Andres et al. (2021)
Nuclear	Microsatellites	200-400	Miseq Illumina	Nh / Hd / f
Nuclear	Complete genome	262	Miseq Illumina	Hd / f / π	Marine	Shark	Jensen et al. (2023)
Nuclear	SNPs	300	Miseq Illumina	Fst / f	Freshwater	Frog	Manel et al. (2025)
Nuclear	SNPs	121	Ion 540	f	Terrestrial	Bee	Bovo et al. (2021)
Nuclear	SNPs	49-109	NextSeq Illumina / Oxford Nanopore	Nh / Hd	Freshwater	Astatotilapia	Wakimura et al. (2025)
Nuclear	ZNF 285	-	Hiseq llumina / NovaSeq Illumna / Oxford Nanopore	-	-	Several inidividues	McCauley et al. (2024)
